# Supplementary material for: Bromo–nitro substitution on a tertiary α carbon—a previously uncharacterized facet of the Kornblum substitution
Source: Royal Society of Chemistry journal article supplement (doi:10.1039/c5ra14798k), 2015-01-01

## Electronic supplementary information for: Bromo–nitro substitution on a tertiary $\alpha$ carbon—a previously uncharacterized facet of the Kornblum substitution

By Matthew J. Leonard, Peter G. McKay and Anthony R. Lingham.

The infra red spectra of compounds **1** and **2** were taken using the KBr disc method.

NMR conditions are given below each spectrum.

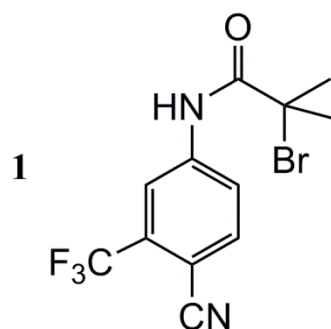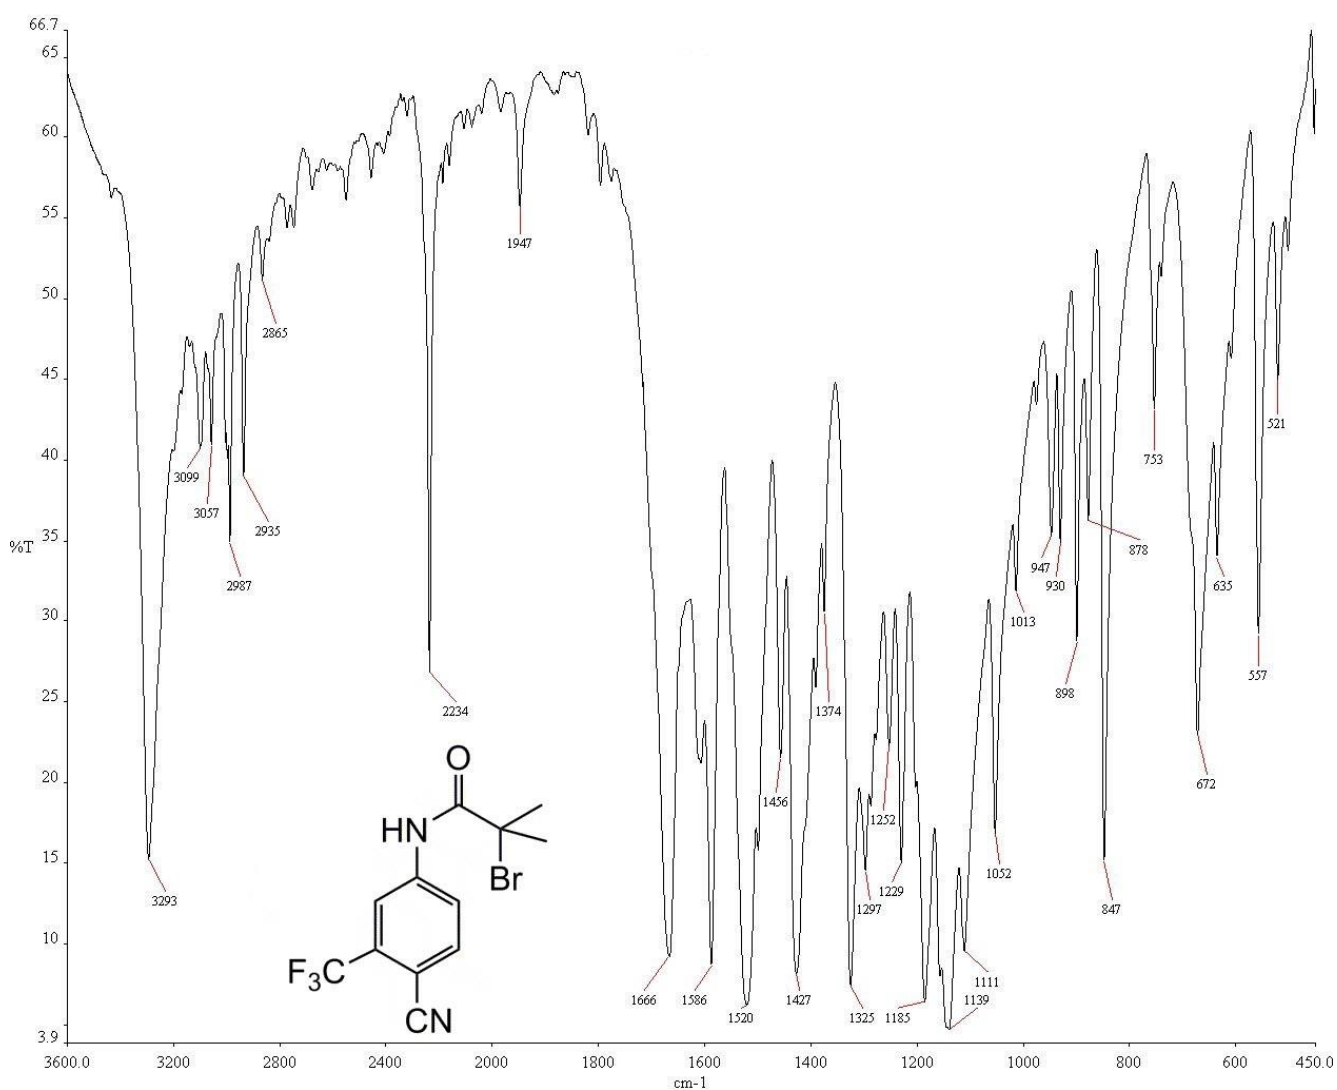

ESI for:

Bromo–nitro substitution on a tertiary  $\alpha$  carbon—a previously uncharacterized facet of the Kornblum substitution

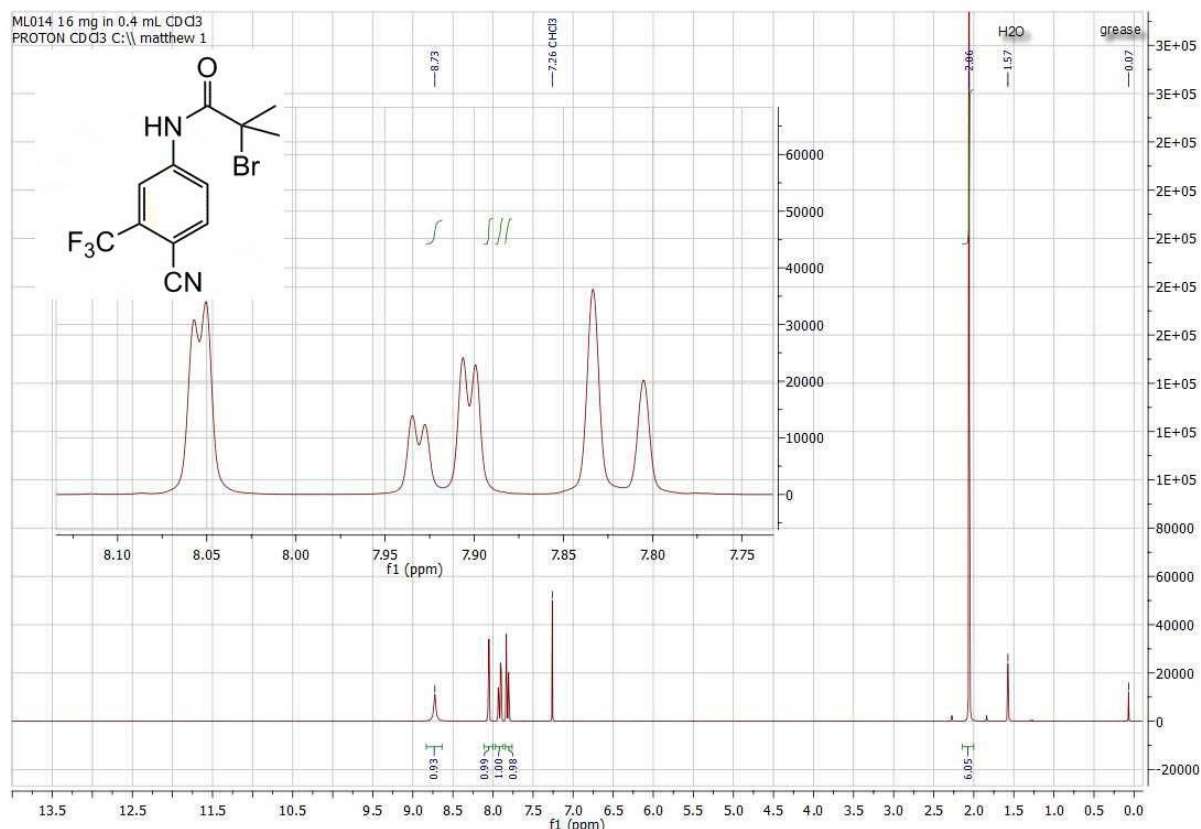

20 mg of **1** in 0.4 mL CDCl<sub>3</sub>, 300 MHz, 256 scans

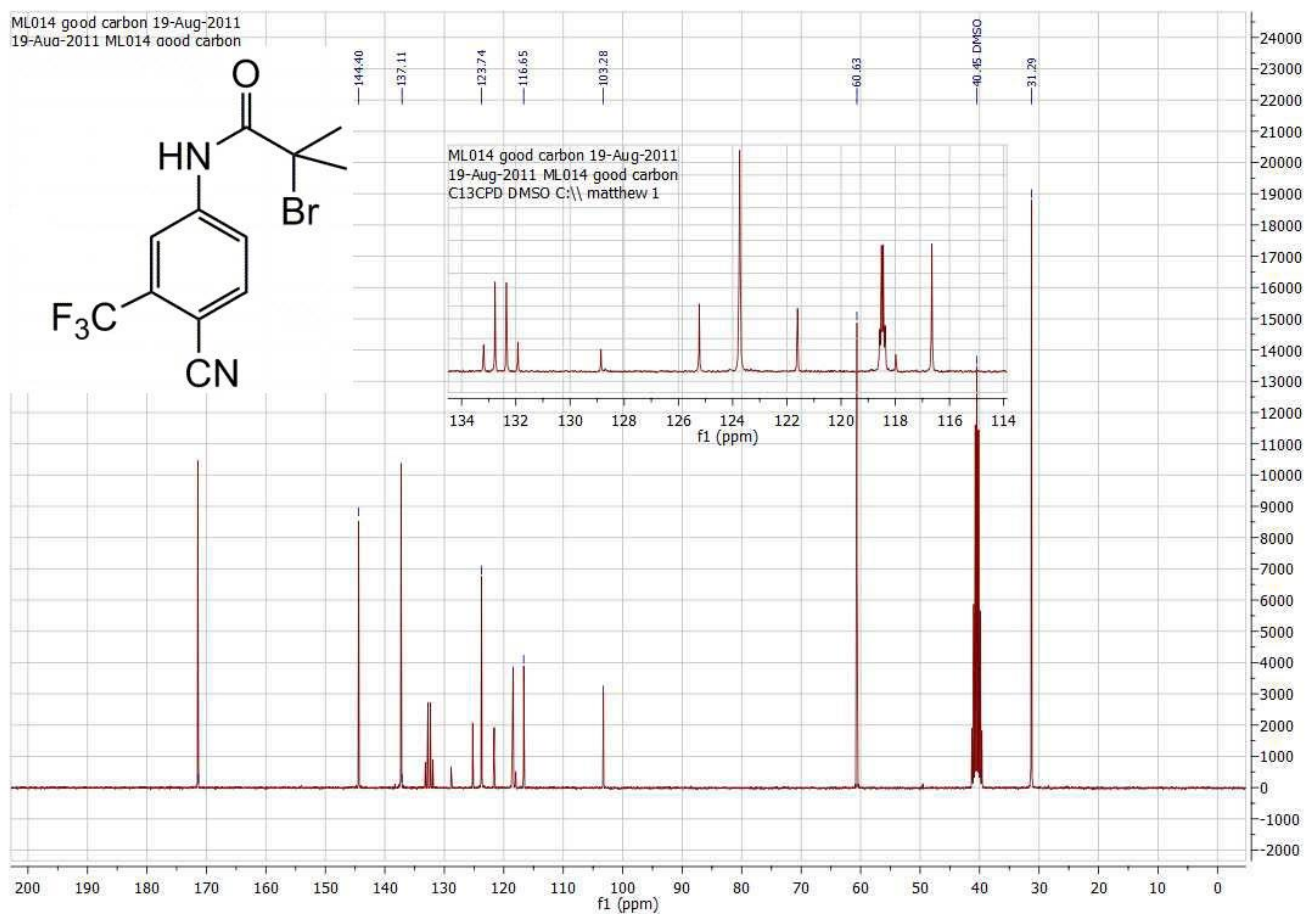

40 mg of **1** in 0.4 mL d<sub>6</sub>-DMSO, 75 MHz, 2048 scans

ESI for:

Bromo–nitro substitution on a tertiary  $\alpha$  carbon—a previously uncharacterized facet of the Kornblum substitution

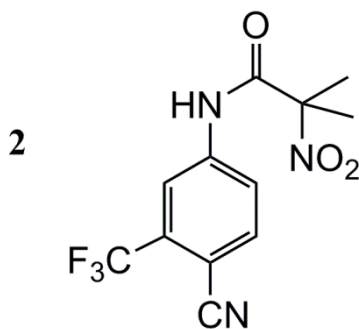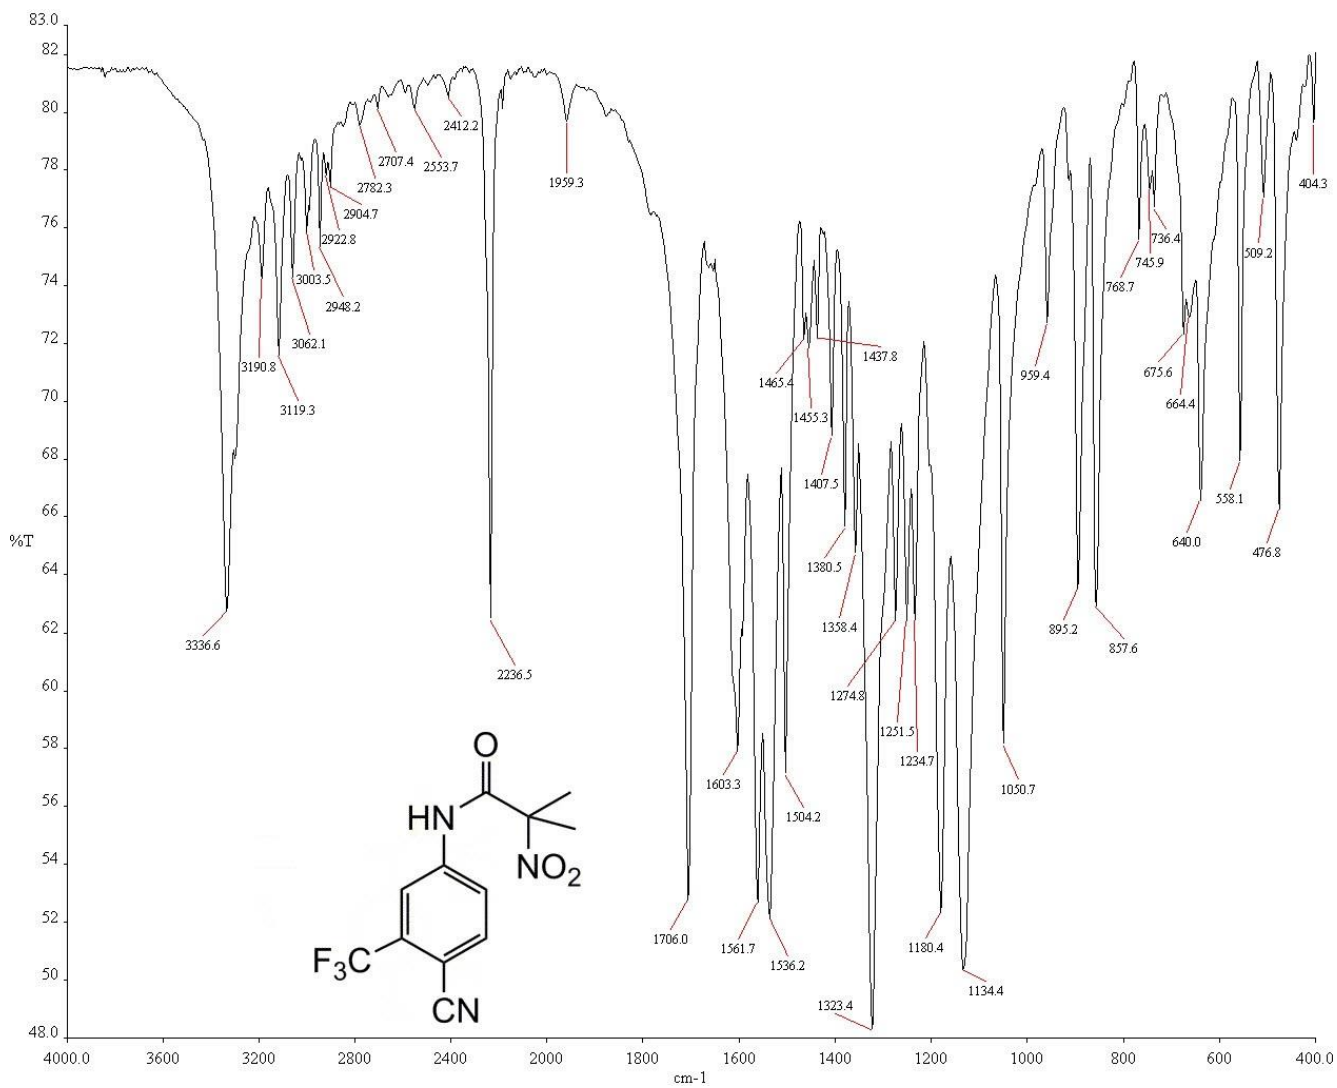

ESI for:

Bromo–nitro substitution on a tertiary  $\alpha$  carbon—a previously uncharacterized facet of the Kornblum substitution

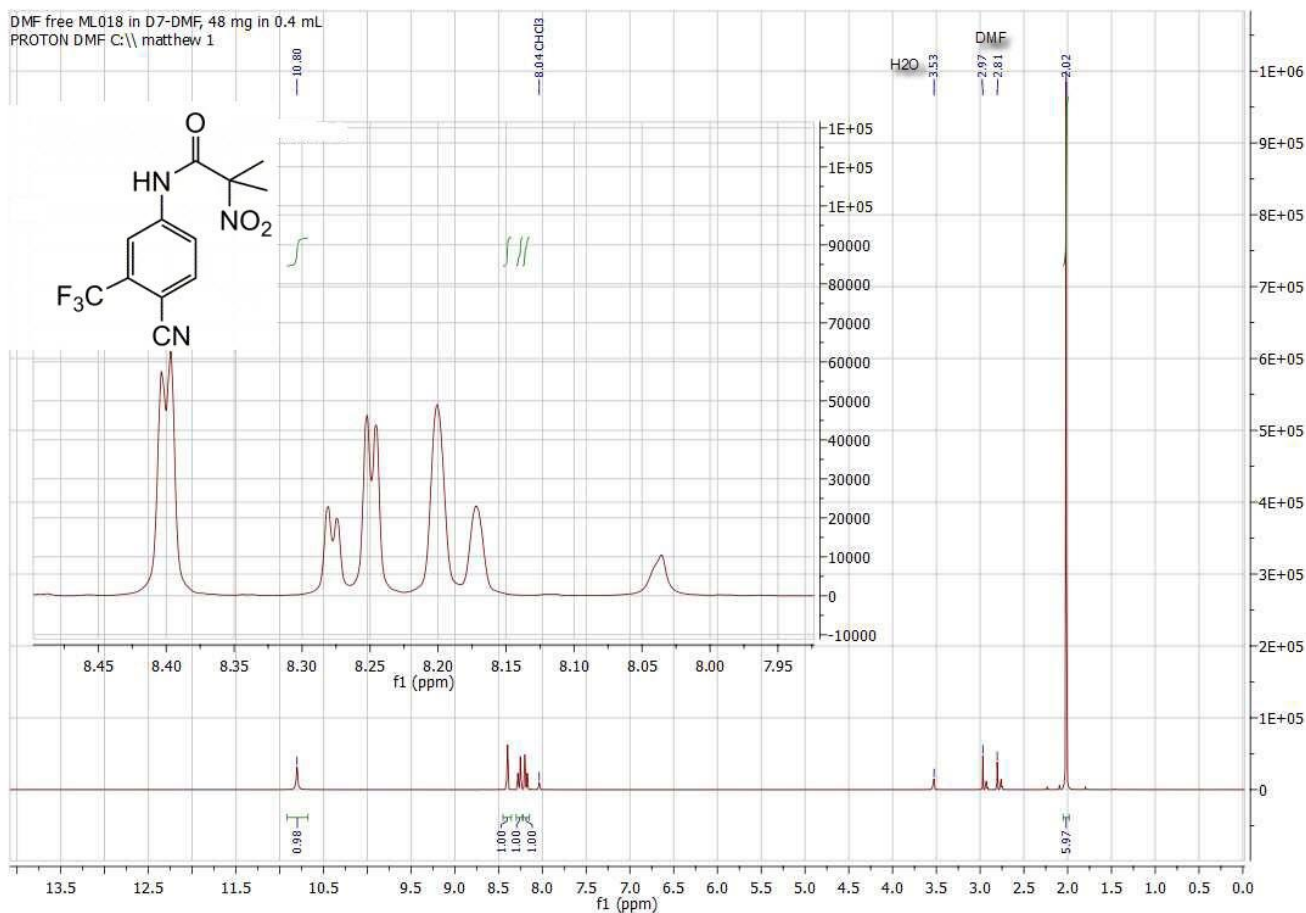

48 mg of **2** in 0.4 mL  $d_7$ -DMF, 300 MHz, 256 scans

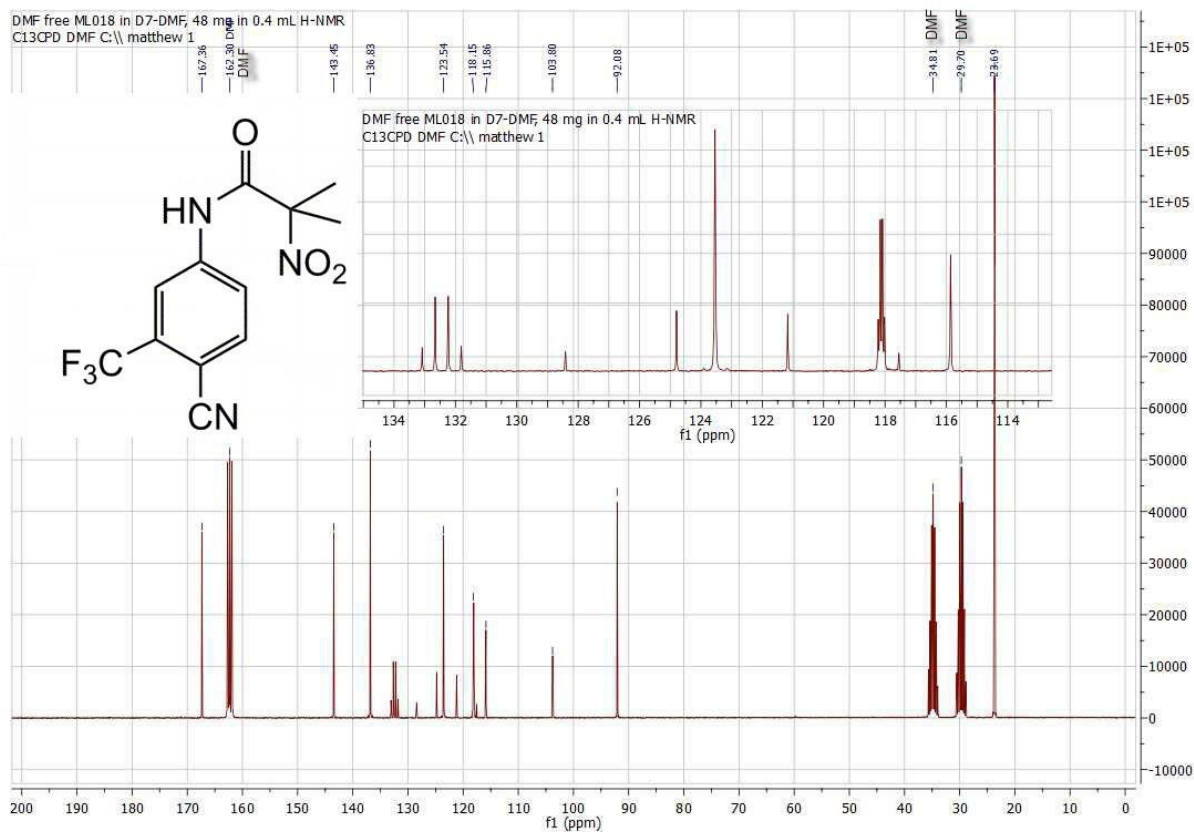

48 mg of **2** in 0.4 mL  $d_7$ -DMF, 75 MHz, 20000 scans

ESI for:

Bromo–nitro substitution on a tertiary  $\alpha$  carbon—a previously uncharacterized facet of the Kornblum substitution

All infra red spectra from here on were taken using the diamond ATR method.

NMR conditions are given below each spectrum.

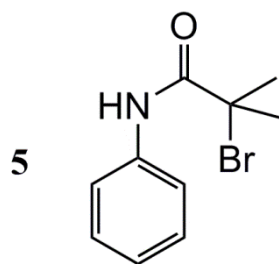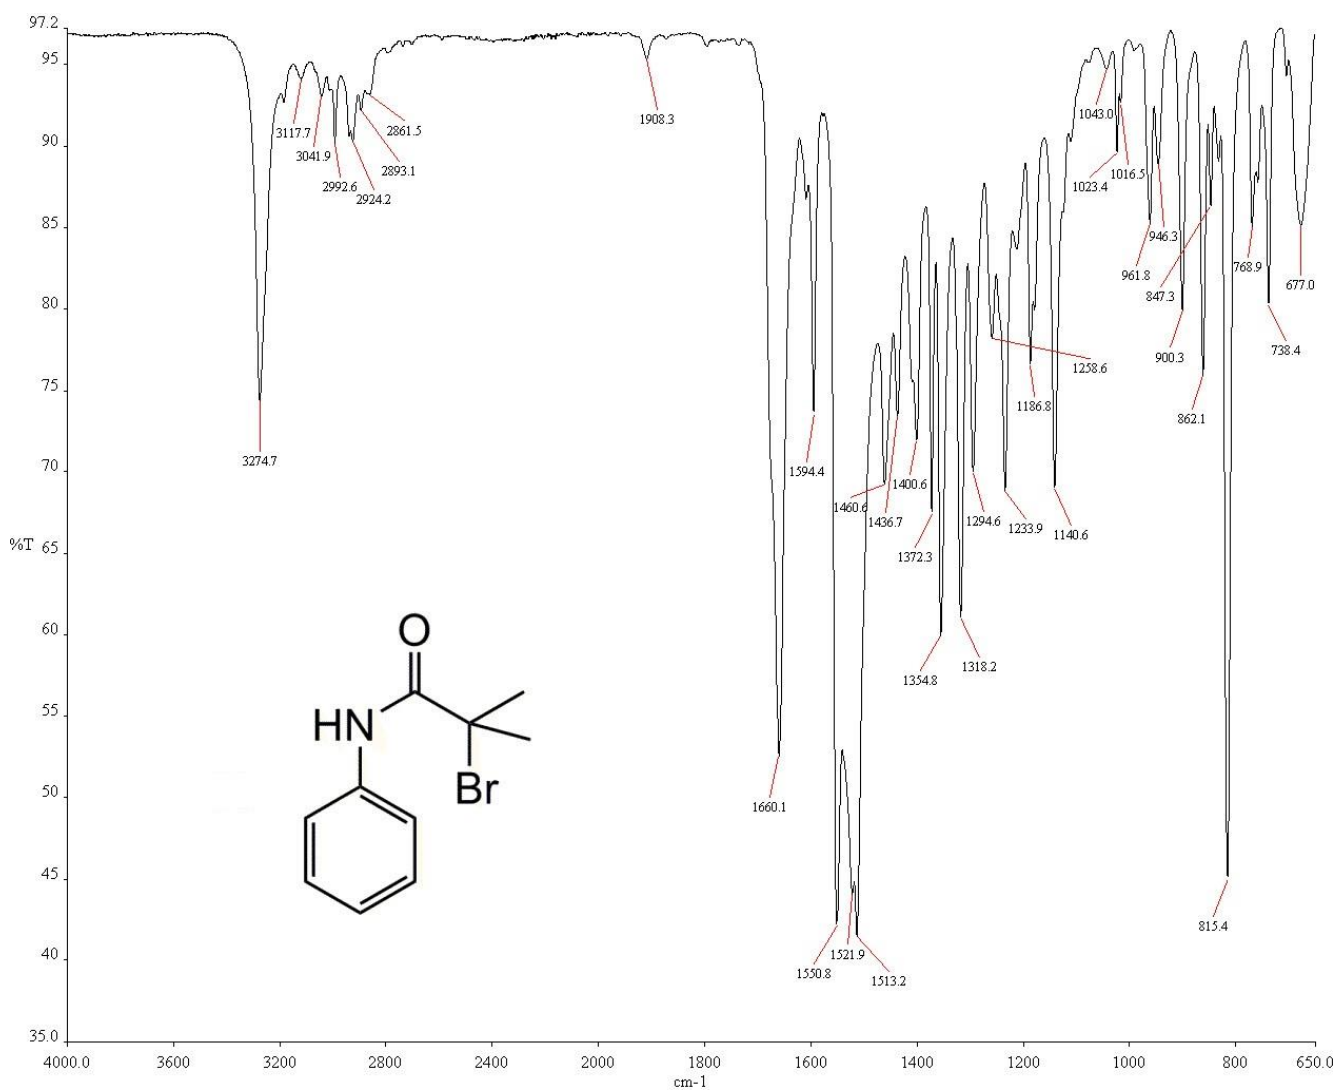

ESI for:

Bromo–nitro substitution on a tertiary  $\alpha$  carbon—a previously uncharacterized facet of the Kornblum substitution

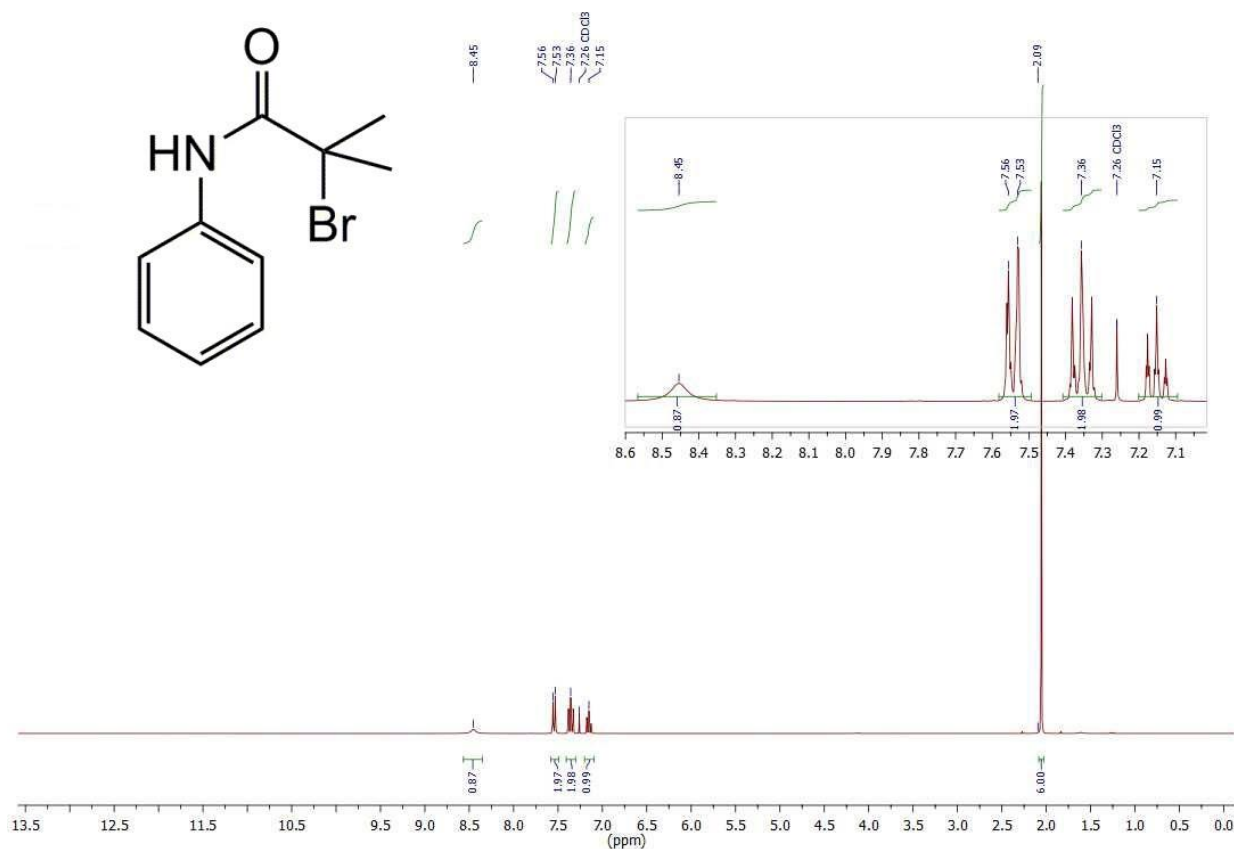

26 mg of **5** in 0.4 mL CDCl<sub>3</sub>, 300 MHz, 16 scans

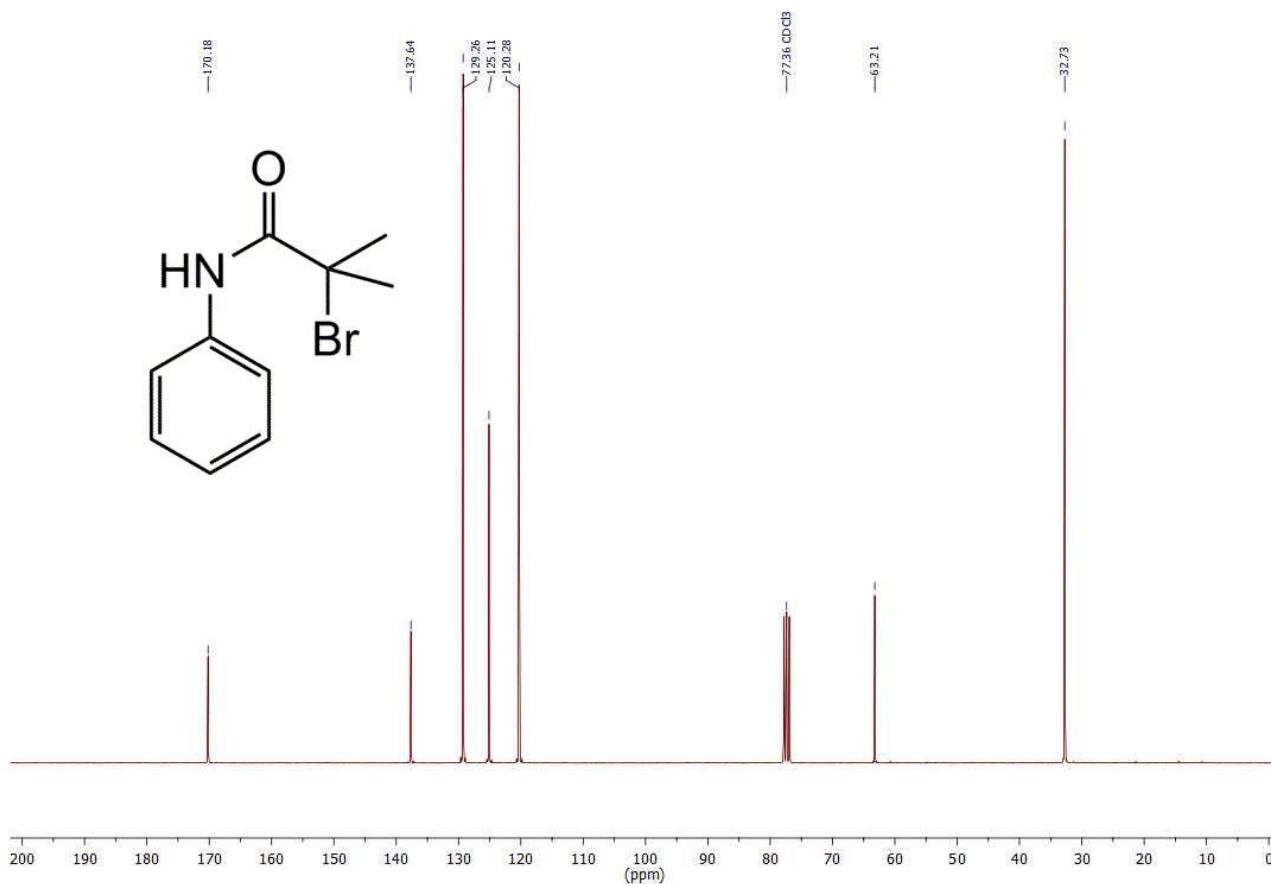

137 mg of **5** in 0.4 mL CDCl<sub>3</sub>, 75 MHz, 21737 scans

ESI for:

Bromo–nitro substitution on a tertiary  $\alpha$  carbon—a previously uncharacterized facet of the Kornblum substitution

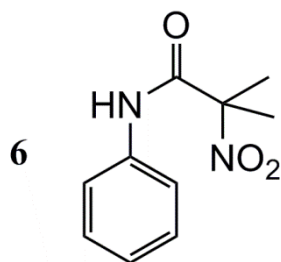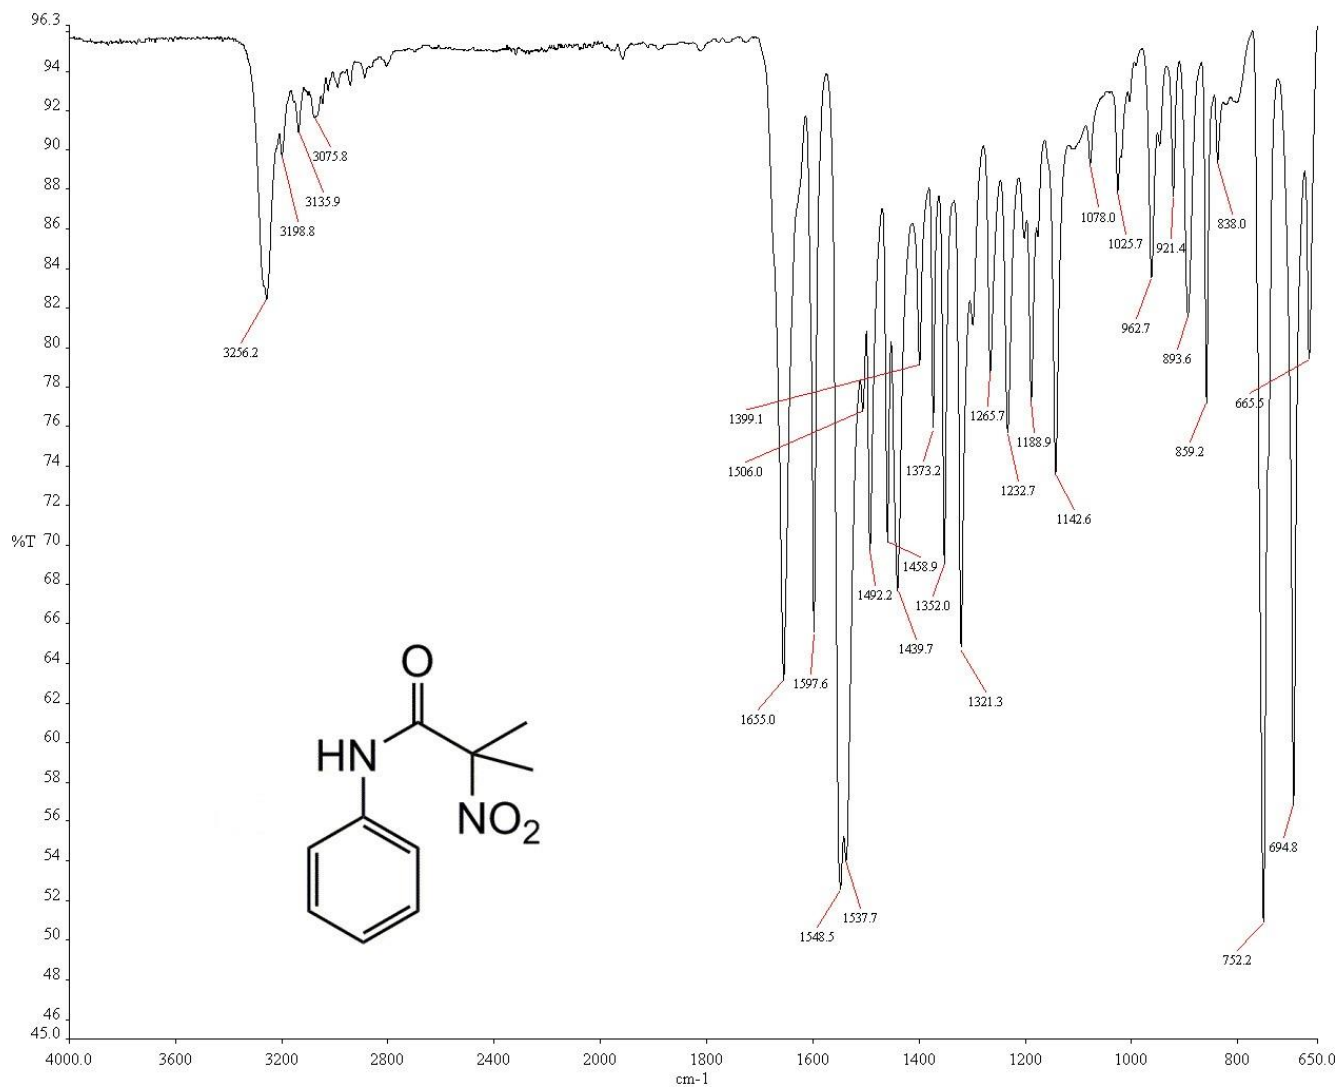

ESI for:

Bromo–nitro substitution on a tertiary  $\alpha$  carbon—a previously uncharacterized facet of the Kornblum substitution

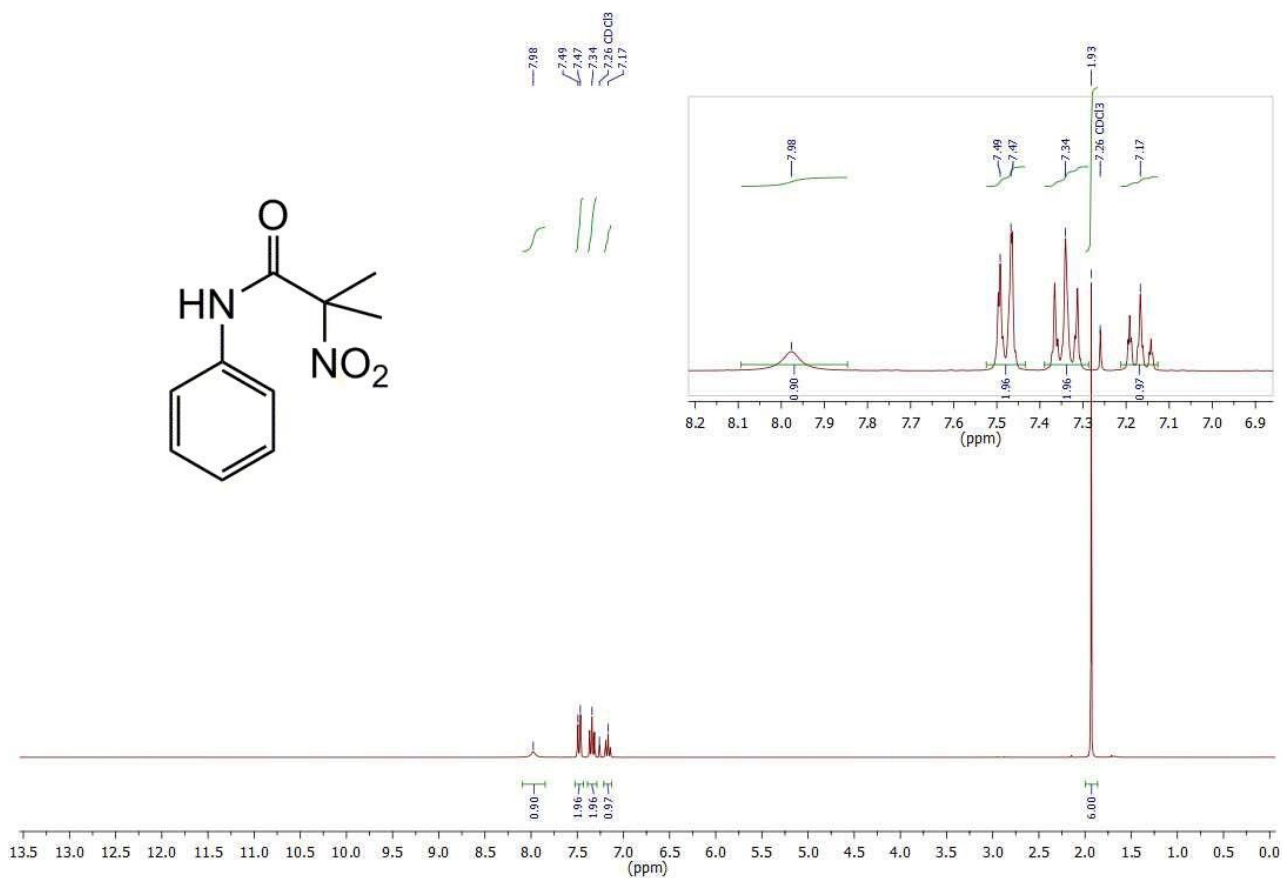

26 mg of **6** in 0.4 mL  $\text{CDCl}_3$ , 300 MHz, 16 scans

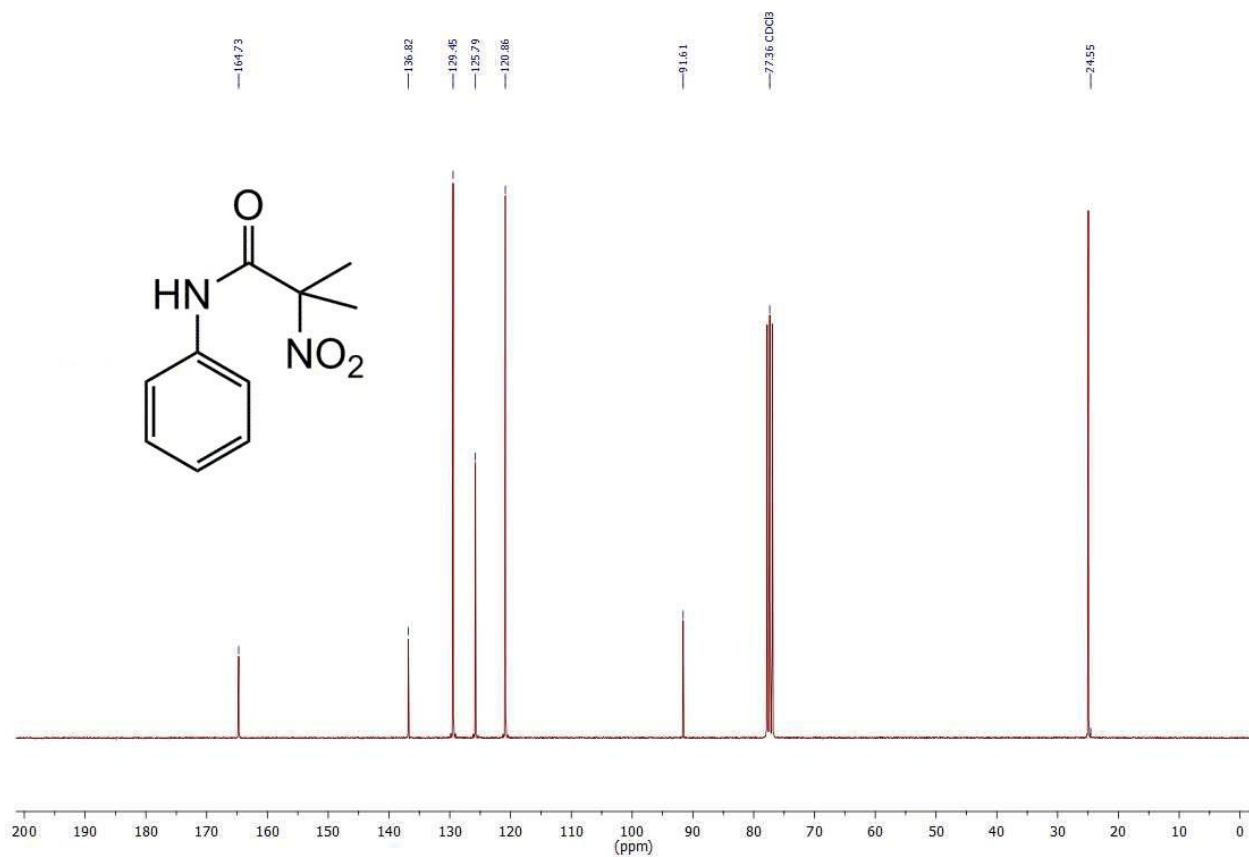

26 mg of **6** in 0.4 mL  $\text{CDCl}_3$ , 75 MHz, 14000 scans



ESI for:

Bromo–nitro substitution on a tertiary  $\alpha$  carbon—a previously uncharacterized facet of the Kornblum substitution

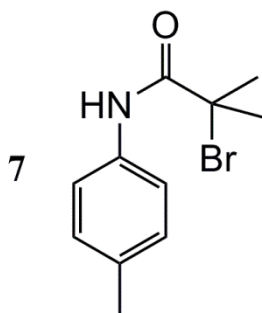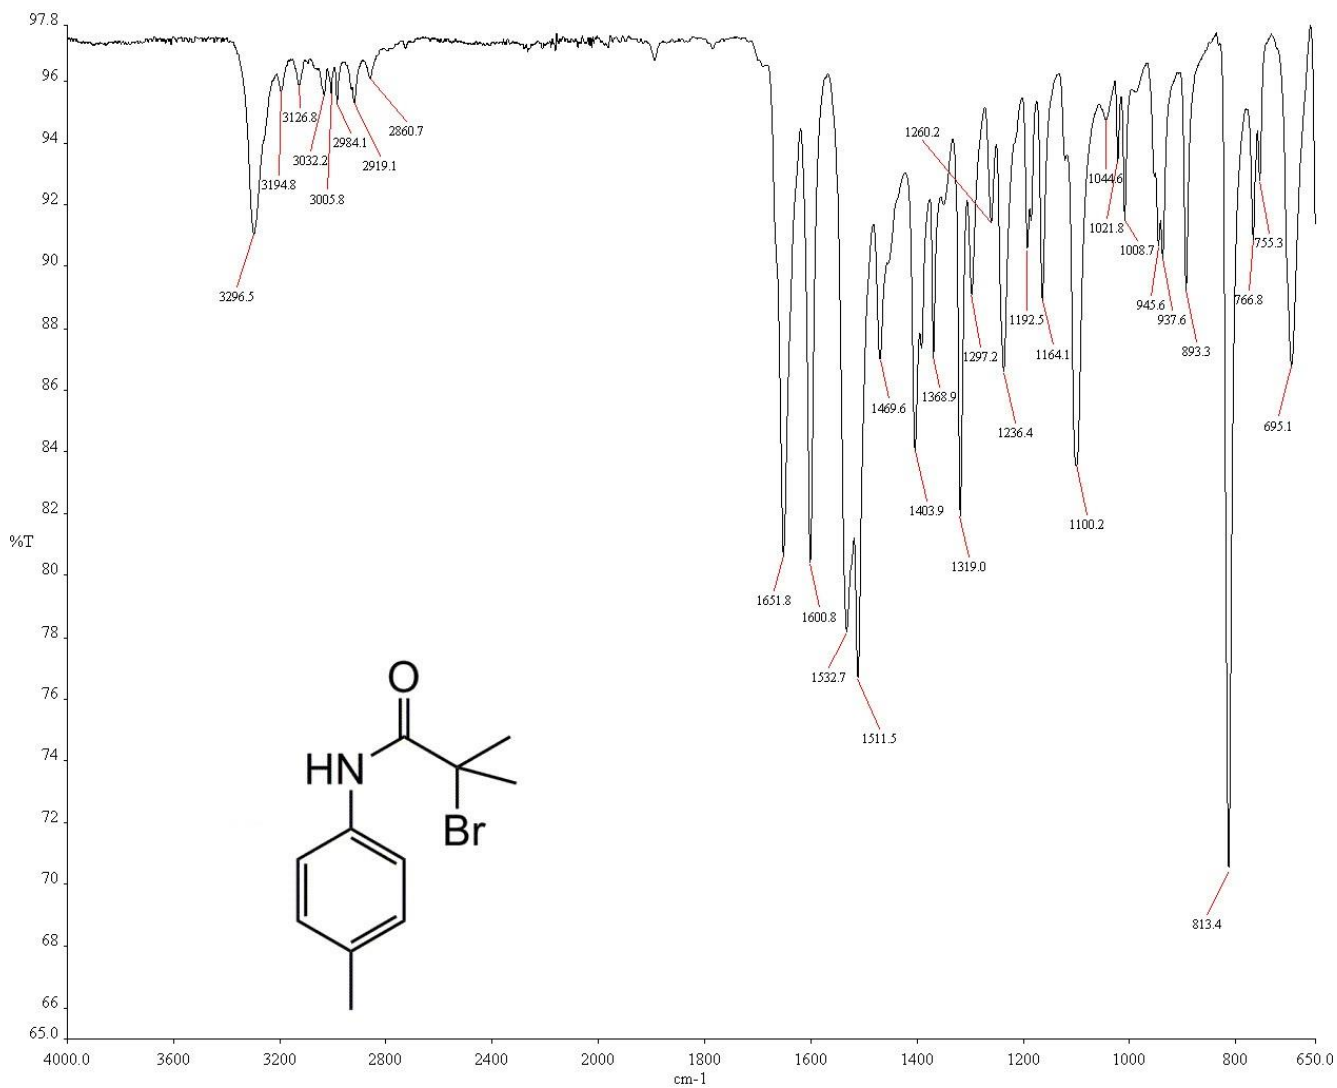

ESI for:

Bromo–nitro substitution on a tertiary  $\alpha$  carbon—a previously uncharacterized facet of the Kornblum substitution

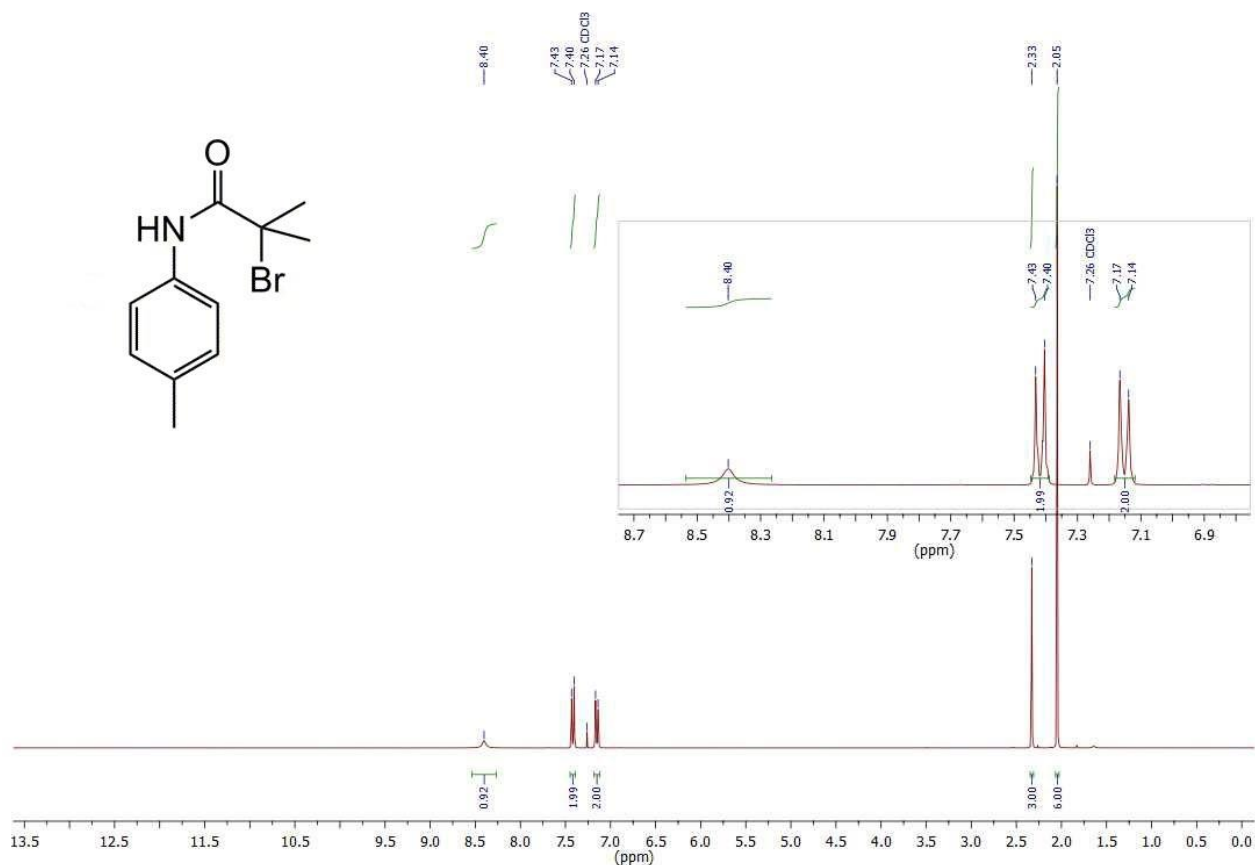

35 mg of **7** in 0.4 mL CDCl<sub>3</sub>, 300 MHz, 16 scans

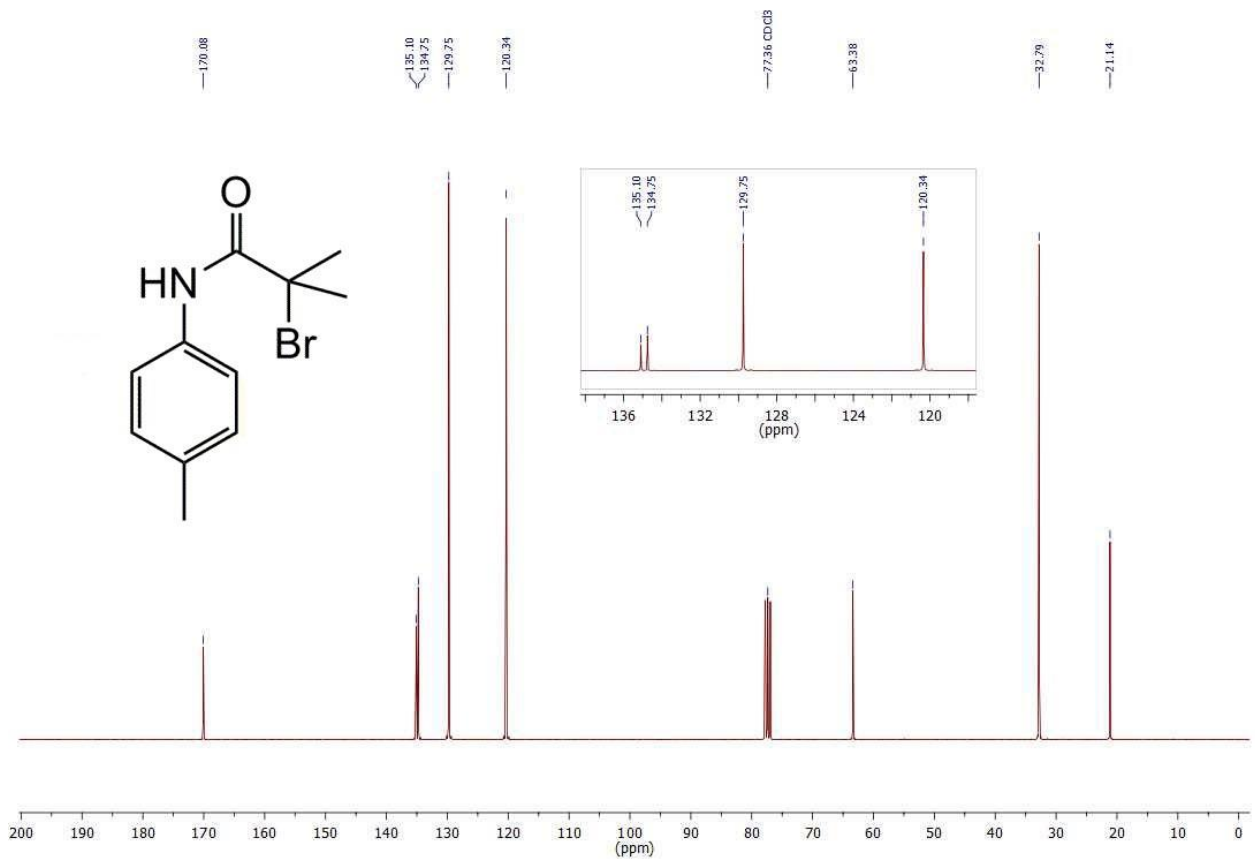

135 mg of **7** in 0.4 mL CDCl<sub>3</sub>, 75 MHz, 14000 scans

ESI for:

Bromo–nitro substitution on a tertiary  $\alpha$  carbon—a previously uncharacterized facet of the Kornblum substitution

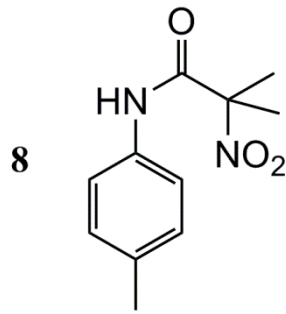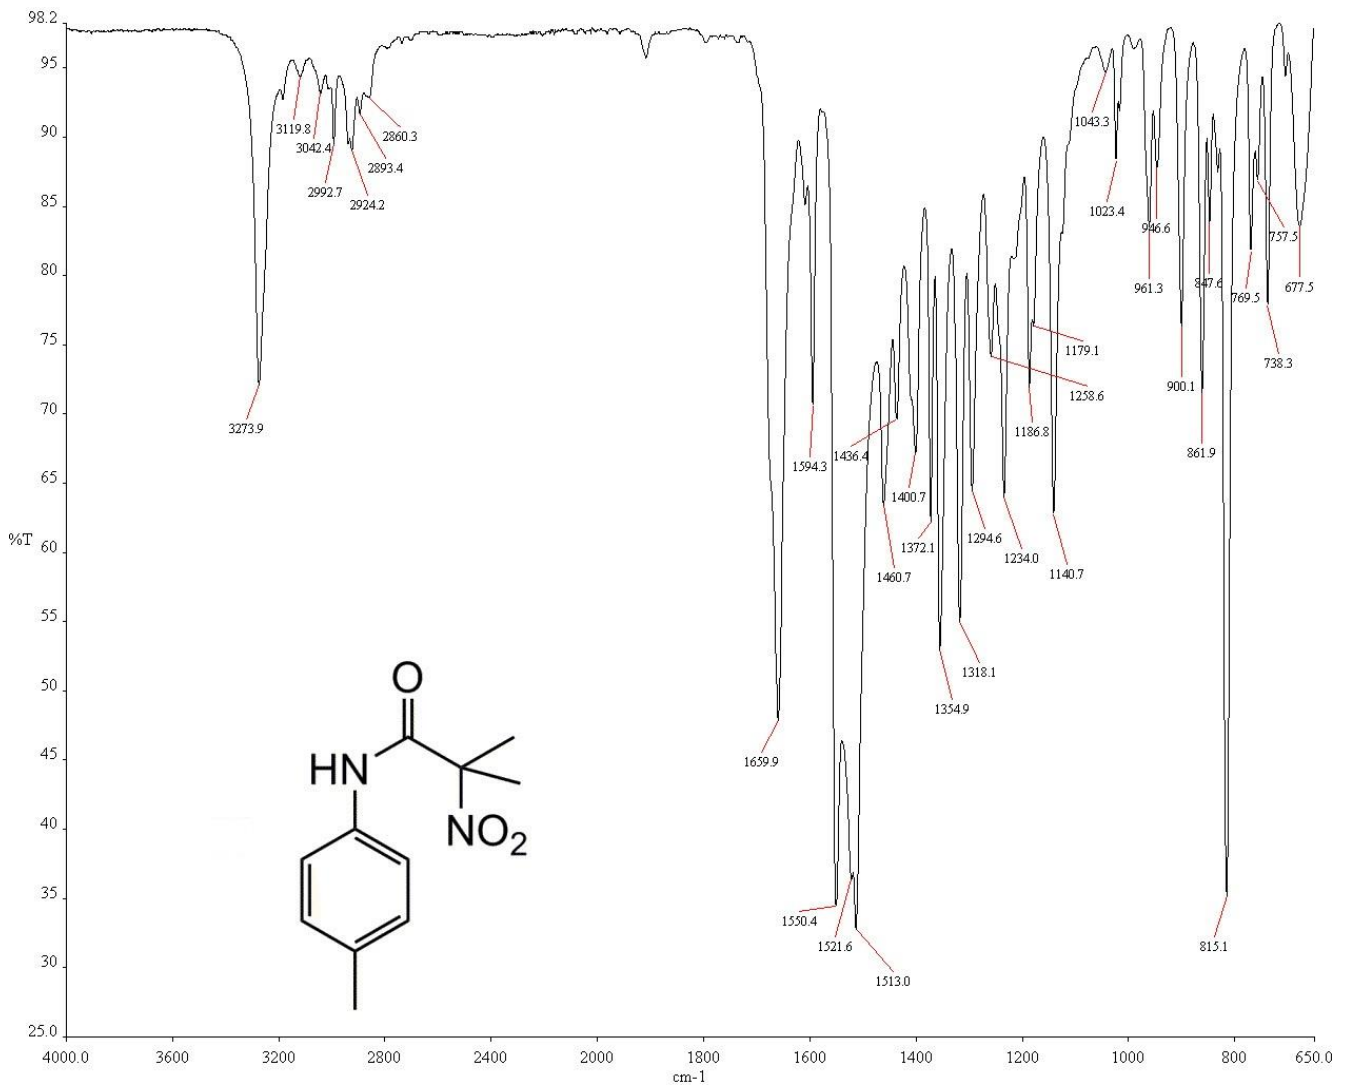

ESI for:

Bromo–nitro substitution on a tertiary  $\alpha$  carbon—a previously uncharacterized facet of the Kornblum substitution

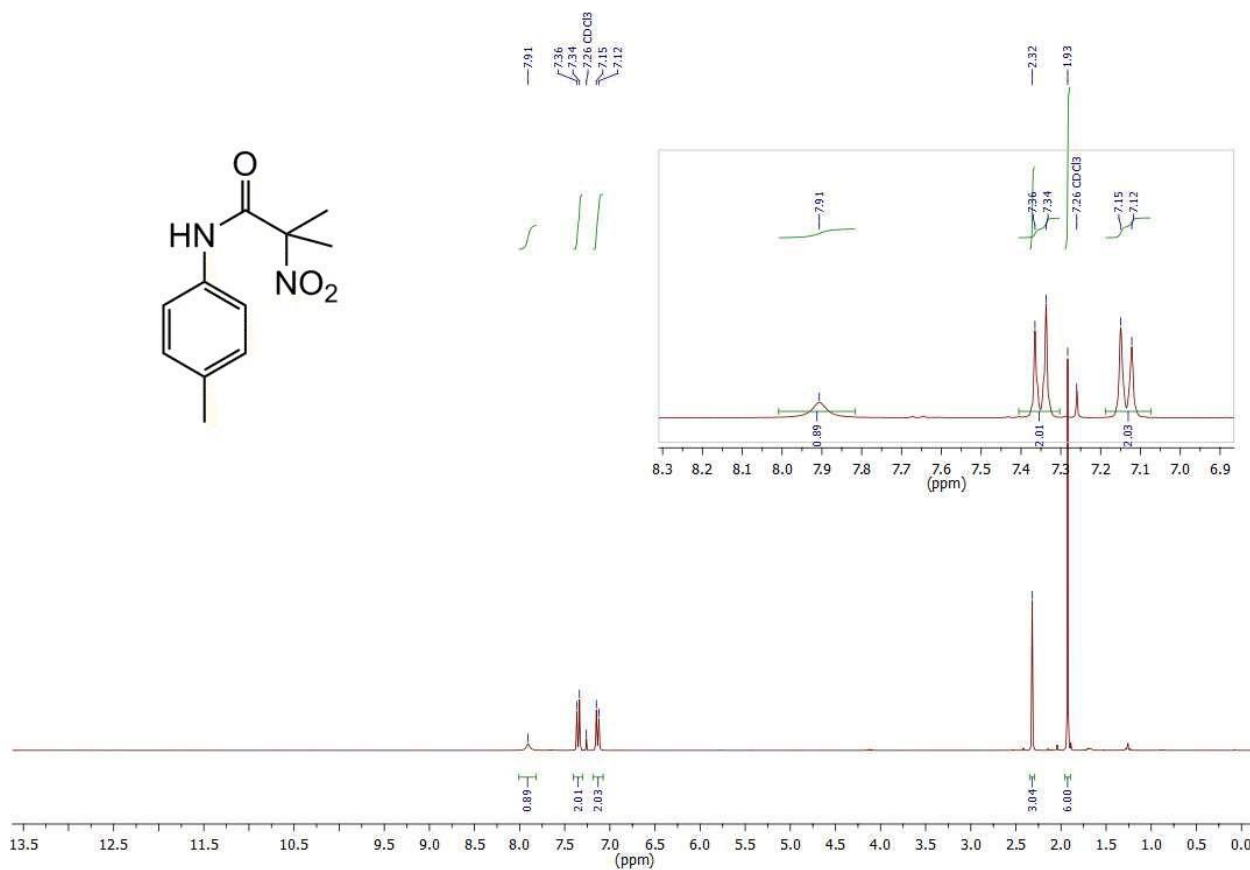

21 mg of **8** in 0.4 mL  $\text{CDCl}_3$ , 300 MHz, 16 scans

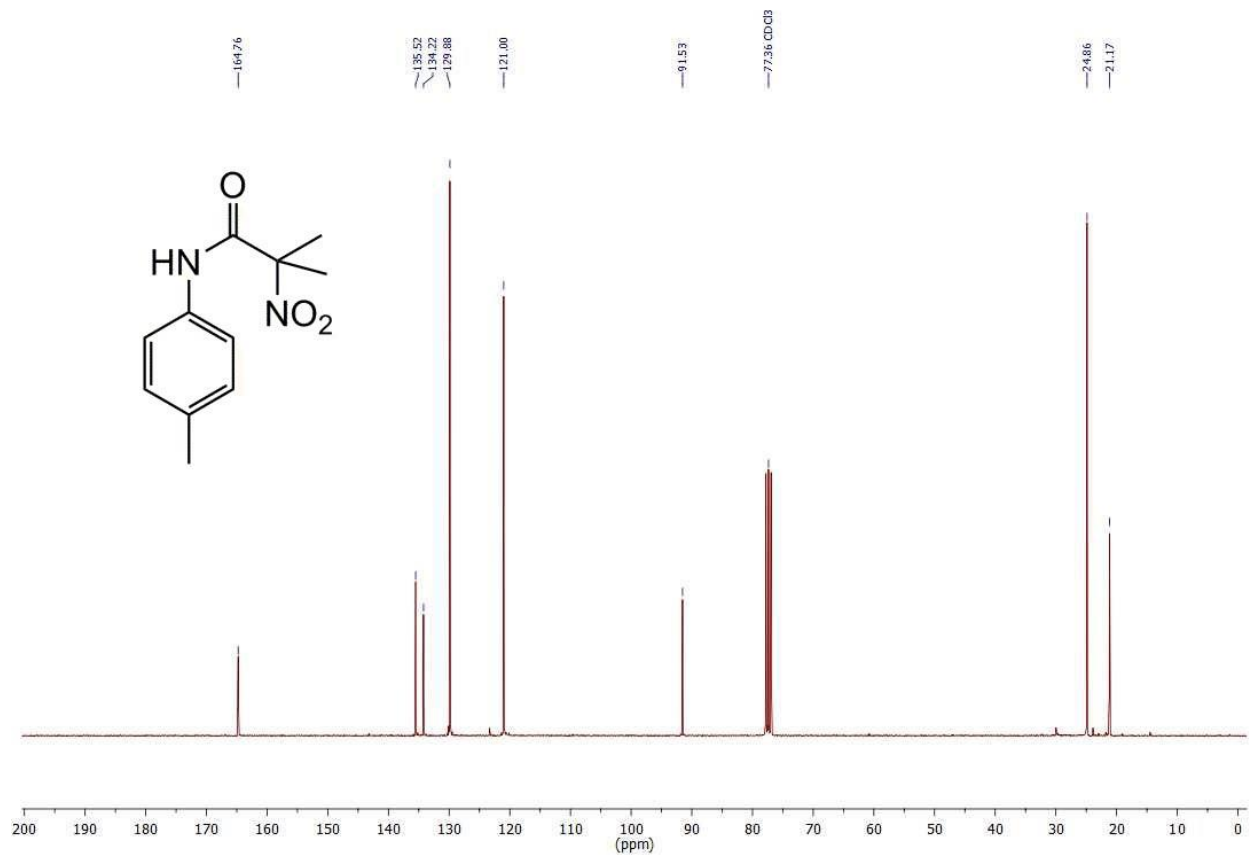

42 mg of **8** in 0.4 mL  $\text{CDCl}_3$ , 75 MHz, 14000 scans

ESI for:

Bromo–nitro substitution on a tertiary  $\alpha$  carbon—a previously uncharacterized facet of the Kornblum substitution

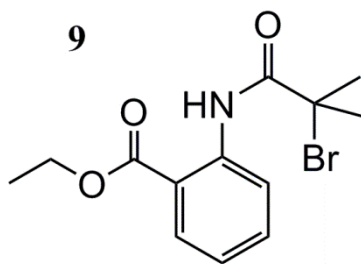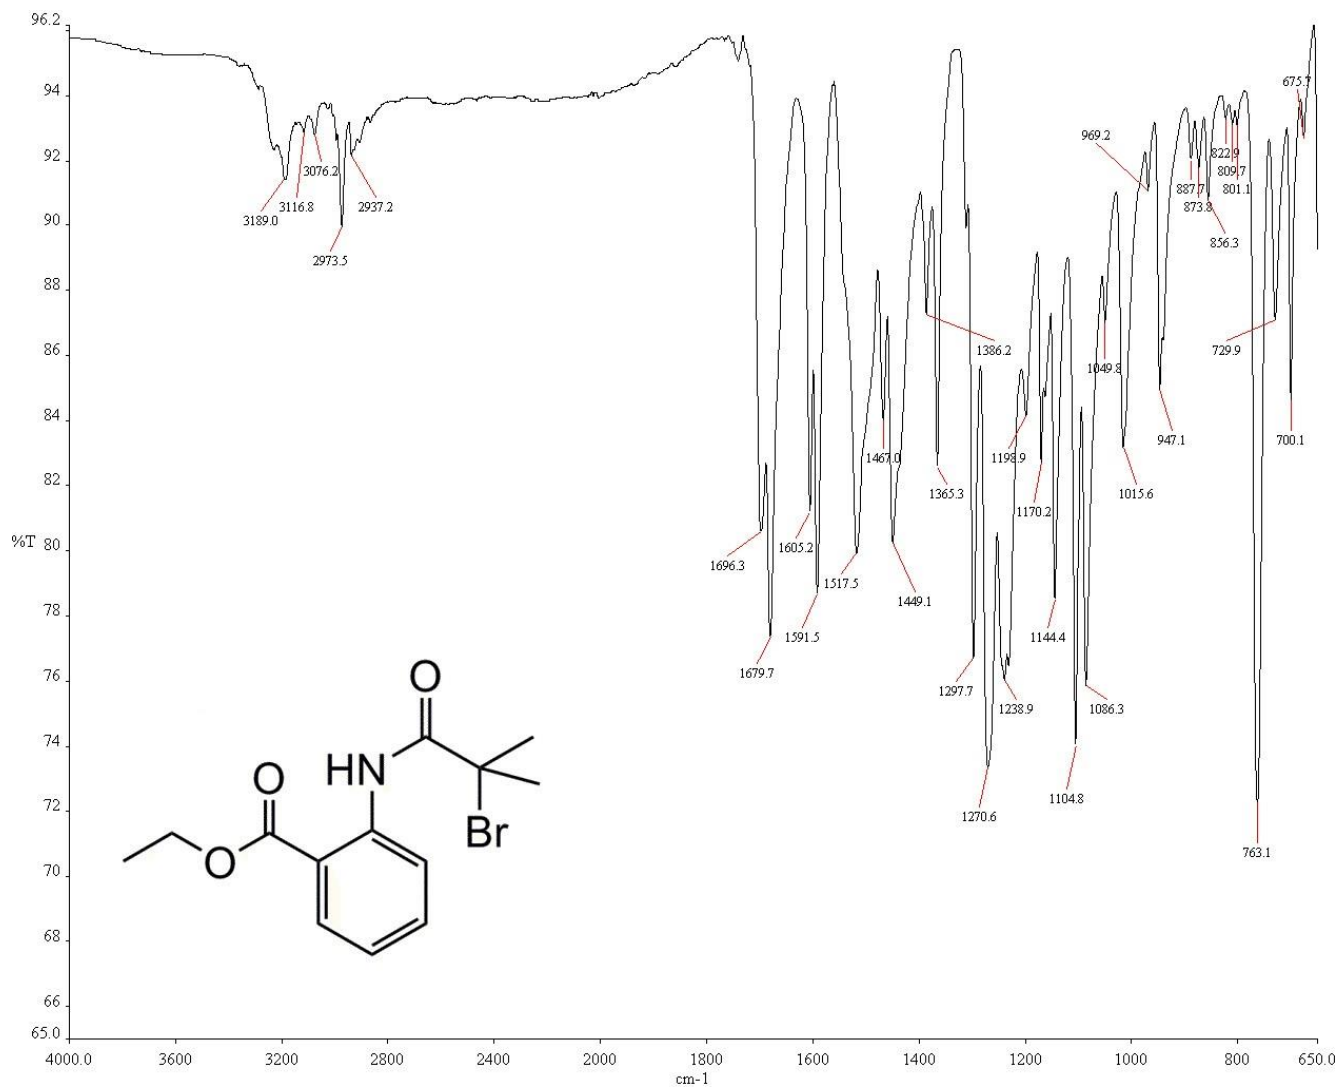

ESI for:

Bromo–nitro substitution on a tertiary  $\alpha$  carbon—a previously uncharacterized facet of the Kornblum substitution

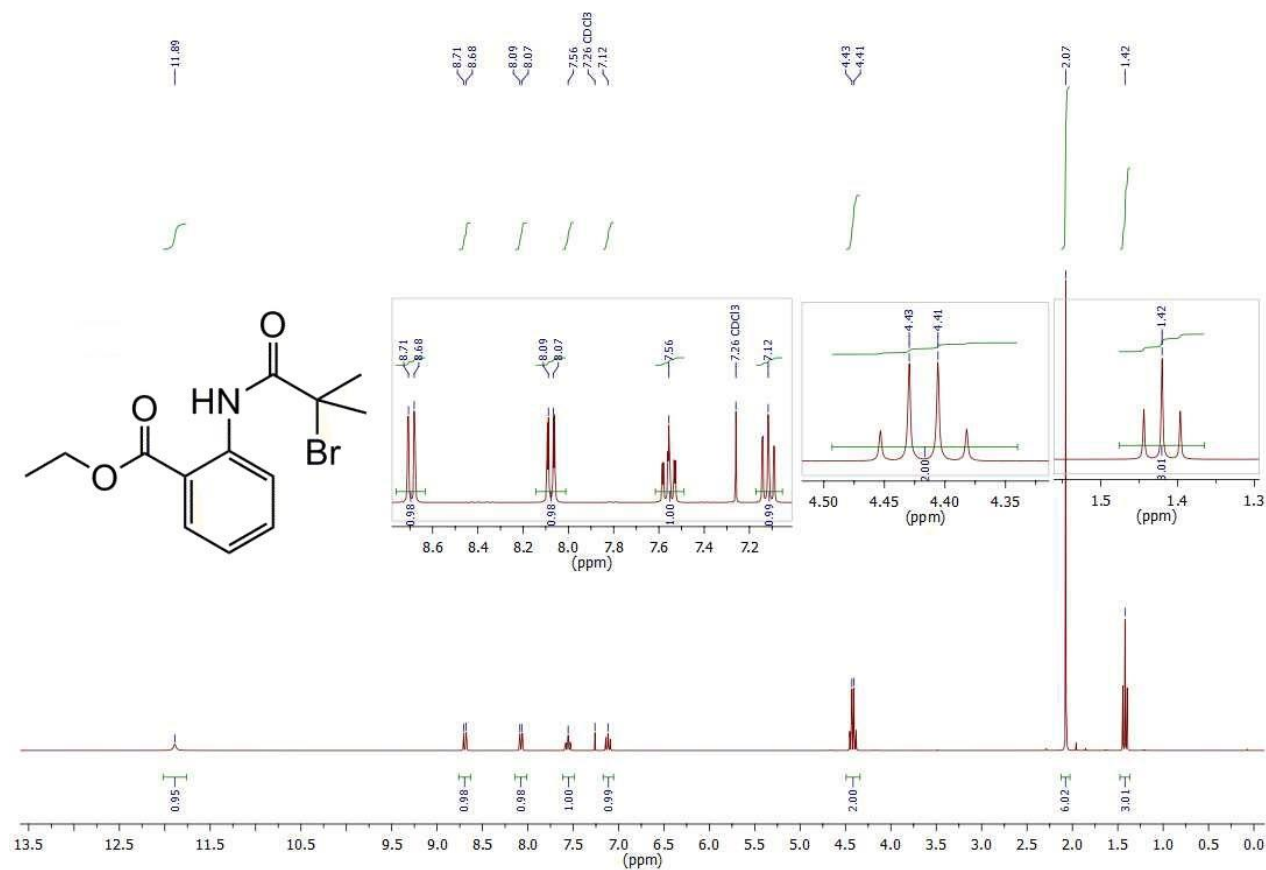

30 mg of **9** in 0.4 mL  $\text{CDCl}_3$ , 300 MHz, 16 scans

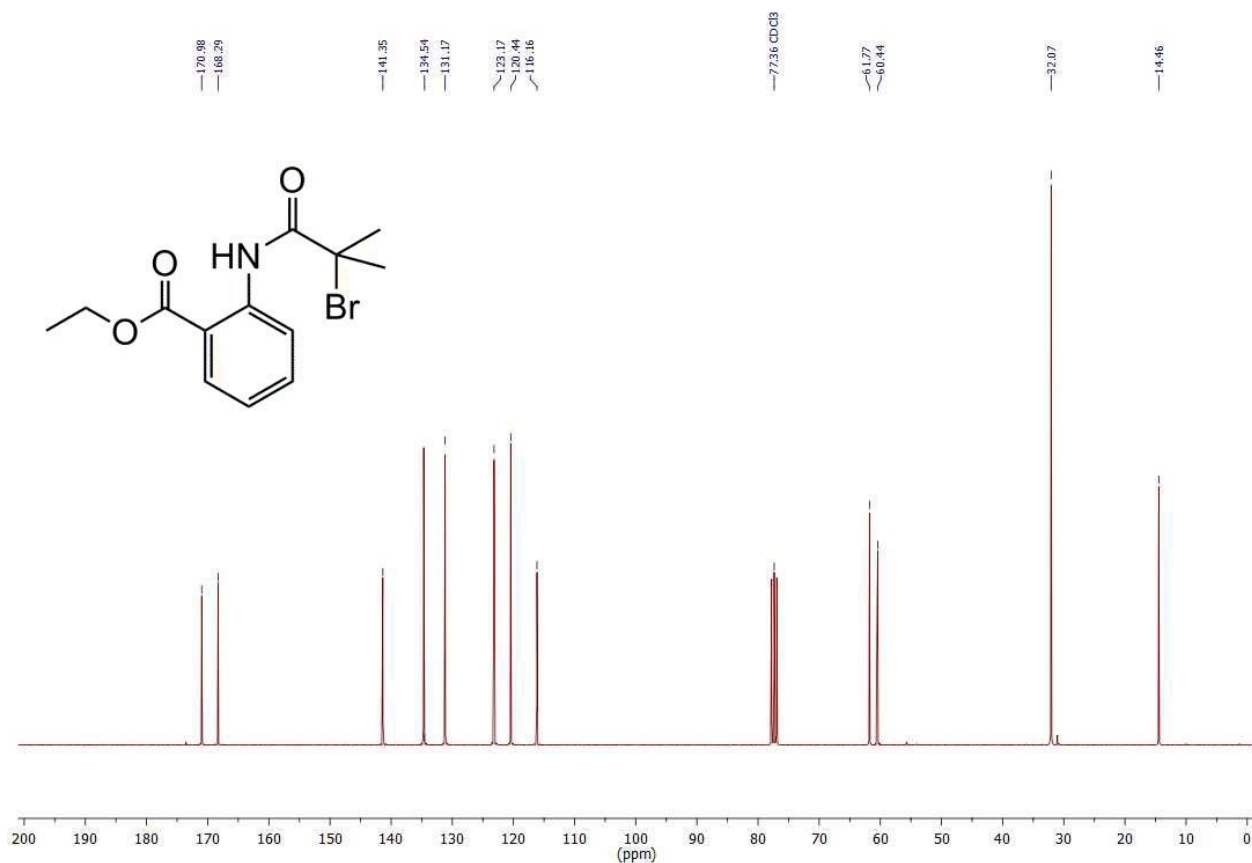

1425 mg of **9** in 0.4 mL  $\text{CDCl}_3$ , 75 MHz, 14000 scans

ESI for:  
Bromo–nitro substitution on a tertiary  $\alpha$  carbon—a previously uncharacterized facet of the Kornblum substitution

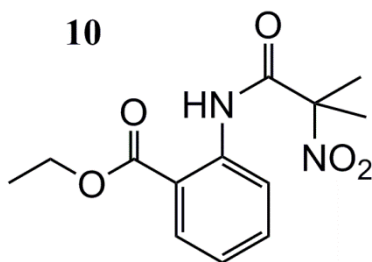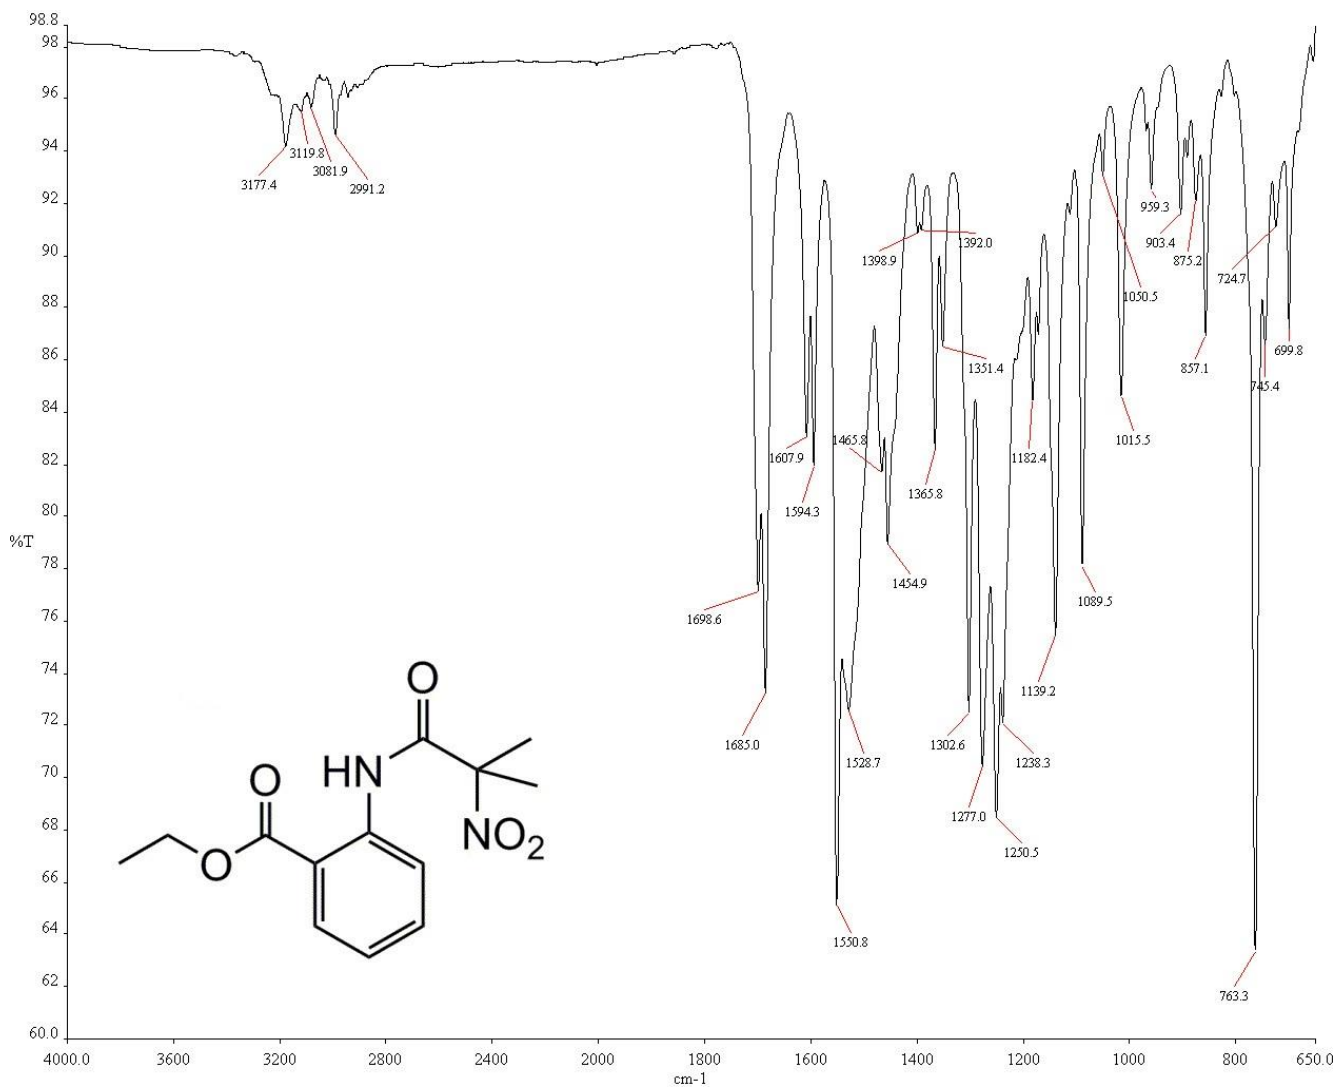

ESI for:

Bromo–nitro substitution on a tertiary  $\alpha$  carbon—a previously uncharacterized facet of the Kornblum substitution

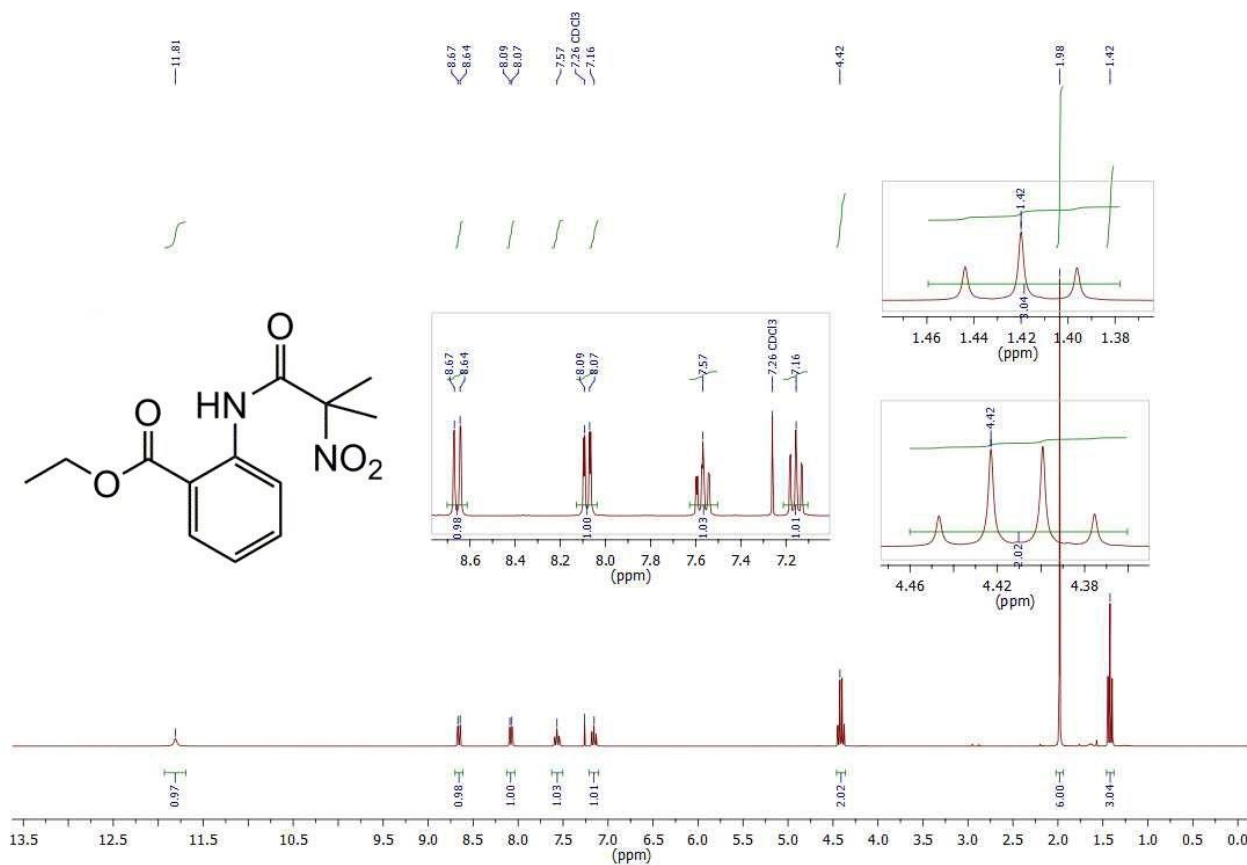

25 mg of **10** in 0.4 mL  $\text{CDCl}_3$ , 300 MHz, 16 scans

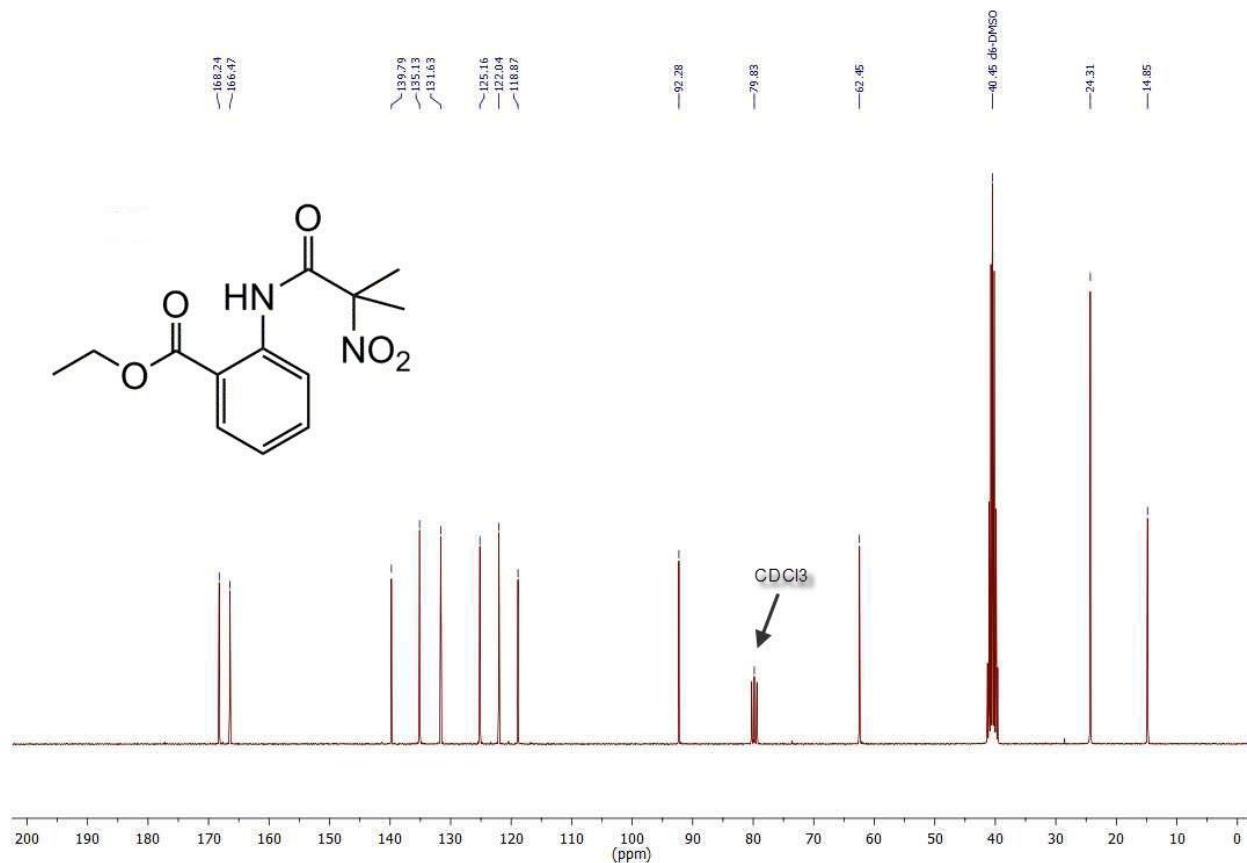

68 mg of **10** in 0.4 mL  $\text{d}_6\text{-DMSO}$ /0.1 mL  $\text{CDCl}_3$ , 75 MHz, 14000 scans



ESI for:

Bromo-nitro substitution on a tertiary  $\alpha$  carbon—a previously uncharacterized facet of the Kornblum substitution

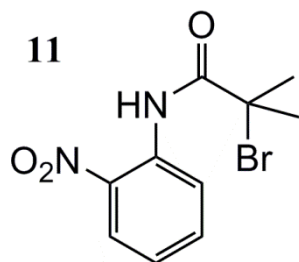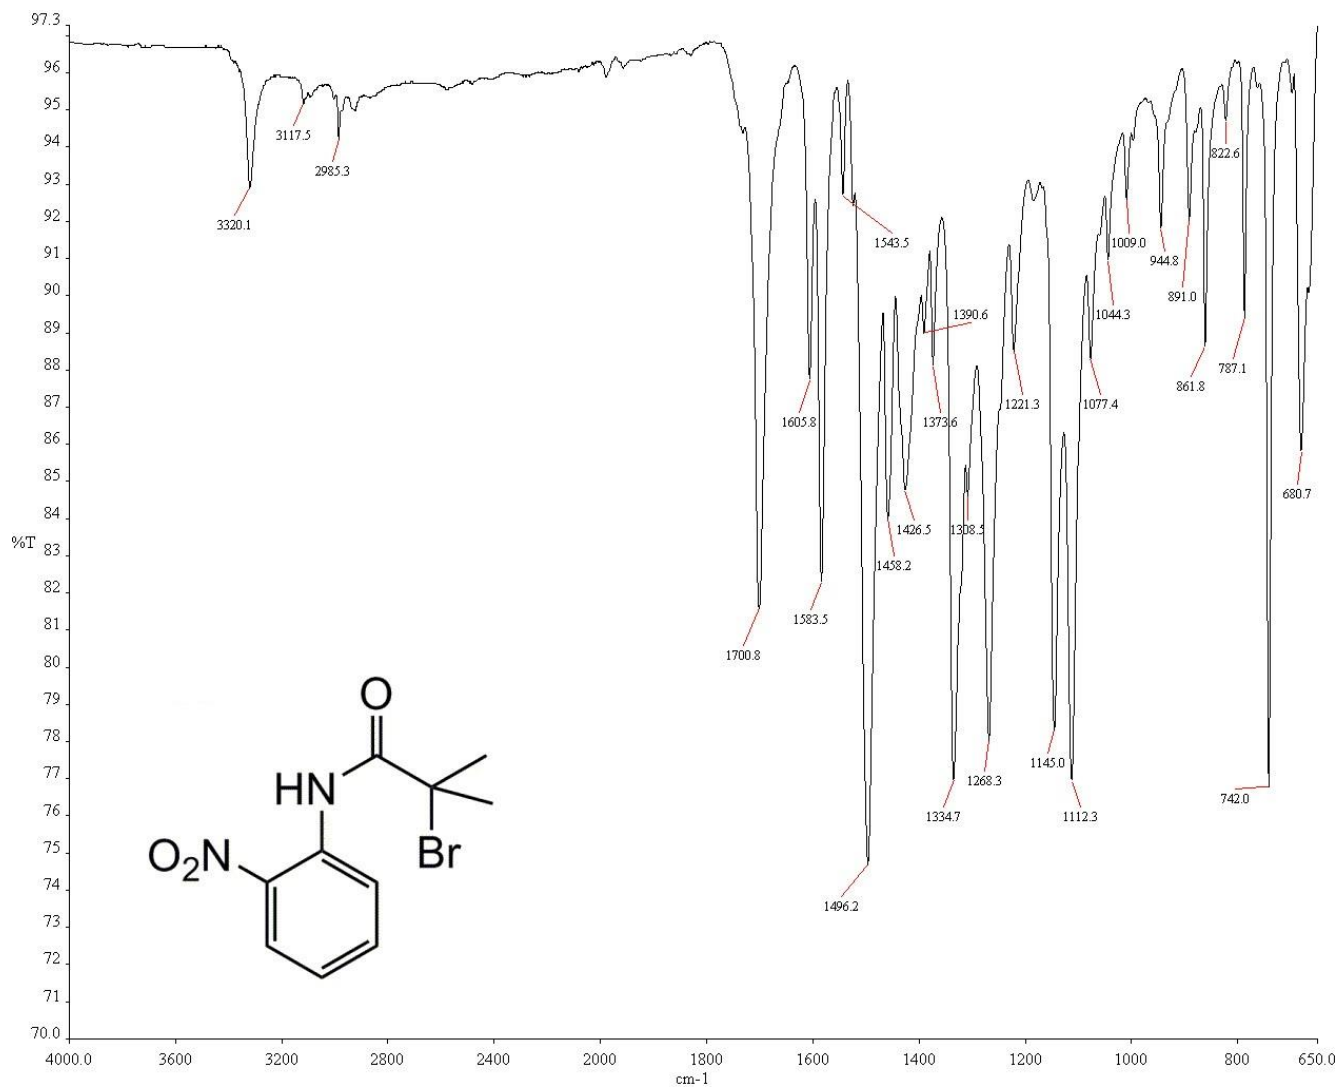

ESI for:

Bromo–nitro substitution on a tertiary  $\alpha$  carbon—a previously uncharacterized facet of the Kornblum substitution

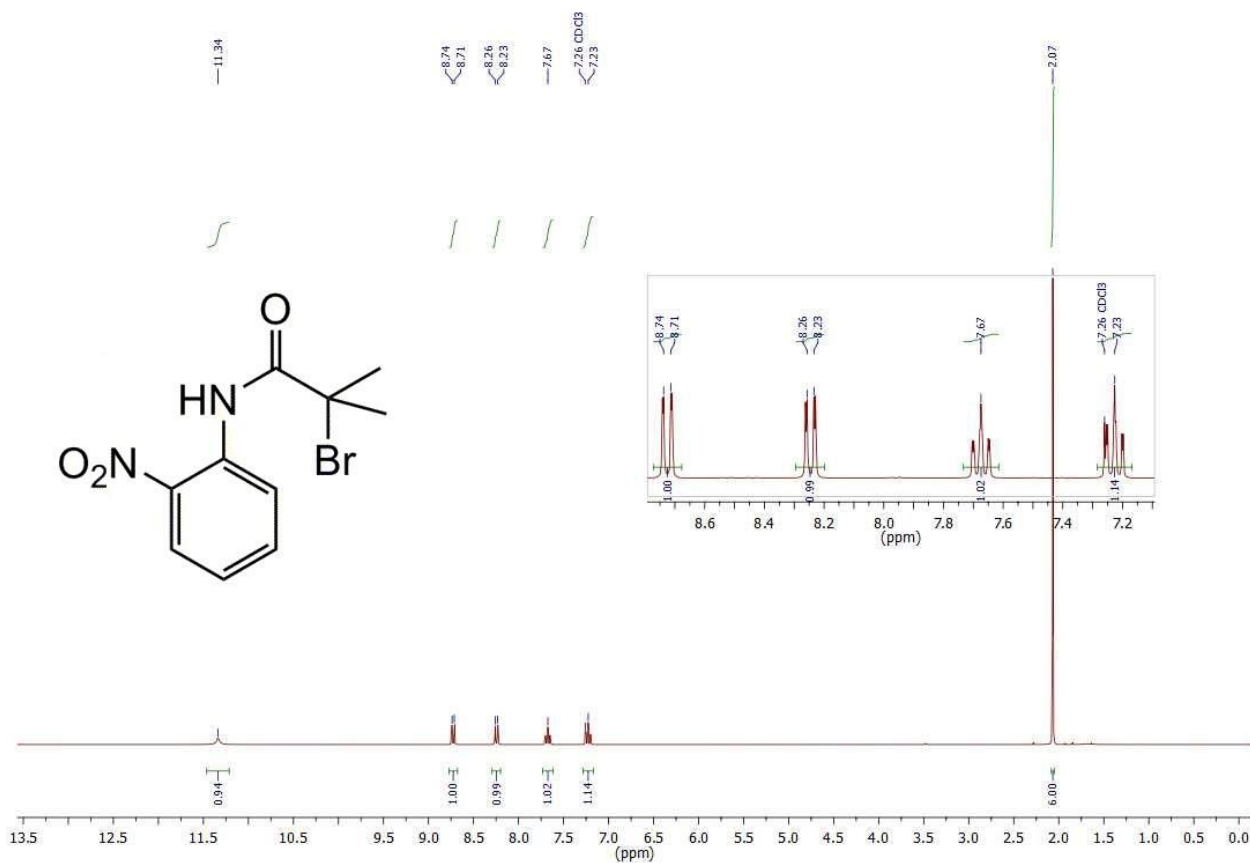

32 mg of **11** in 0.4 mL  $\text{CDCl}_3$ , 300 MHz, 32 scans

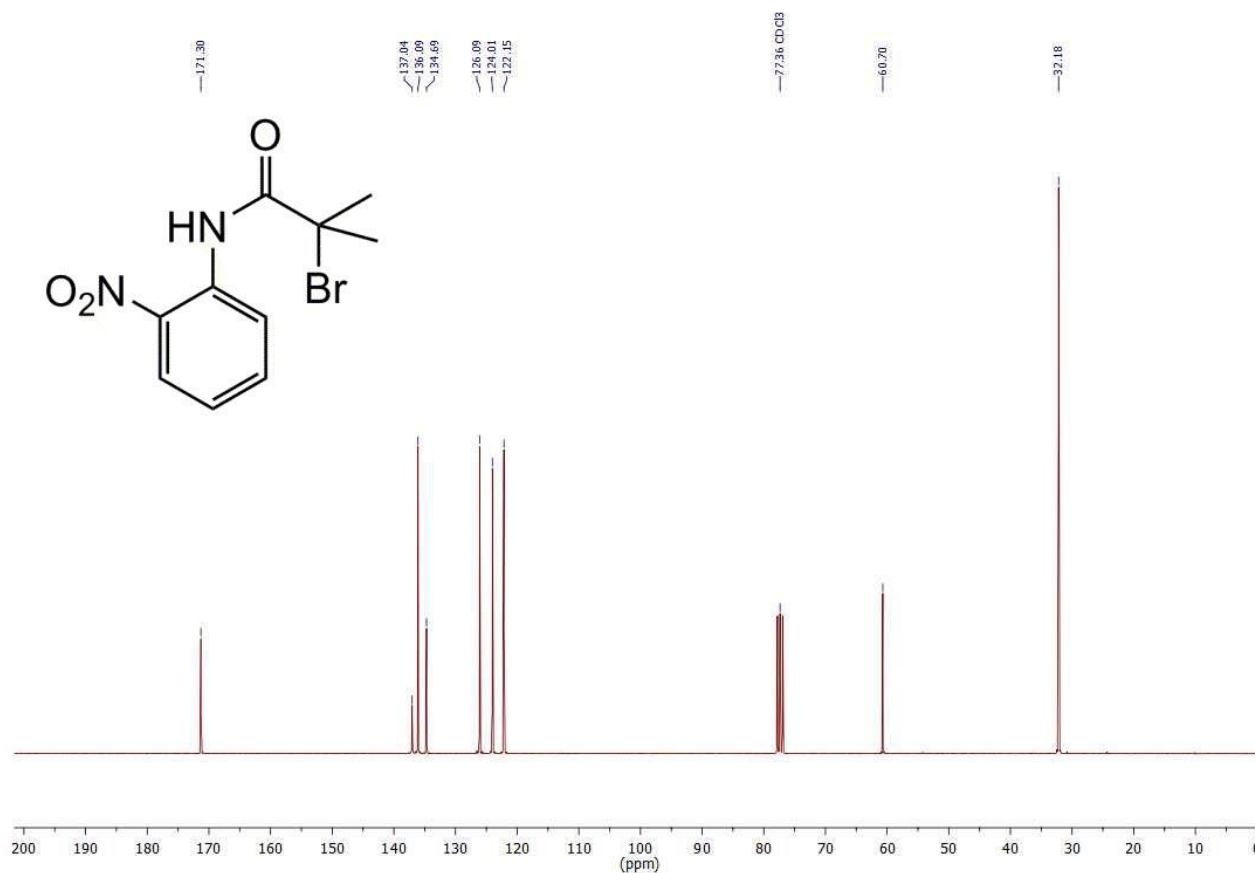

138 mg of **11** in 0.4 mL  $\text{CDCl}_3$ , 75 MHz, 14000 scans

ESI for:

Bromo–nitro substitution on a tertiary  $\alpha$  carbon—a previously uncharacterized facet of the Kornblum substitution

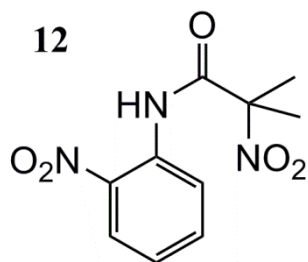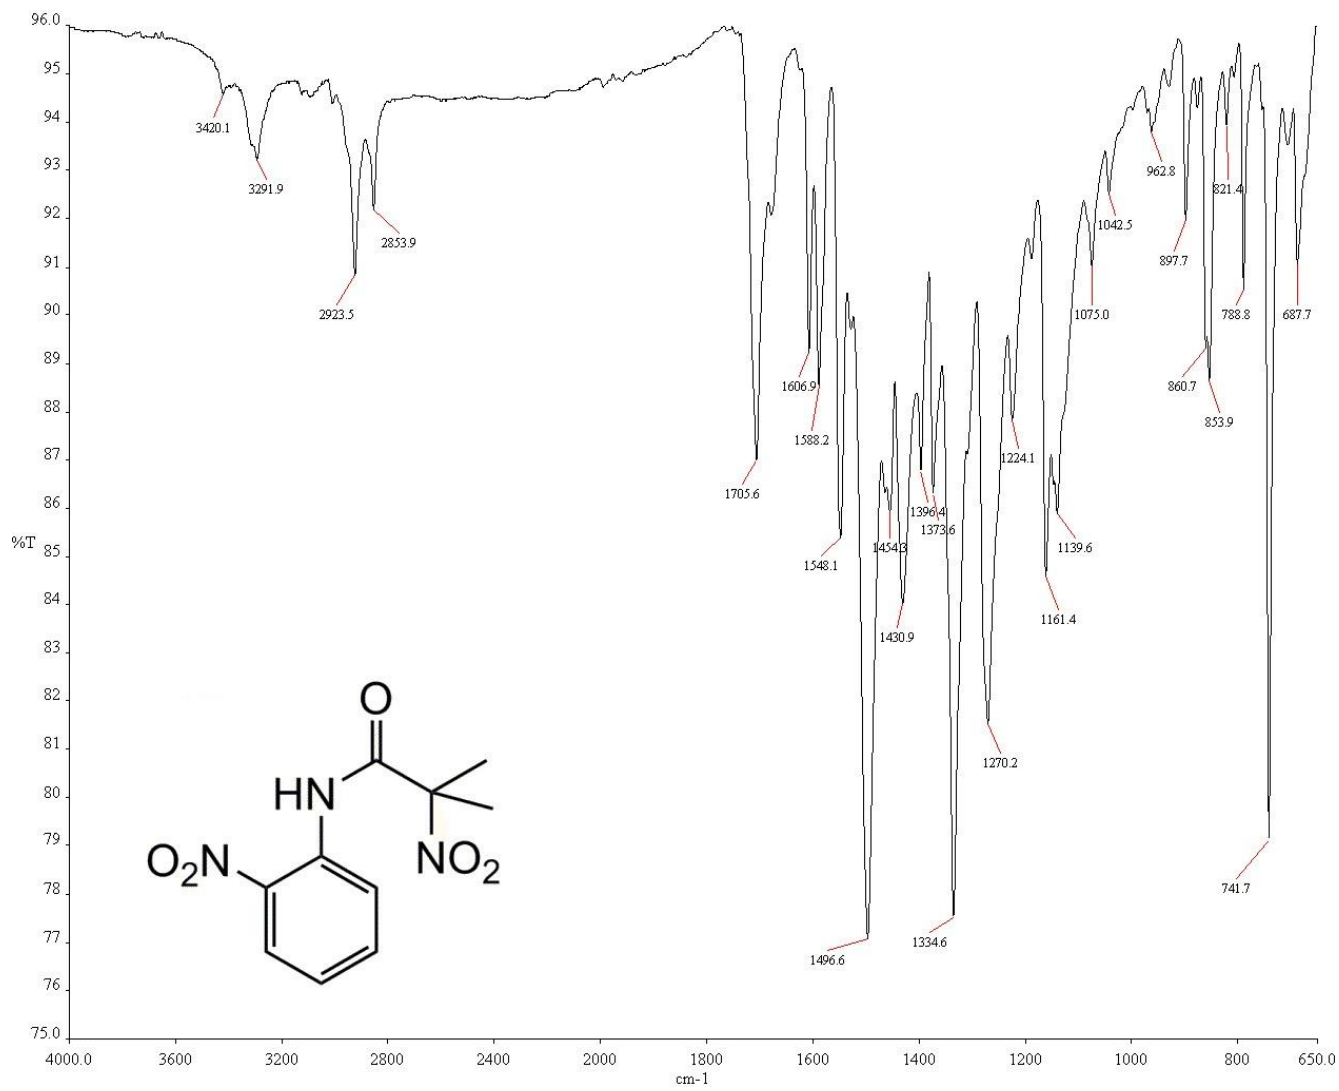

ESI for:

Bromo–nitro substitution on a tertiary  $\alpha$  carbon—a previously uncharacterized facet of the Kornblum substitution

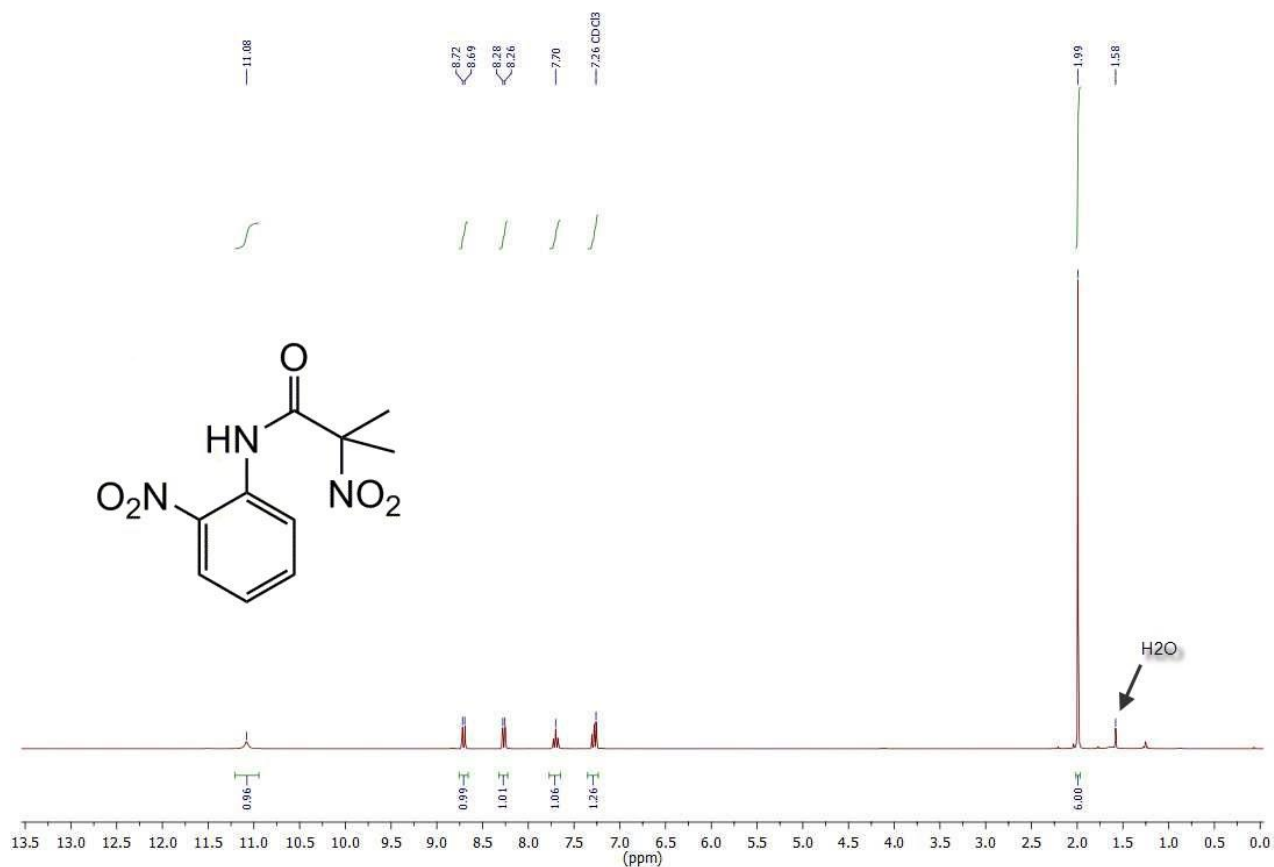

18 mg of **12** in 0.4 mL CDCl<sub>3</sub>, 300 MHz, 16 scans

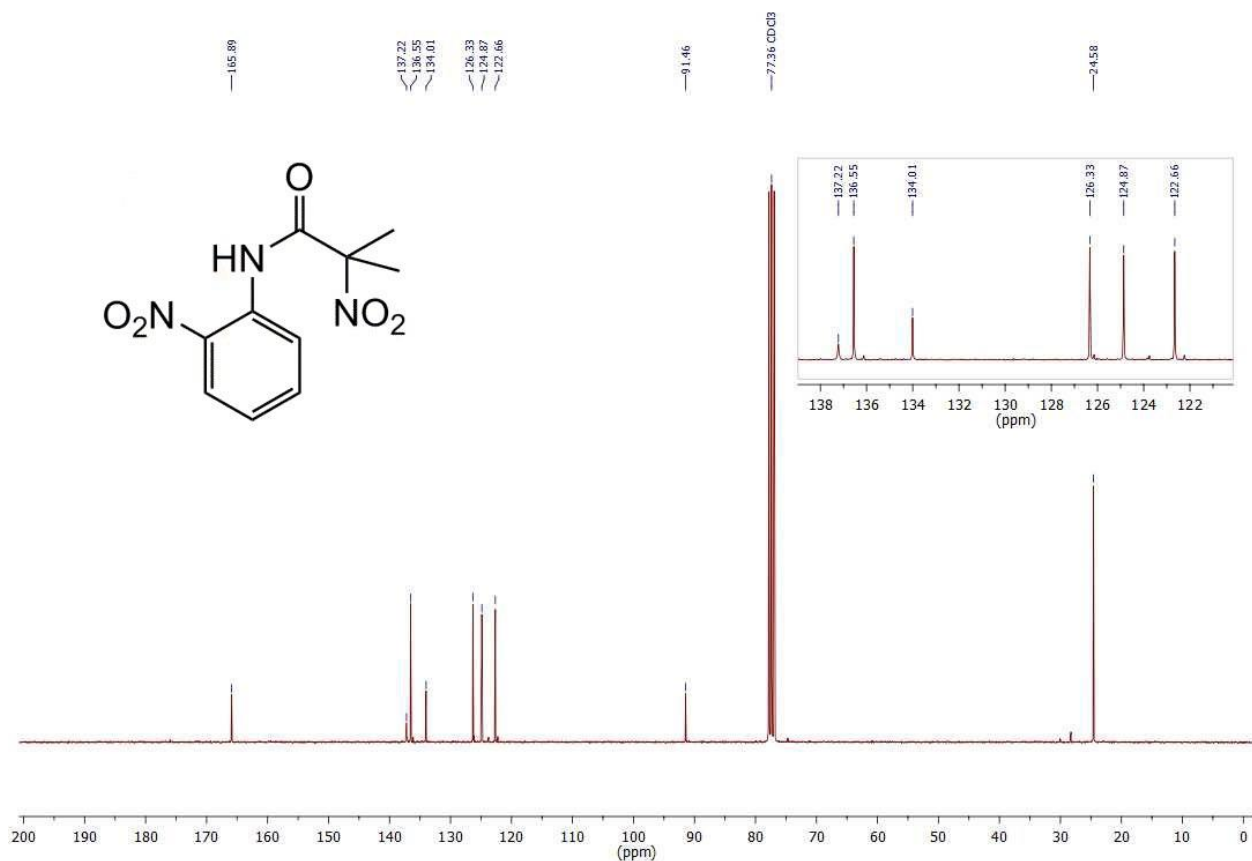

18 mg of **12** in 0.4 mL CDCl<sub>3</sub>, 75 MHz, 14000 scans

ESI for:

Bromo–nitro substitution on a tertiary  $\alpha$  carbon—a previously uncharacterized facet of the Kornblum substitution

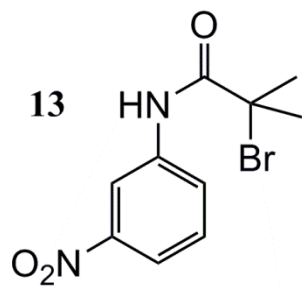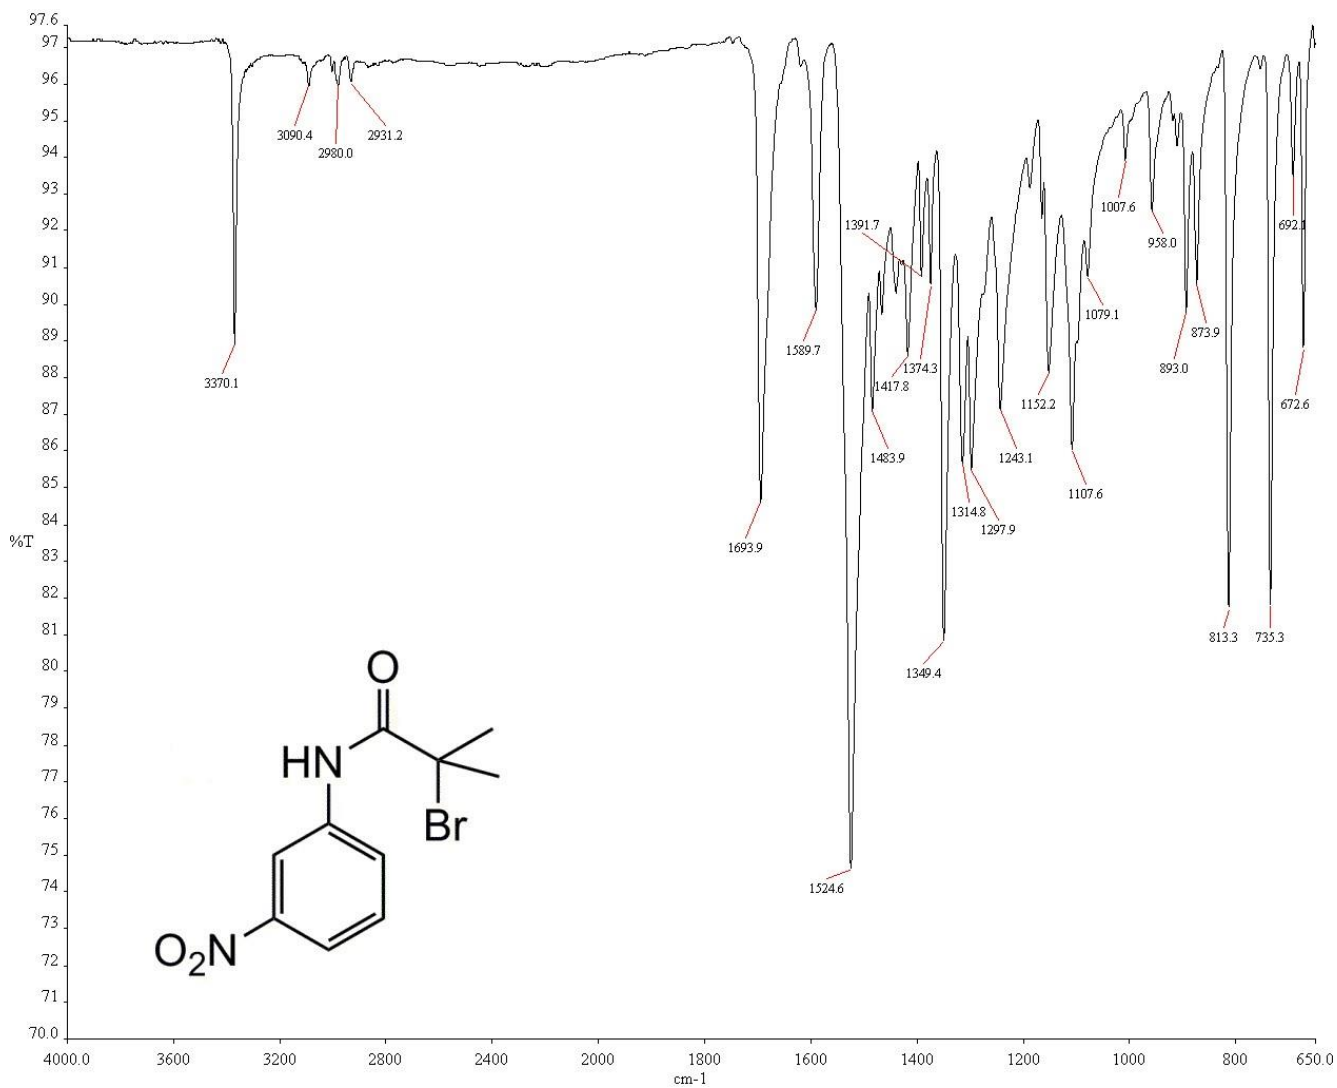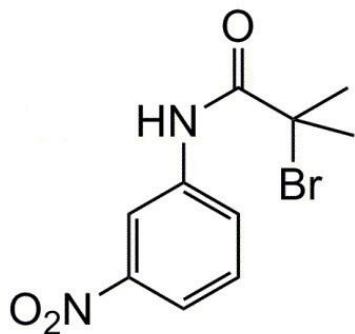

ESI for:

Bromo–nitro substitution on a tertiary  $\alpha$  carbon—a previously uncharacterized facet of the Kornblum substitution

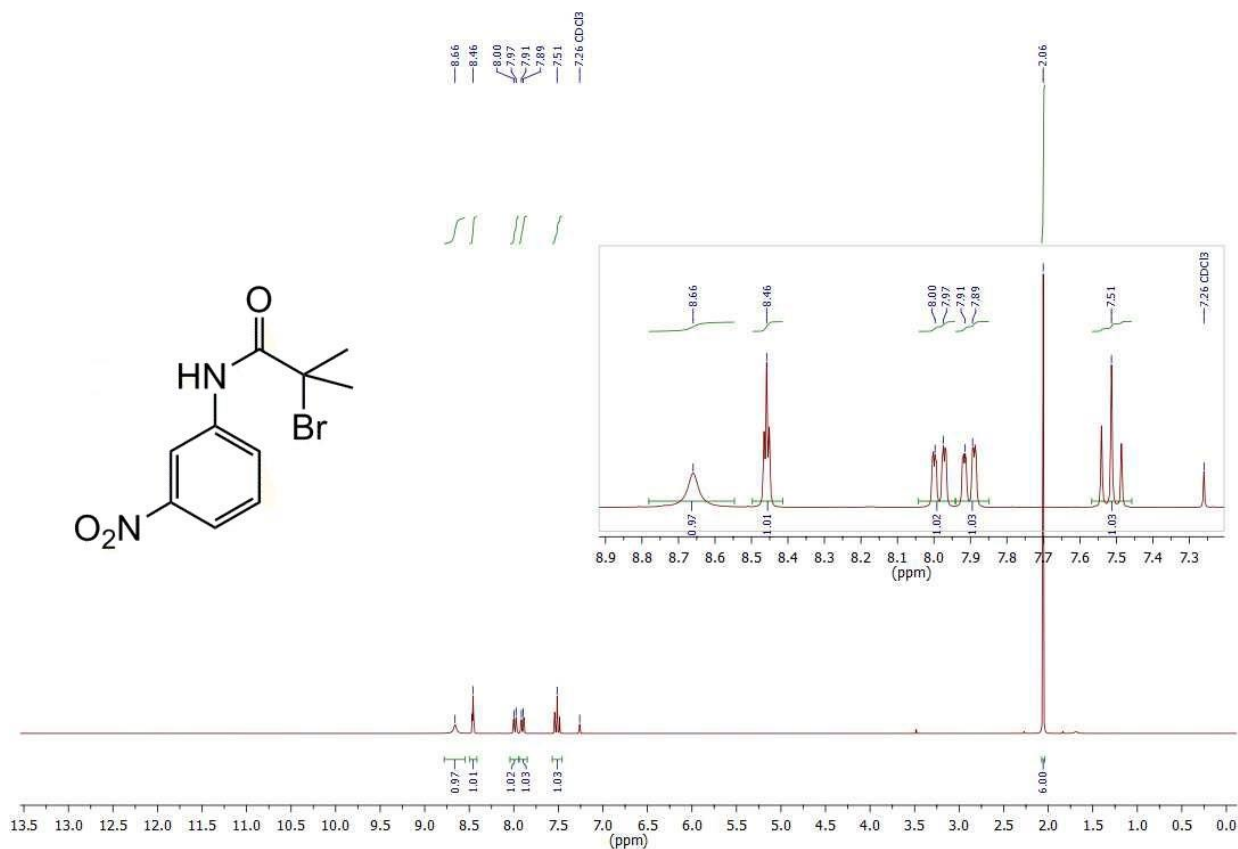

45 mg of **13** in 0.4 mL  $\text{CDCl}_3$ , 300 MHz, 32 scans

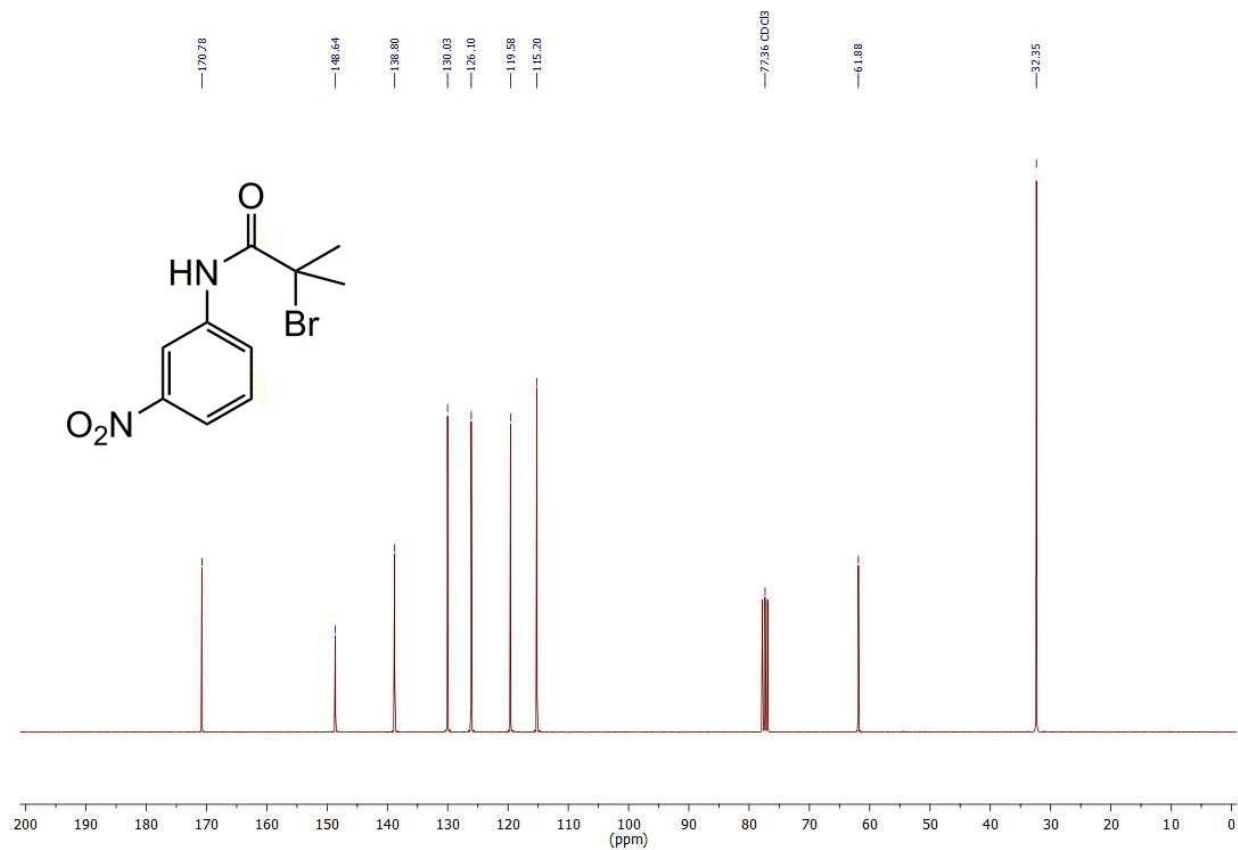

138 mg of **13** in 0.4 mL  $\text{CDCl}_3$ , 75 MHz, 14000 scans

ESI for:

Bromo–nitro substitution on a tertiary  $\alpha$  carbon—a previously uncharacterized facet of the Kornblum substitution

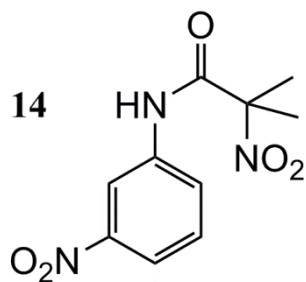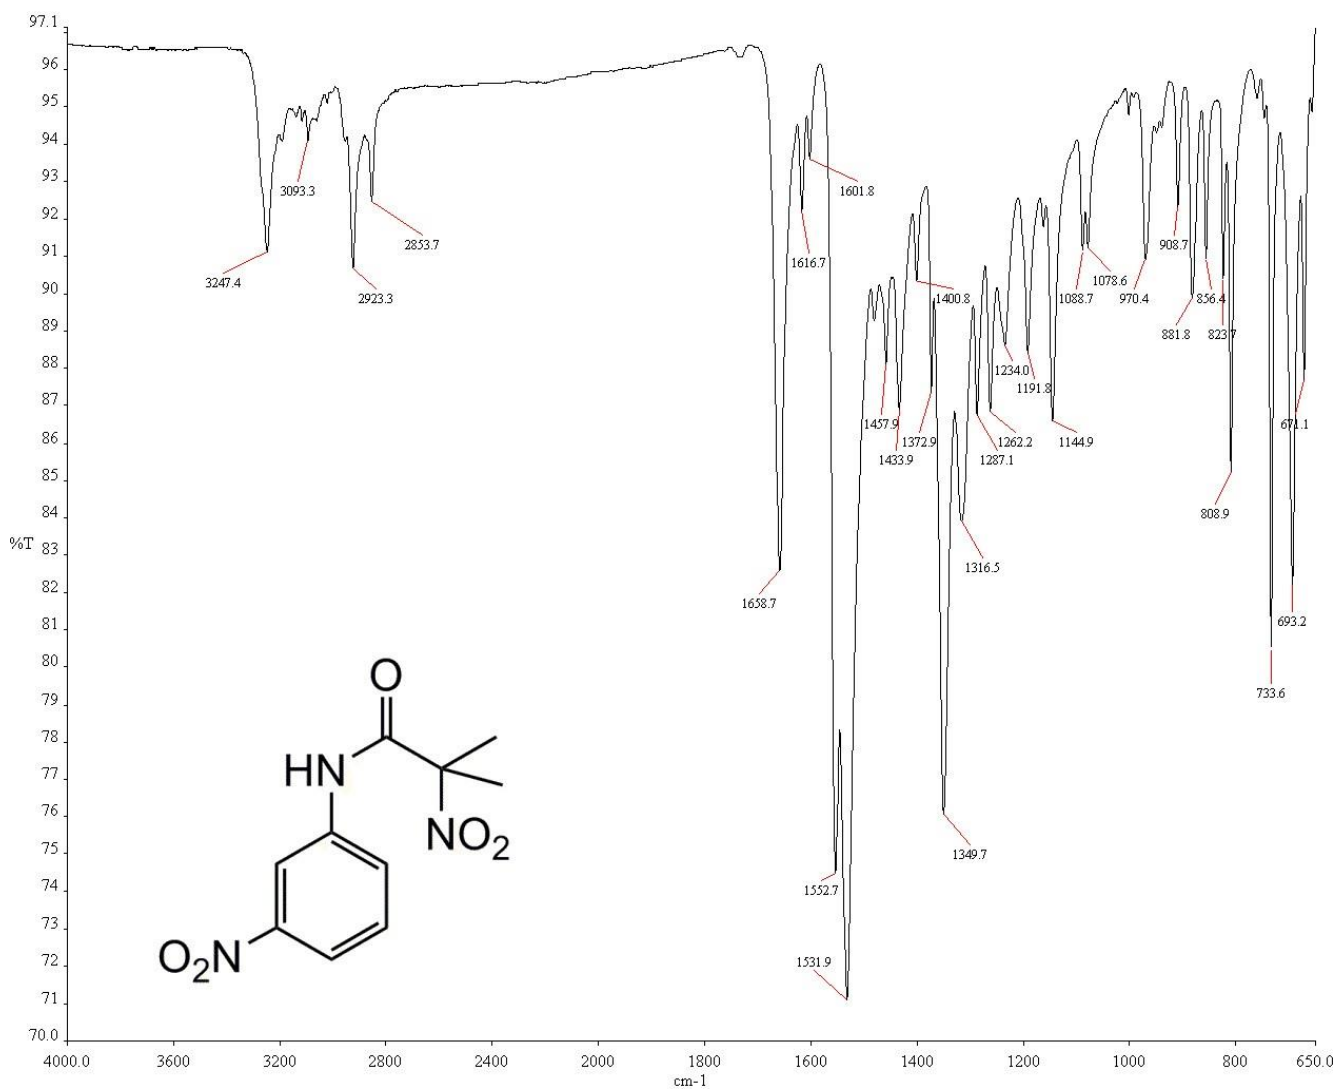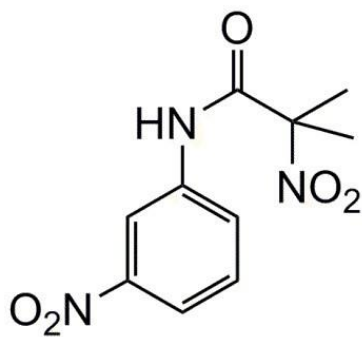

ESI for:

Bromo–nitro substitution on a tertiary  $\alpha$  carbon—a previously uncharacterized facet of the Kornblum substitution

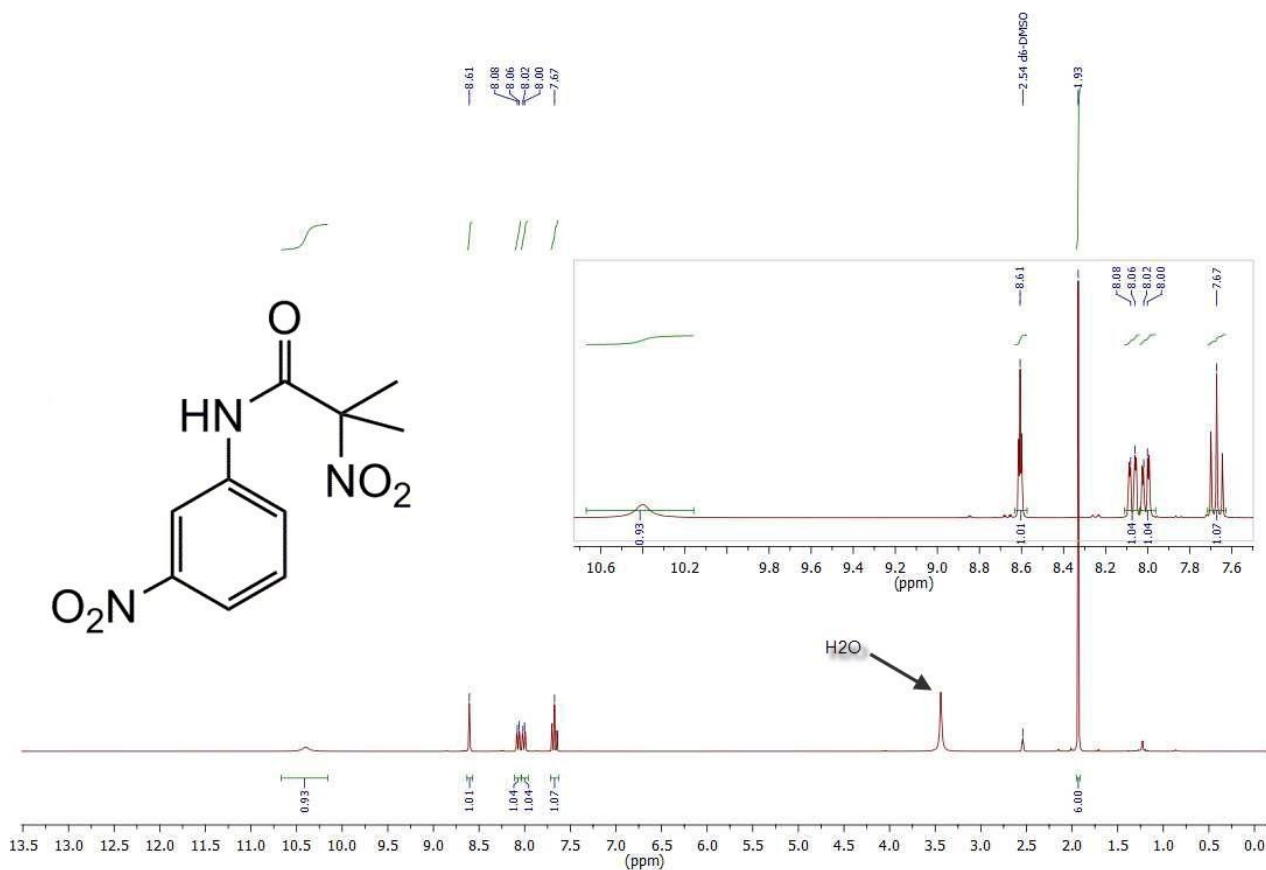

50 mg of **14** in 0.4 mL  $d_6$ -DMSO, 300 MHz, 16 scans

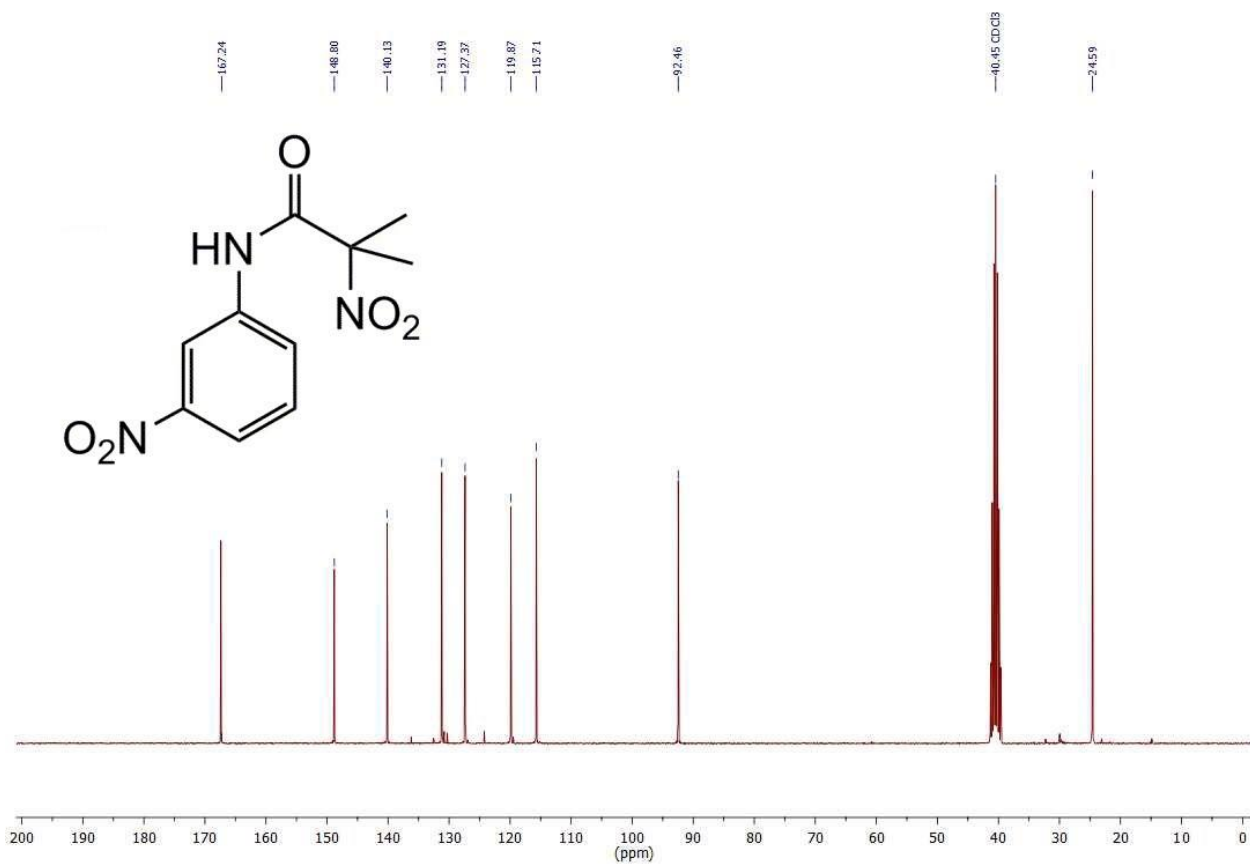

50 mg of **14** in 0.4 mL  $d_6$ -DMSO, 75 MHz, 14000 scans



ESI for:  
Bromo–nitro substitution on a tertiary  $\alpha$  carbon—a previously uncharacterized facet of the Kornblum substitution

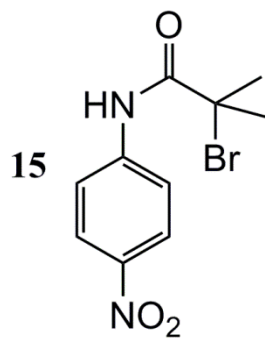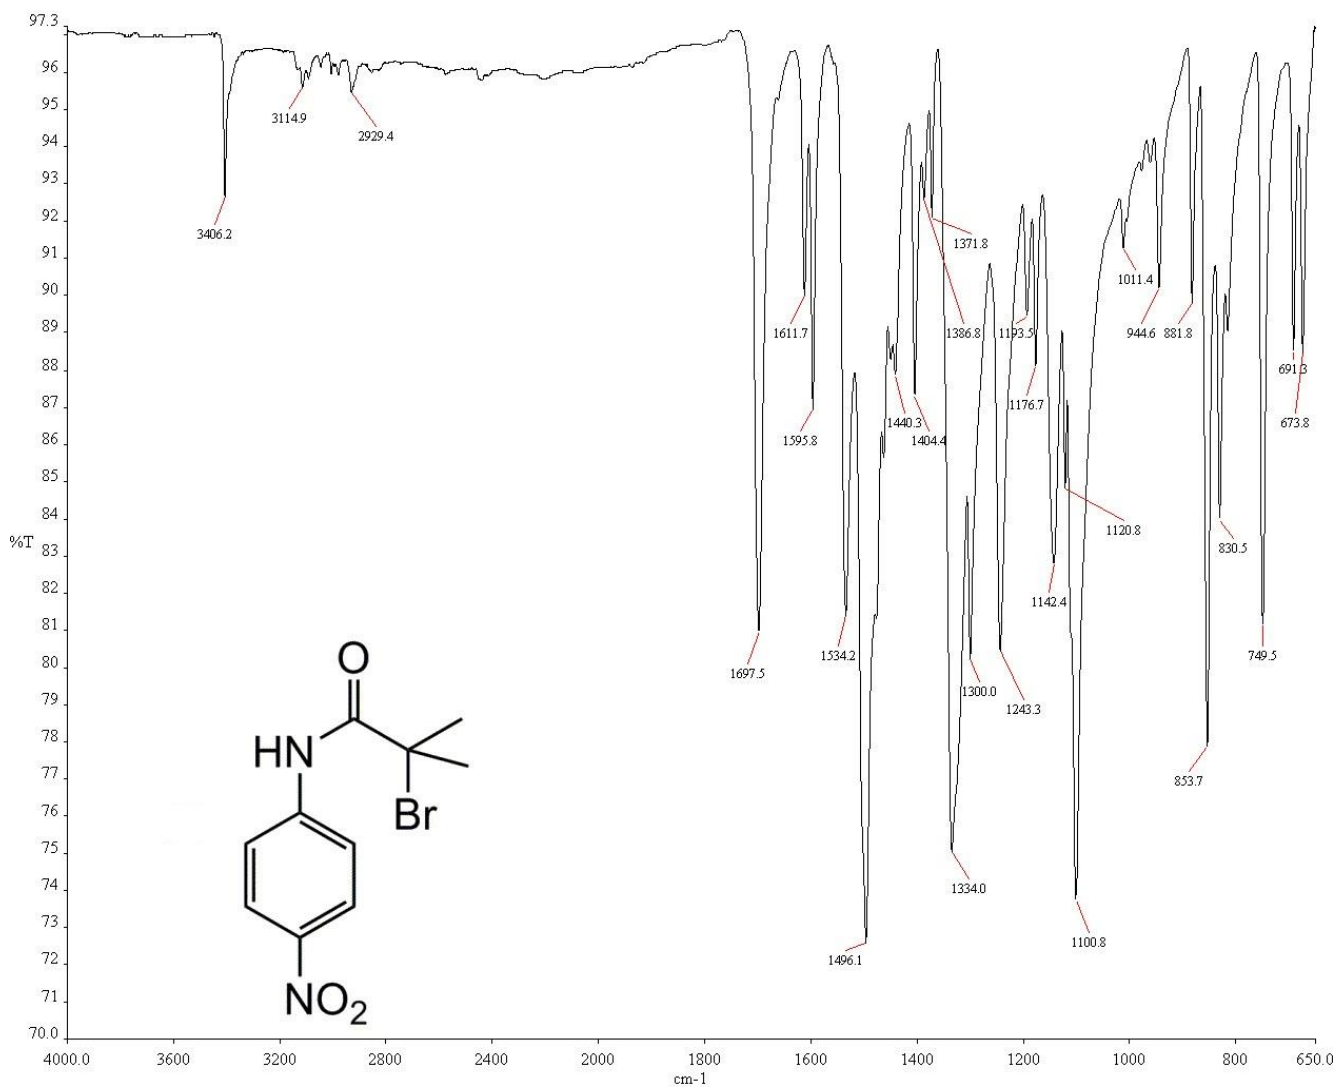

ESI for:

Bromo–nitro substitution on a tertiary  $\alpha$  carbon—a previously uncharacterized facet of the Kornblum substitution

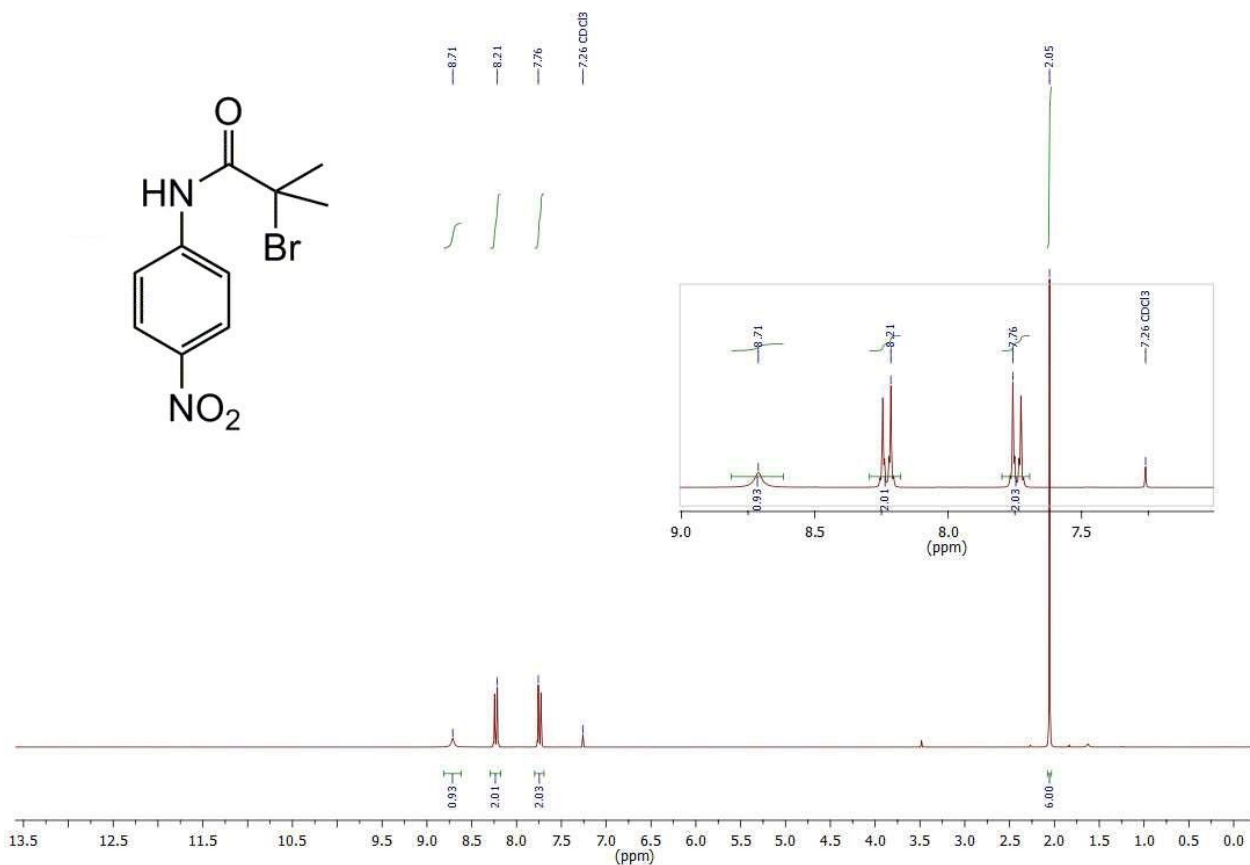

30 mg of **15** in 0.4 mL CDCl<sub>3</sub>, 300 MHz, 32 scans

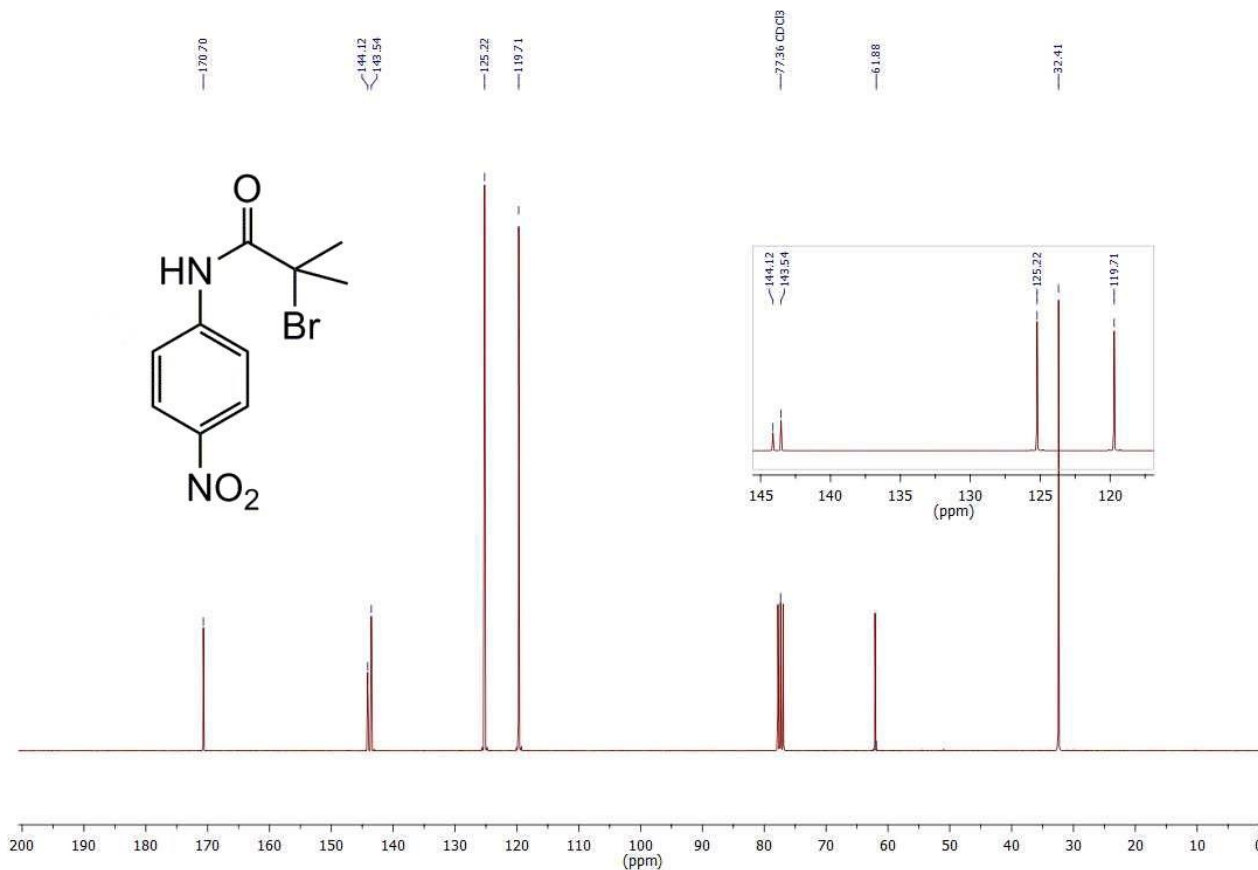

122 mg of **15** in 0.4 mL CDCl<sub>3</sub>, 75 MHz, 19456 scans

ESI for:

Bromo–nitro substitution on a tertiary  $\alpha$  carbon—a previously uncharacterized facet of the Kornblum substitution

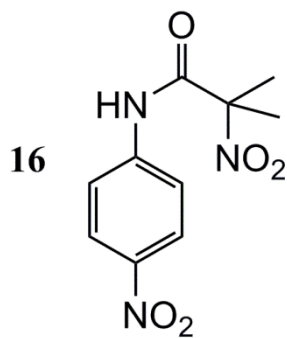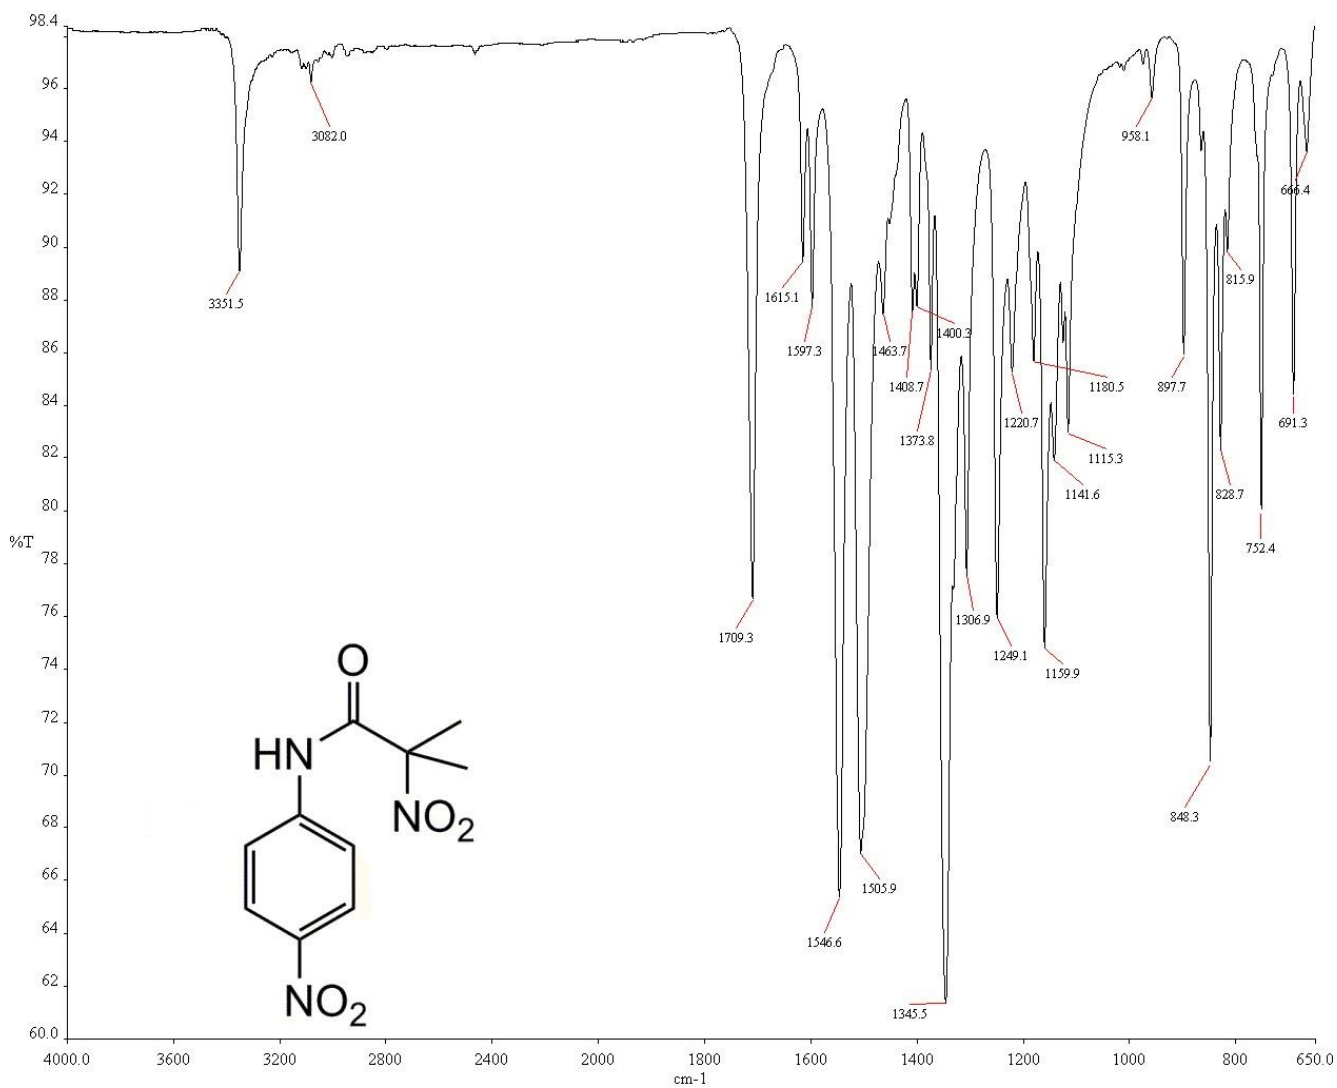

ESI for:

Bromo–nitro substitution on a tertiary  $\alpha$  carbon—a previously uncharacterized facet of the Kornblum substitution

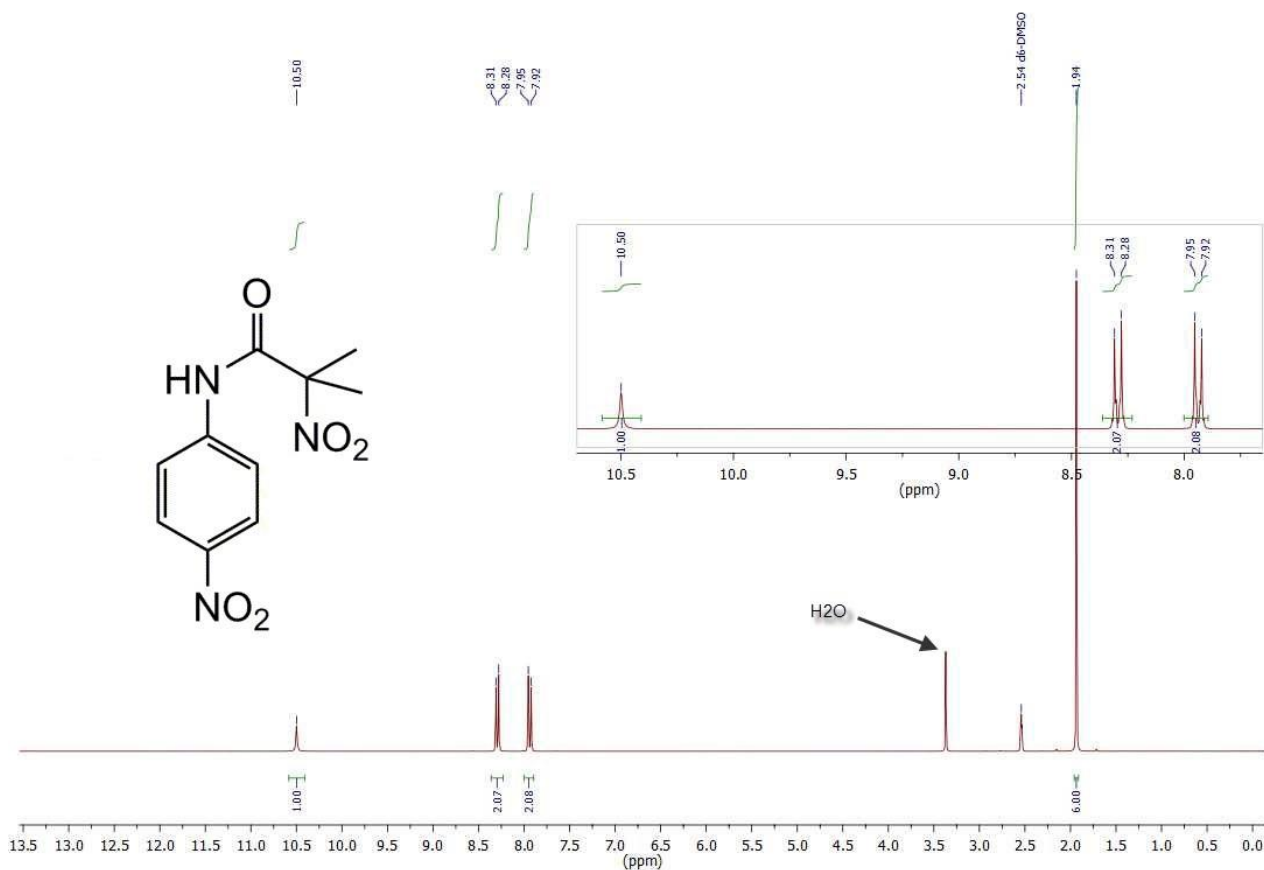

27 mg of **16** in 0.4 mL  $d_6$ -DMSO, 300 MHz, 32 scans

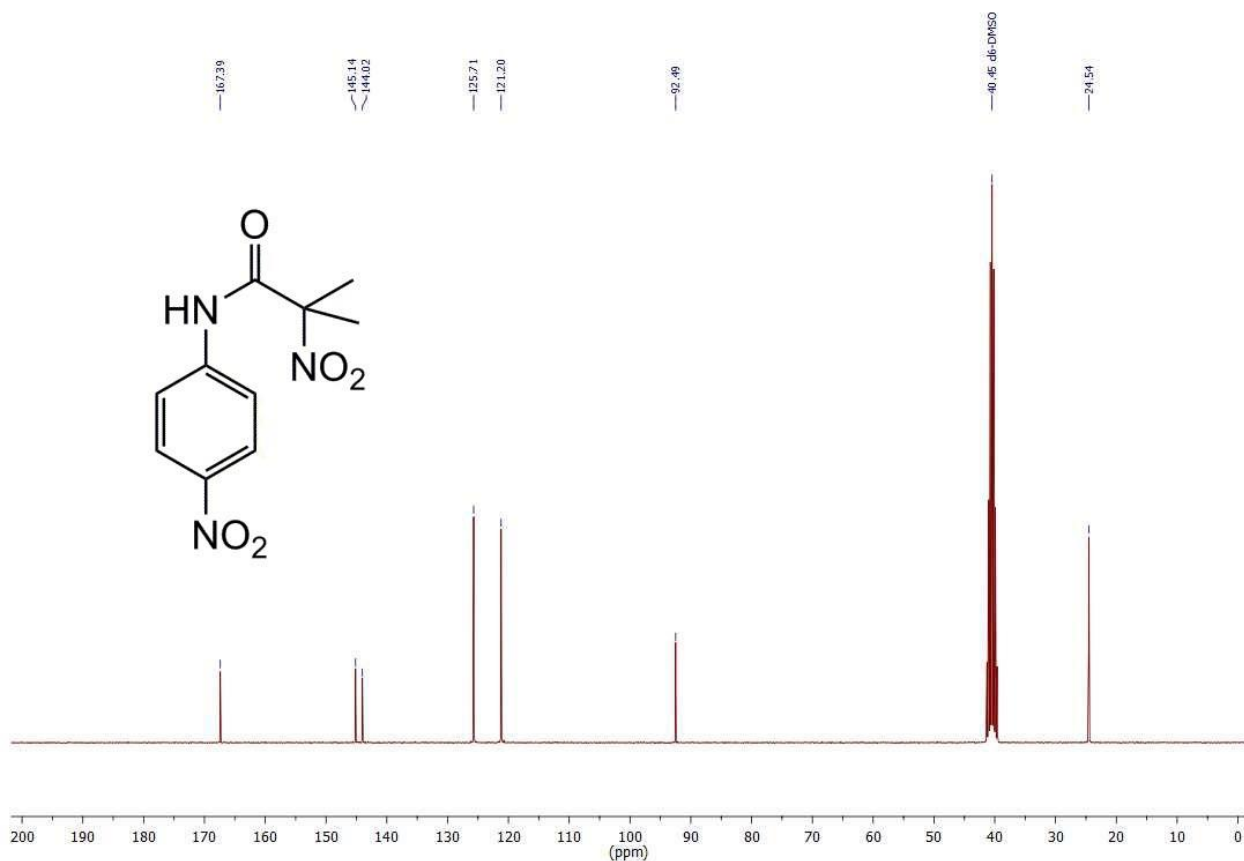

27 mg of **16** in 0.4 mL  $d_6$ -DMSO, 75 MHz, 14000 scans

ESI for:

Bromo–nitro substitution on a tertiary  $\alpha$  carbon—a previously uncharacterized facet of the Kornblum substitution

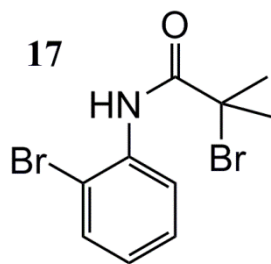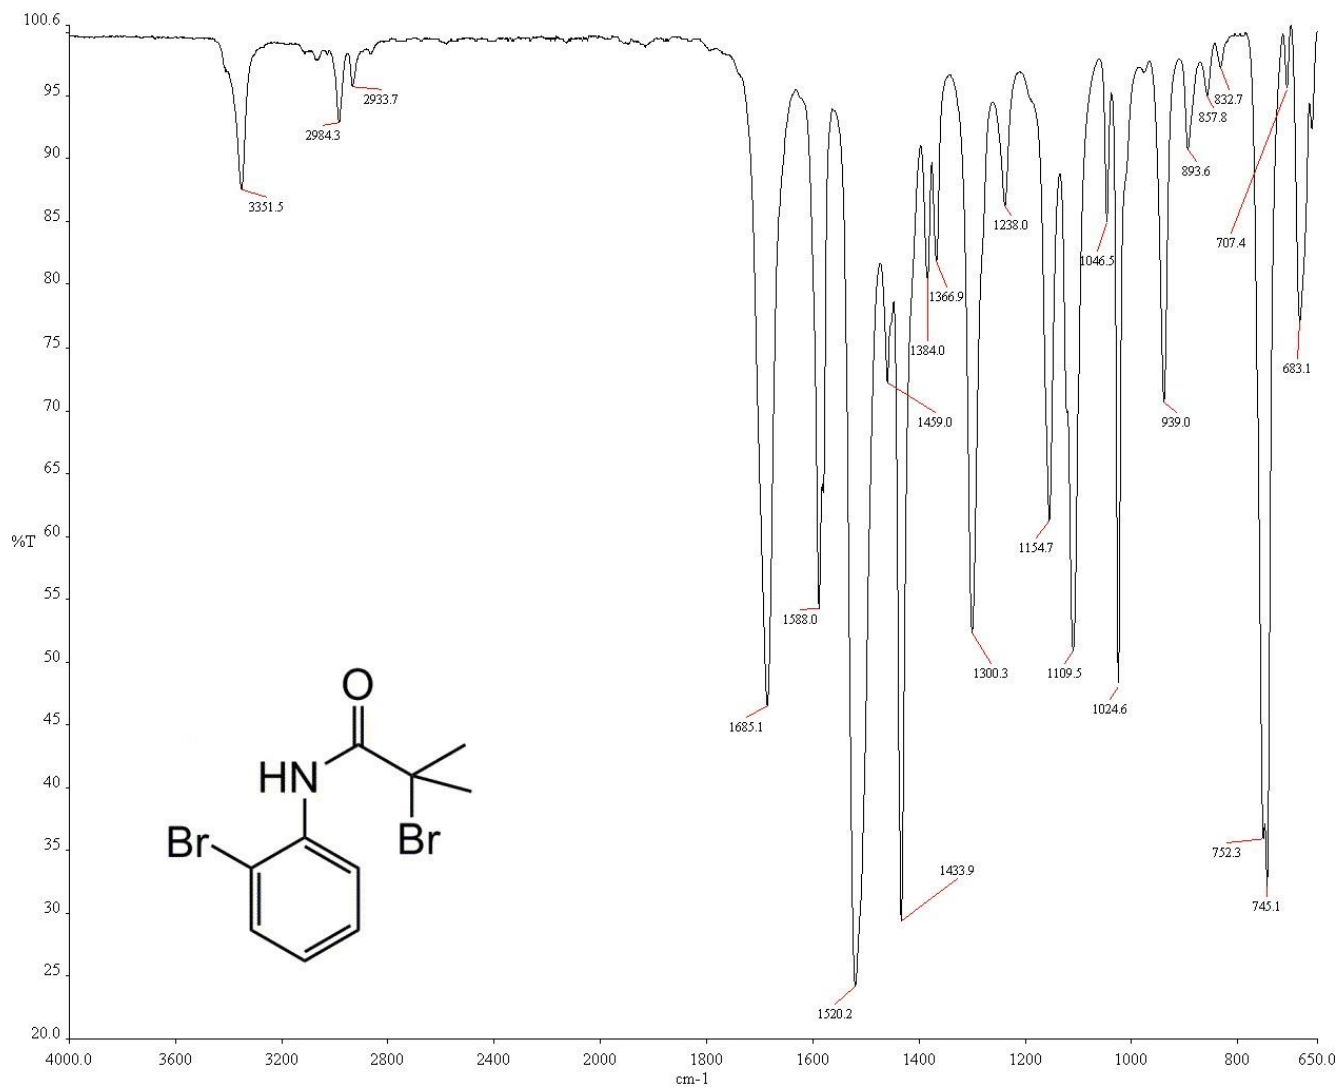

ESI for:

Bromo–nitro substitution on a tertiary  $\alpha$  carbon—a previously uncharacterized facet of the Kornblum substitution

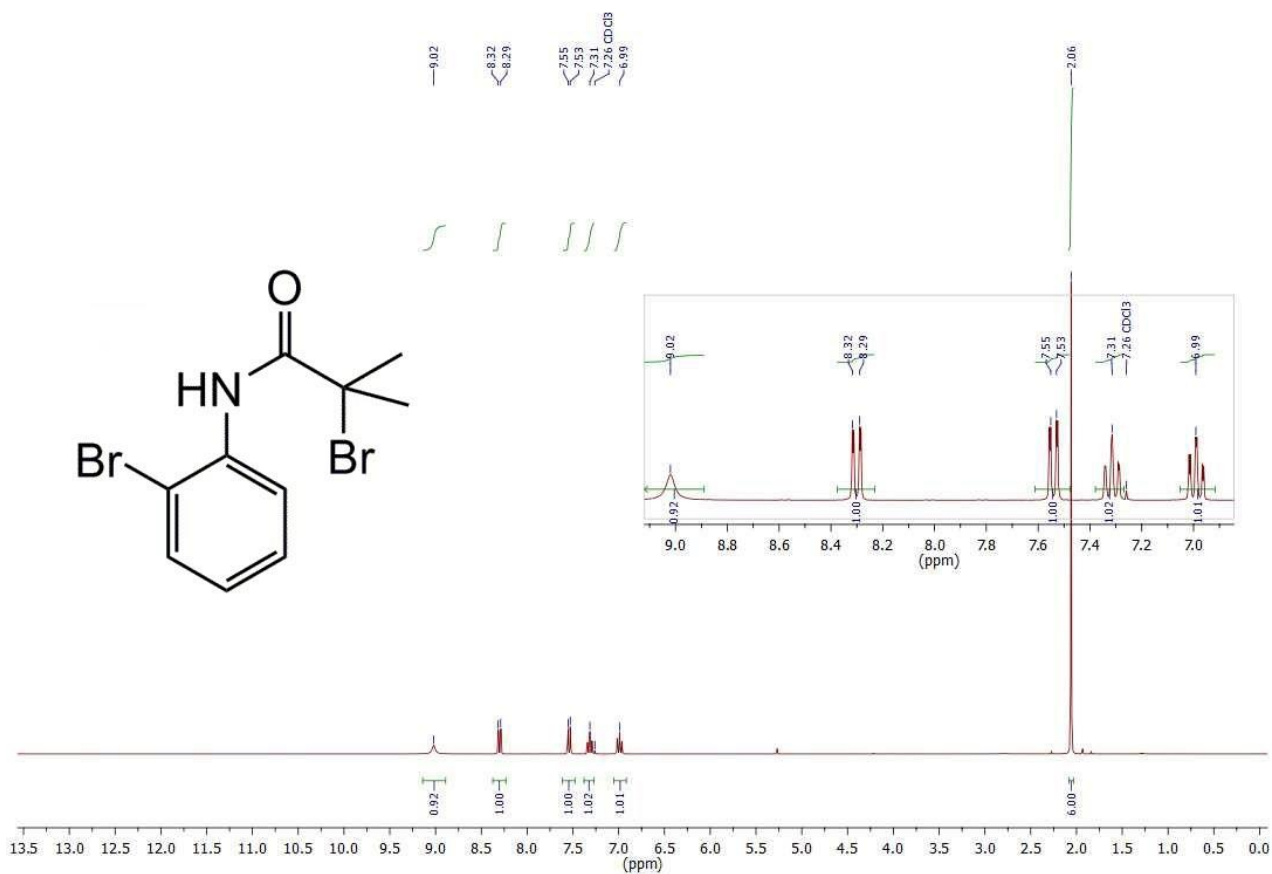

144 mg of **17** in 0.4 mL  $\text{CDCl}_3$ , 300 MHz, 8 scans

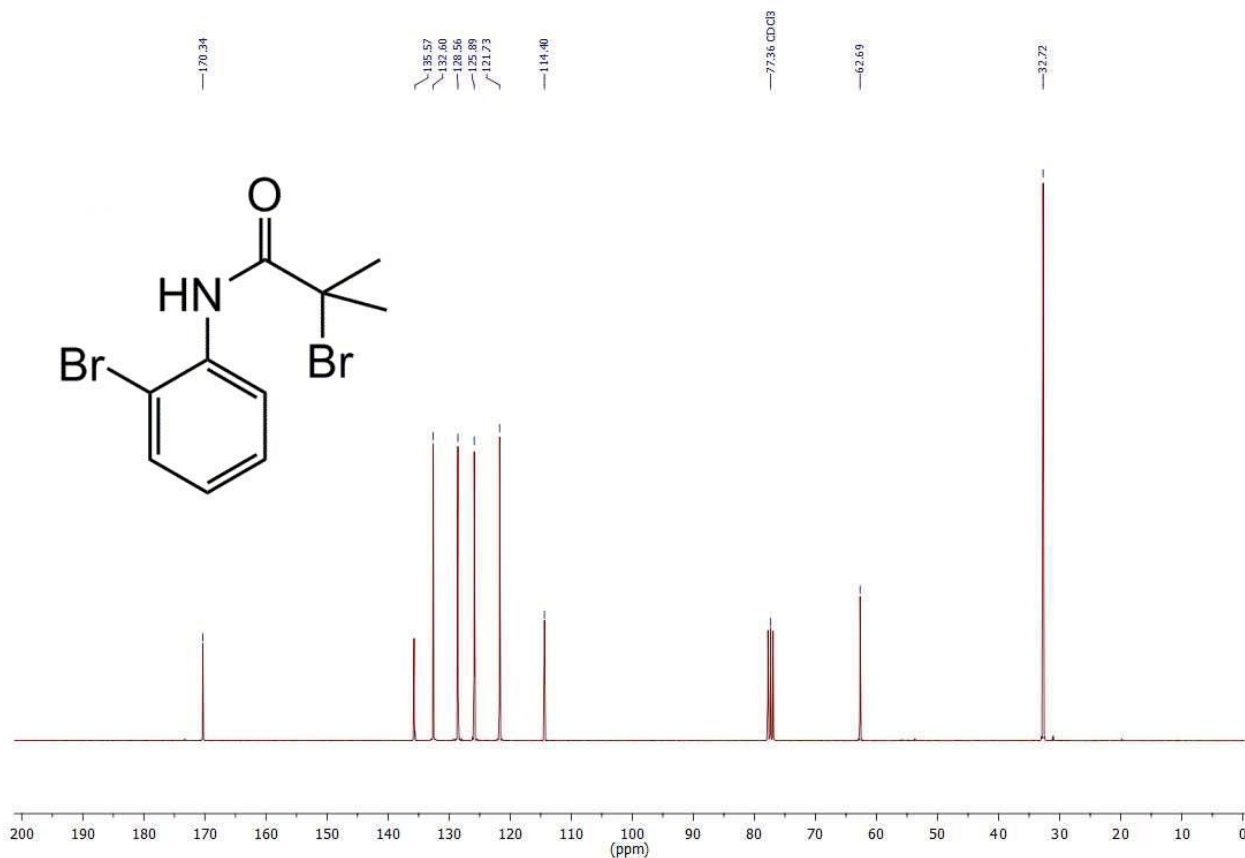

144 mg of **17** in 0.4 mL  $\text{CDCl}_3$ , 75 MHz, 14000 scans

ESI for:  
Bromo–nitro substitution on a tertiary  $\alpha$  carbon—a previously uncharacterized facet of the Kornblum substitution

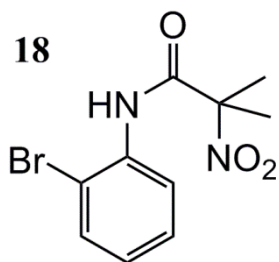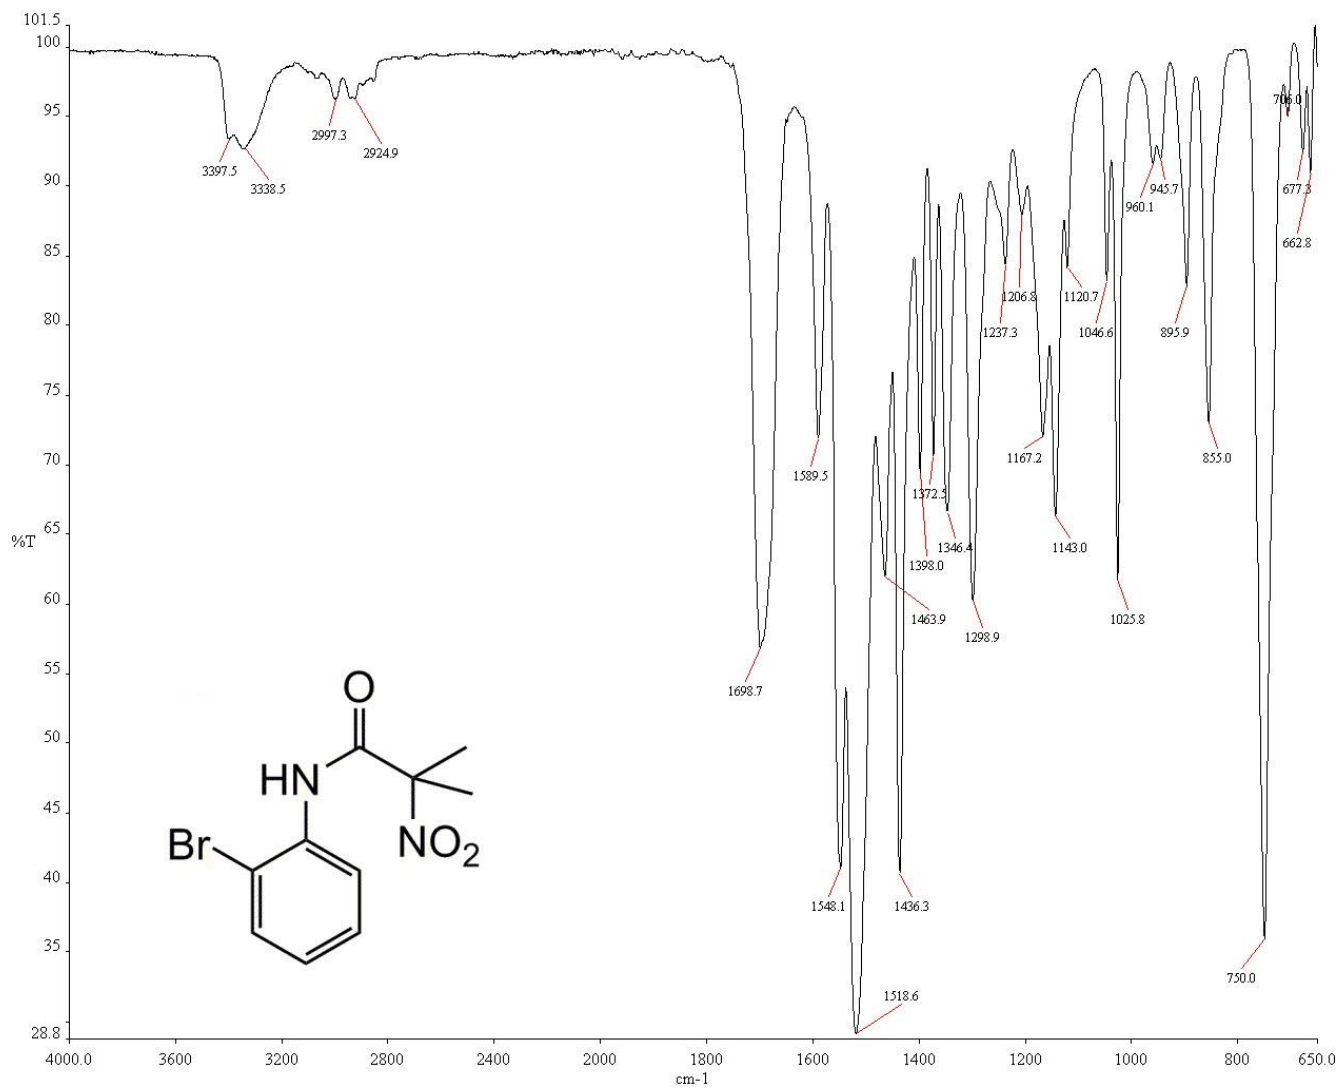

ESI for:

Bromo–nitro substitution on a tertiary  $\alpha$  carbon—a previously uncharacterized facet of the Kornblum substitution

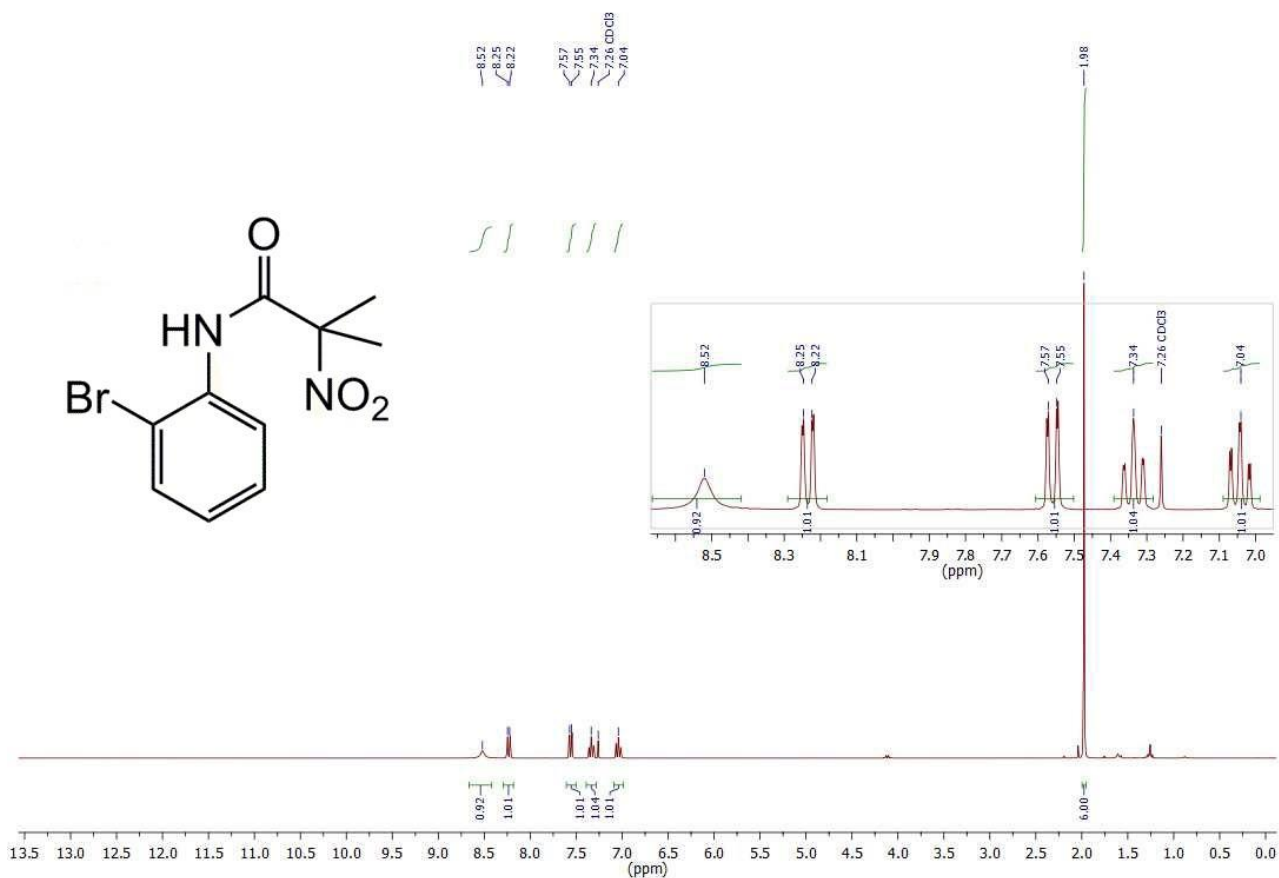

26 mg of **18** in 0.4 mL  $\text{CDCl}_3$ , 300 MHz, 16 scans

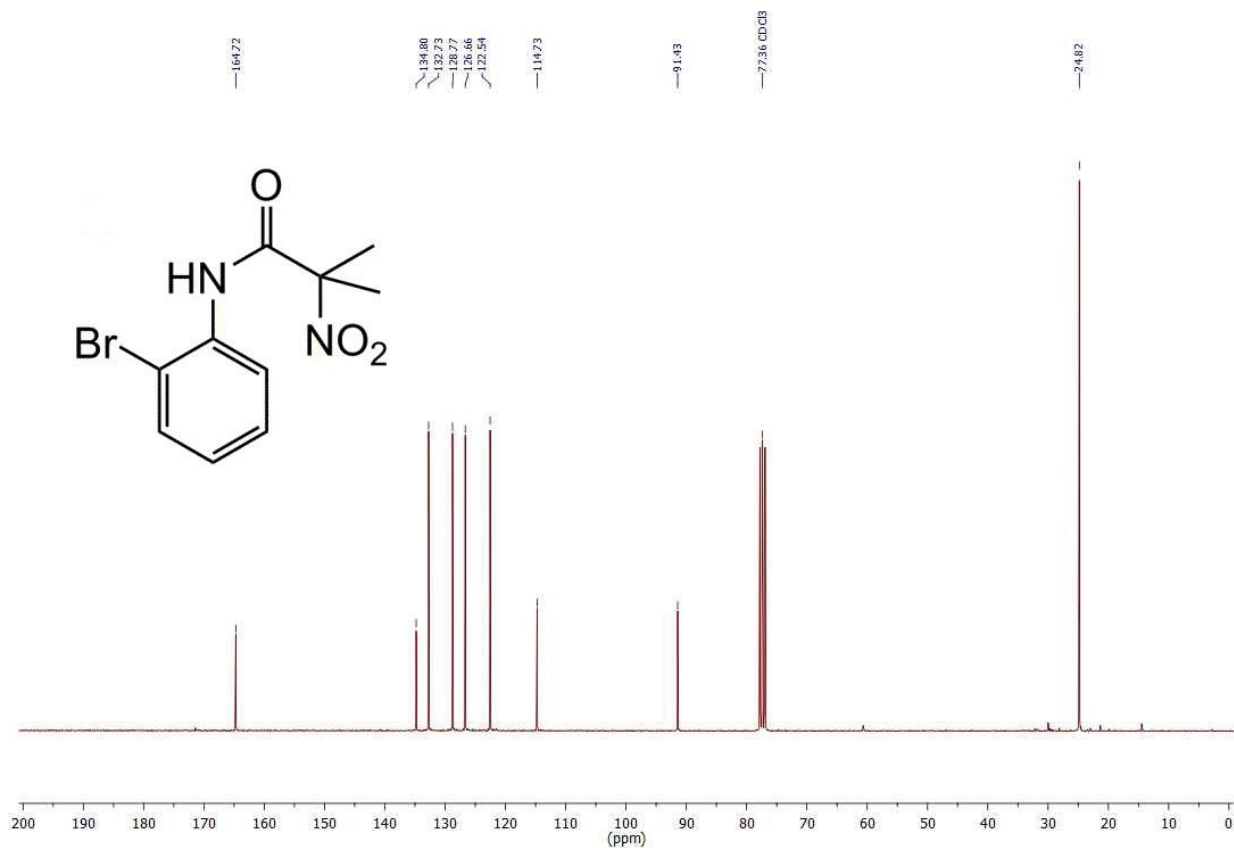

66 mg of **18** in 0.4 mL  $\text{CDCl}_3$ , 75 MHz, 14000 scans



ESI for:  
Bromo–nitro substitution on a tertiary  $\alpha$  carbon—a previously uncharacterized facet of the Kornblum substitution

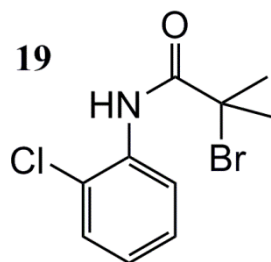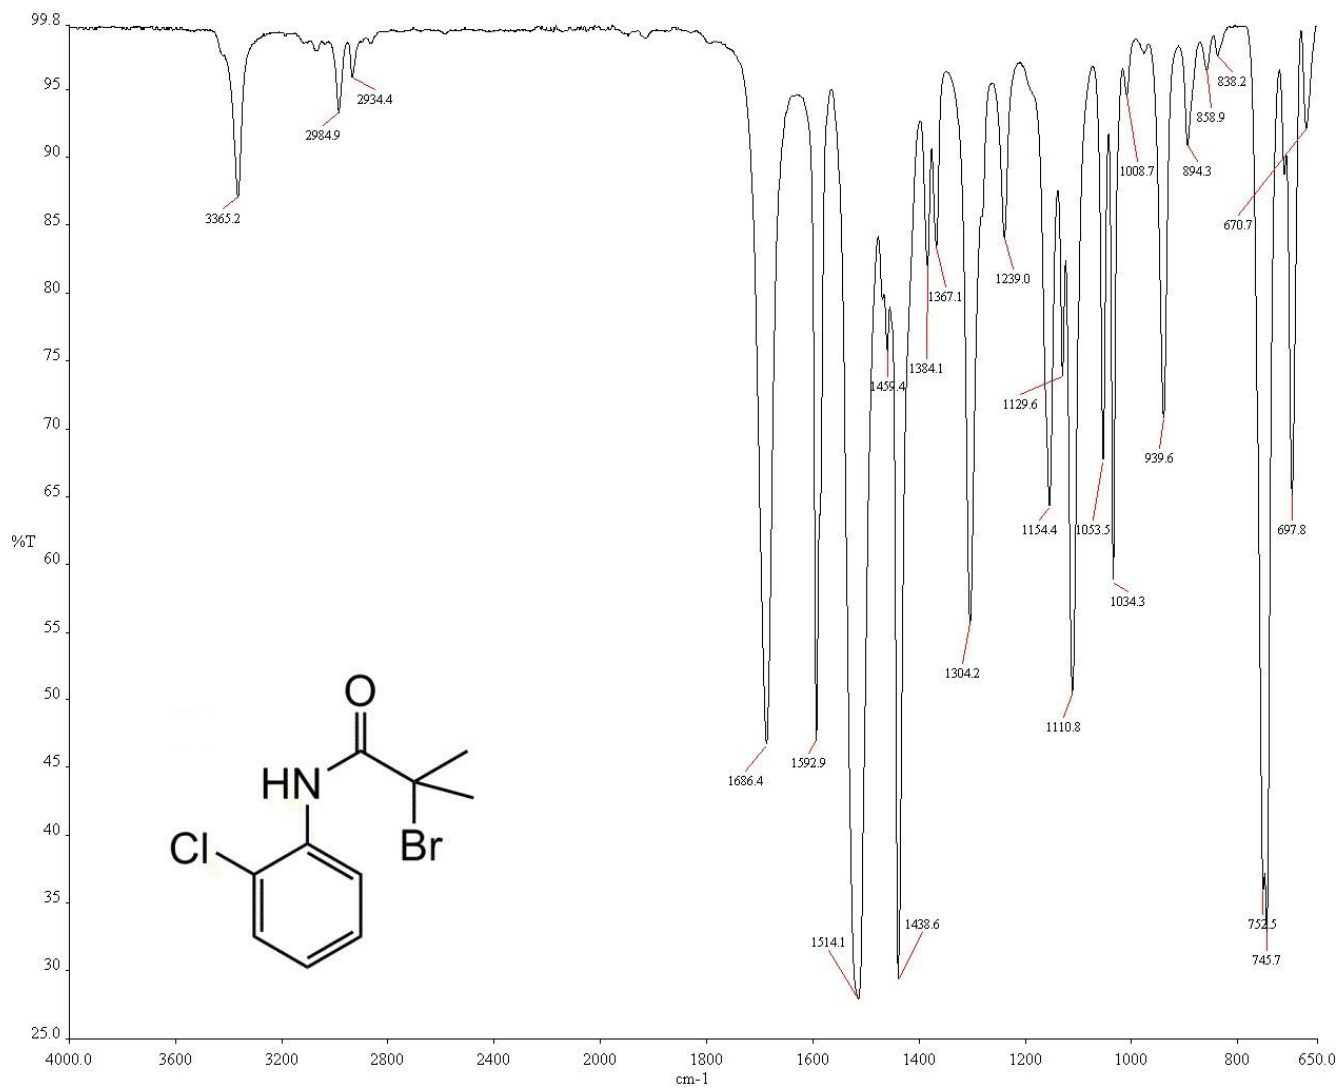

ESI for:

Bromo–nitro substitution on a tertiary  $\alpha$  carbon—a previously uncharacterized facet of the Kornblum substitution

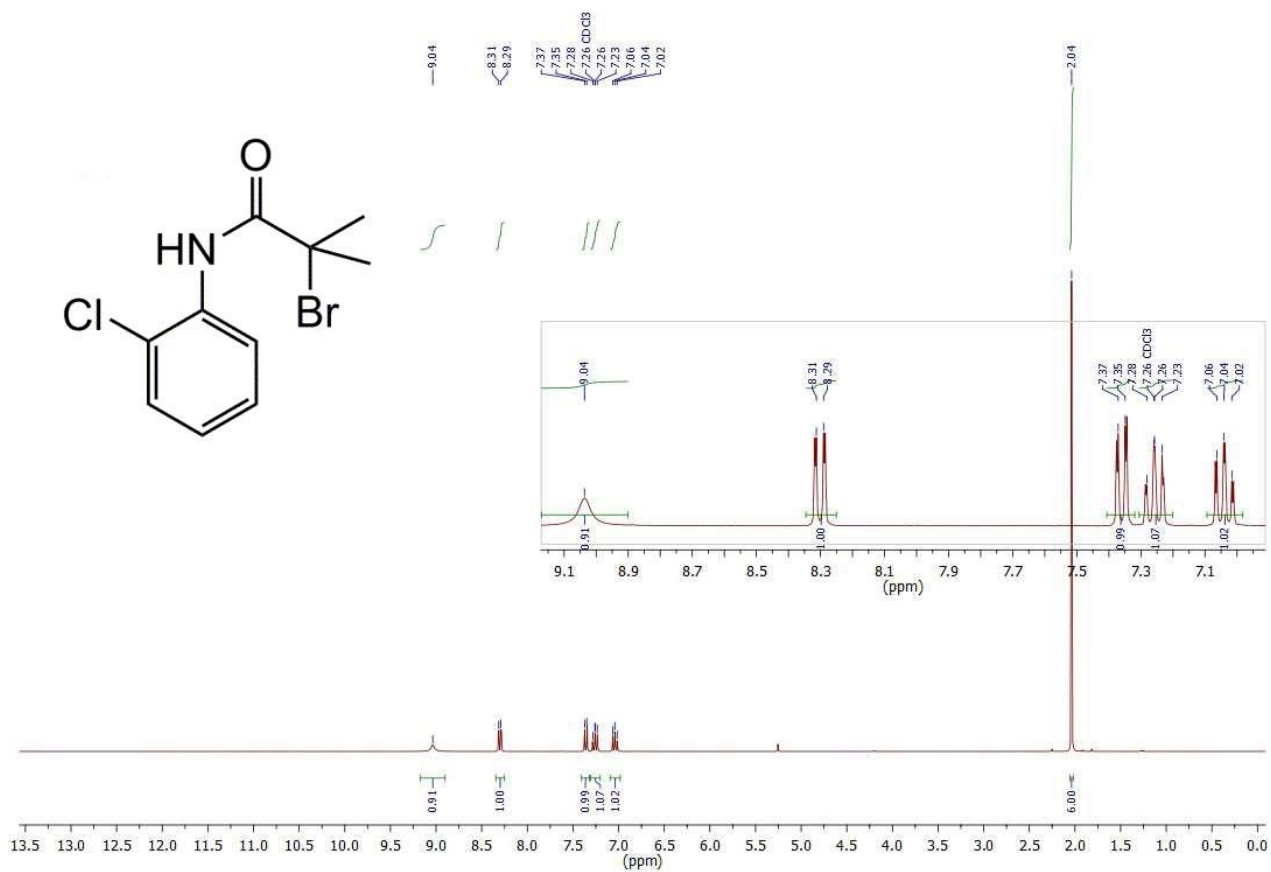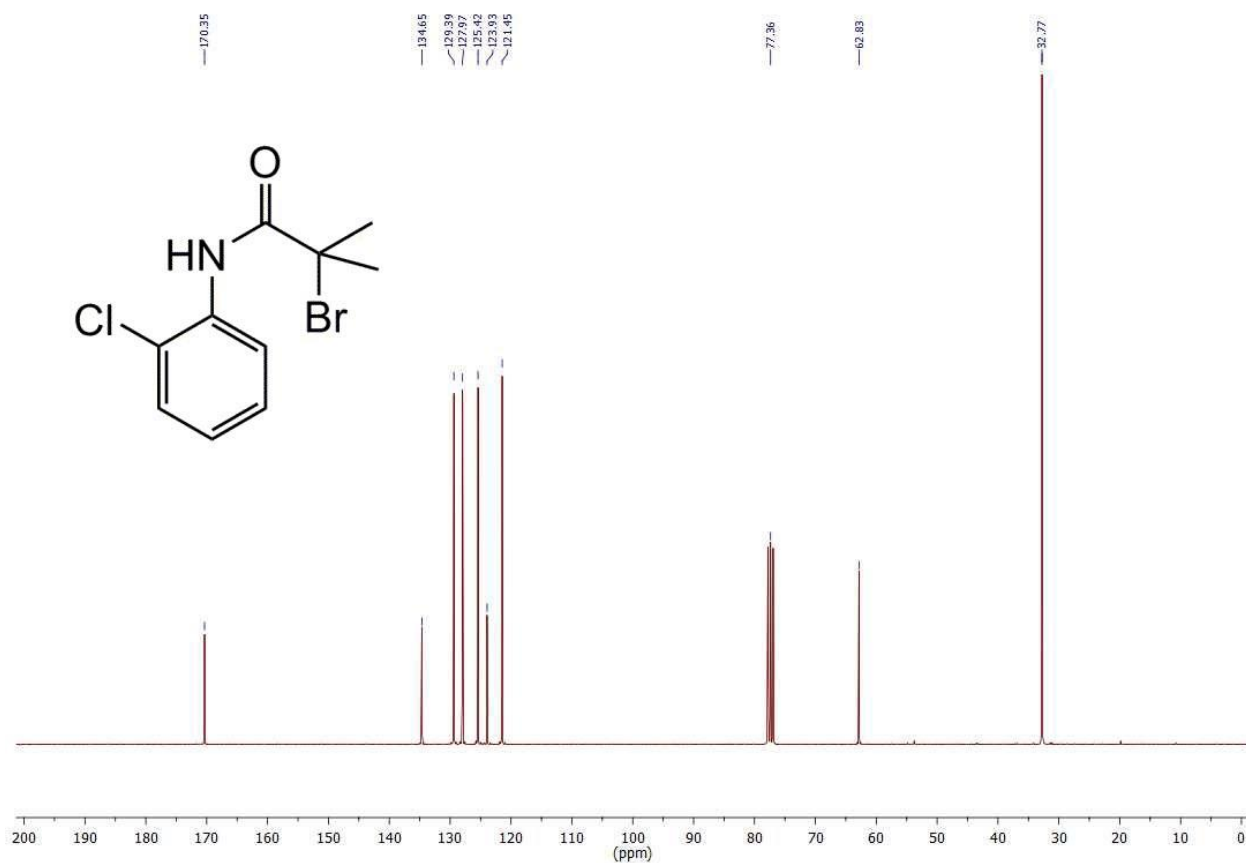

ESI for:  
Bromo–nitro substitution on a tertiary  $\alpha$  carbon—a previously uncharacterized facet of the Kornblum substitution

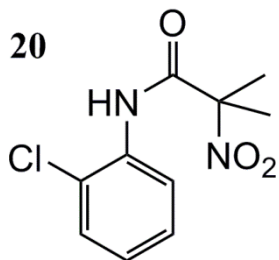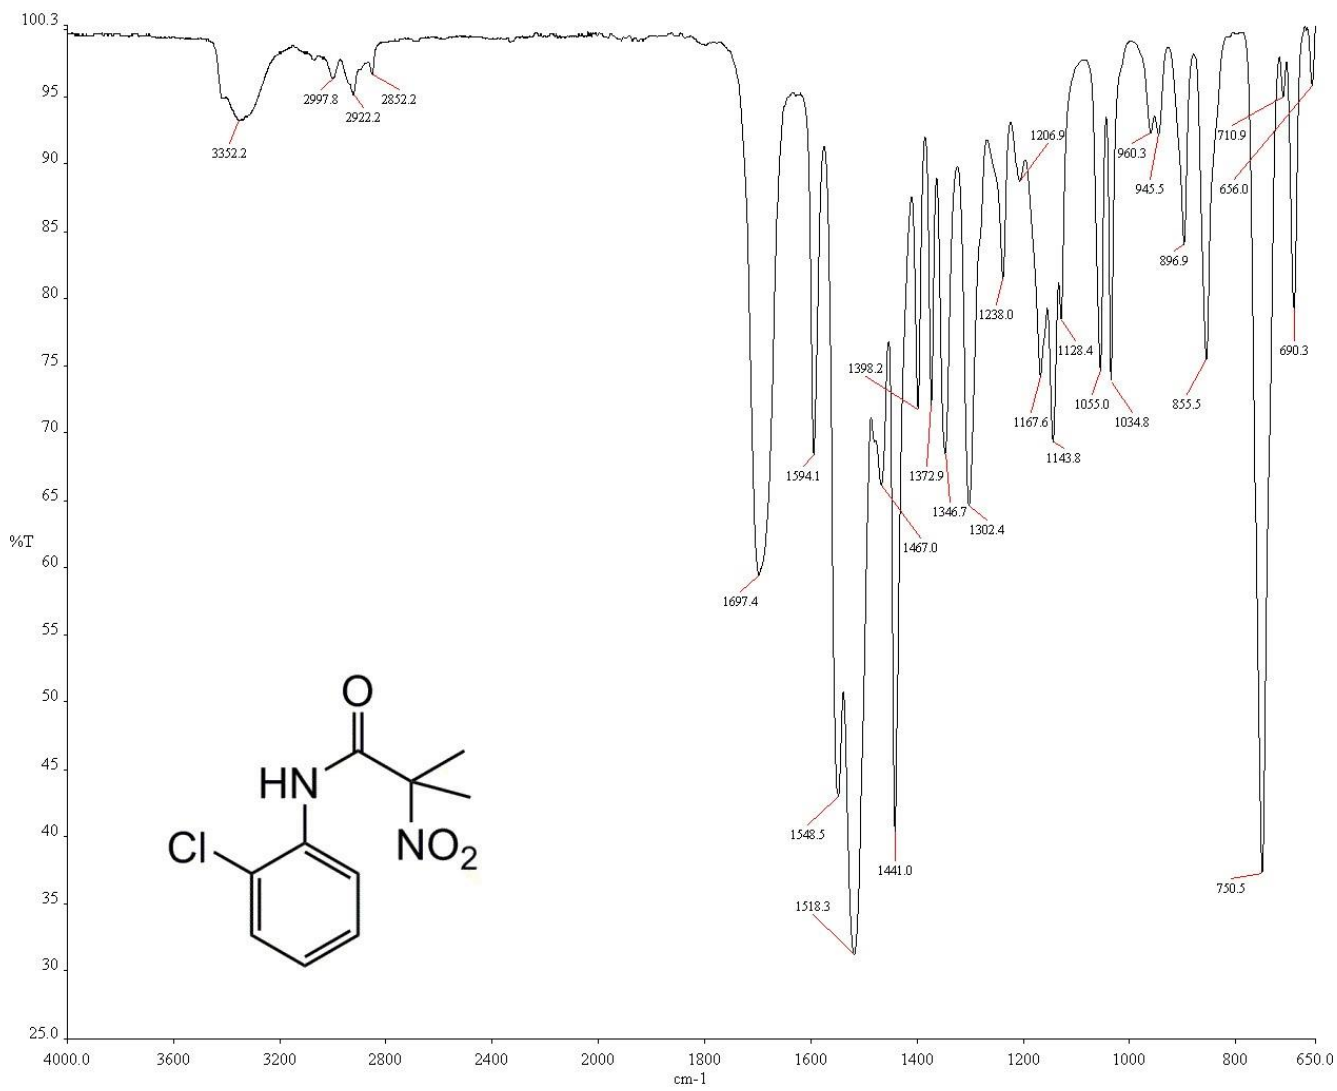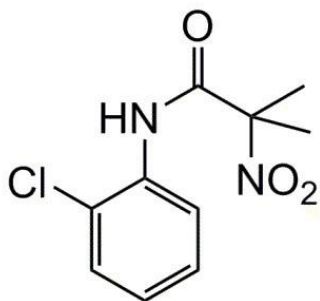

ESI for:

Bromo–nitro substitution on a tertiary  $\alpha$  carbon—a previously uncharacterized facet of the Kornblum substitution

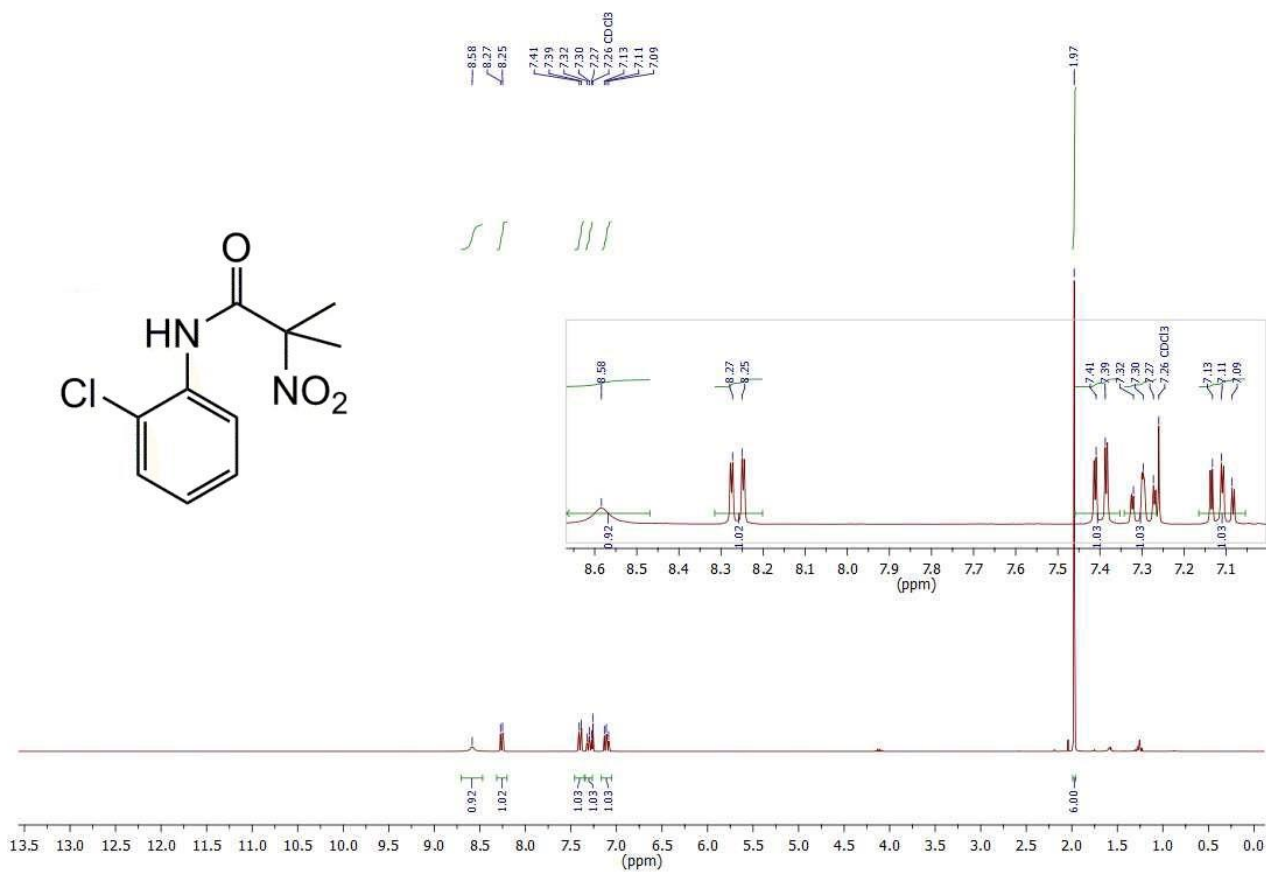

21 mg of **20** in 0.4 mL CDCl<sub>3</sub>, 300 MHz, 16 scans

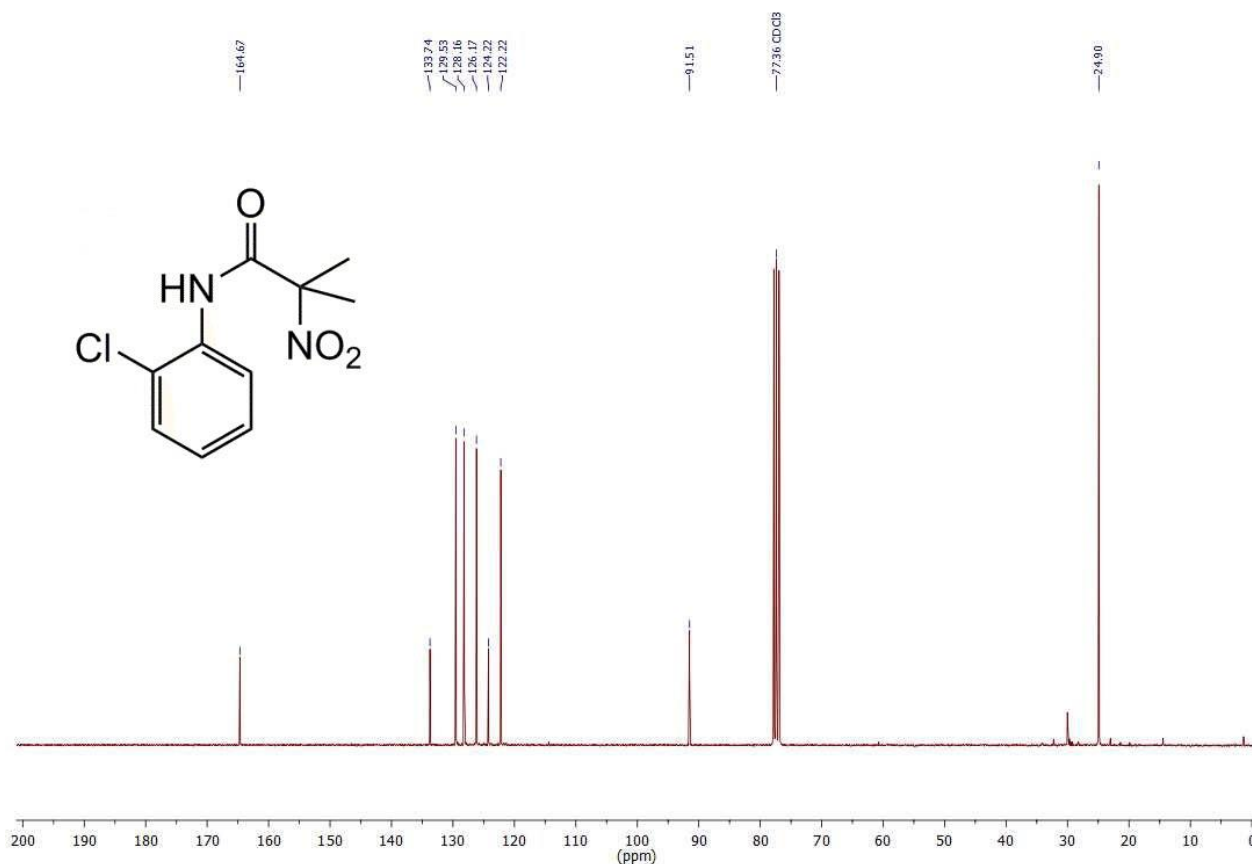

39 mg of **20** in 0.4 mL CDCl<sub>3</sub>, 75 MHz, 13000 scans

ESI for:

Bromo–nitro substitution on a tertiary  $\alpha$  carbon—a previously uncharacterized facet of the Kornblum substitution

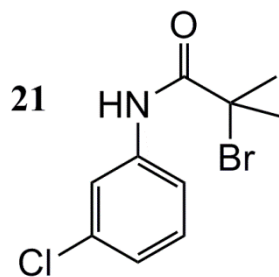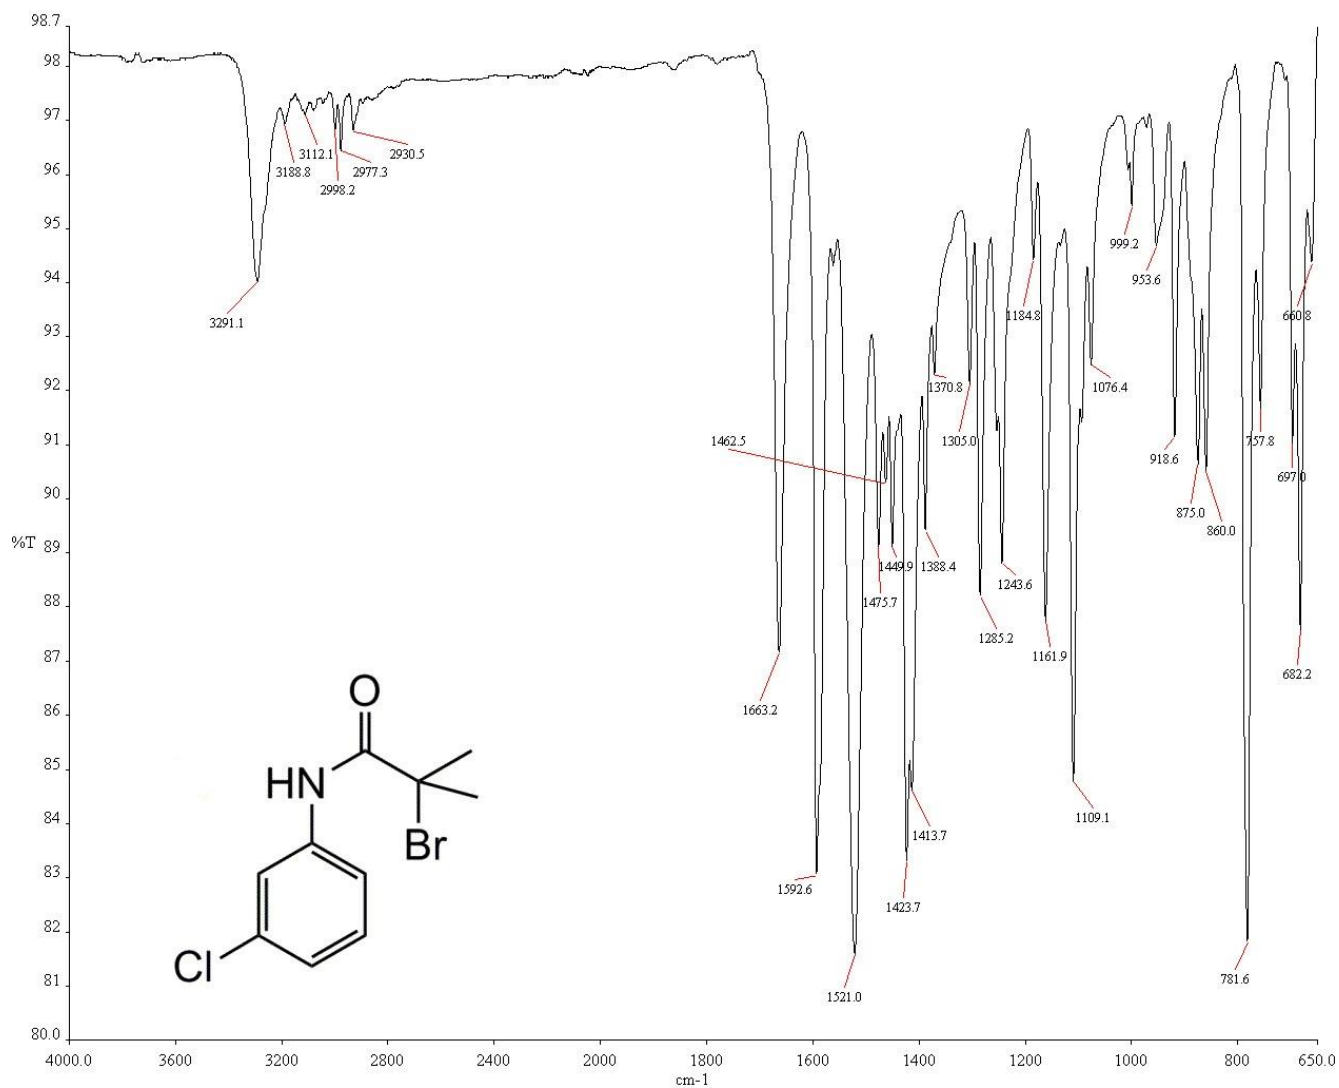

ESI for:

Bromo–nitro substitution on a tertiary  $\alpha$  carbon—a previously uncharacterized facet of the Kornblum substitution

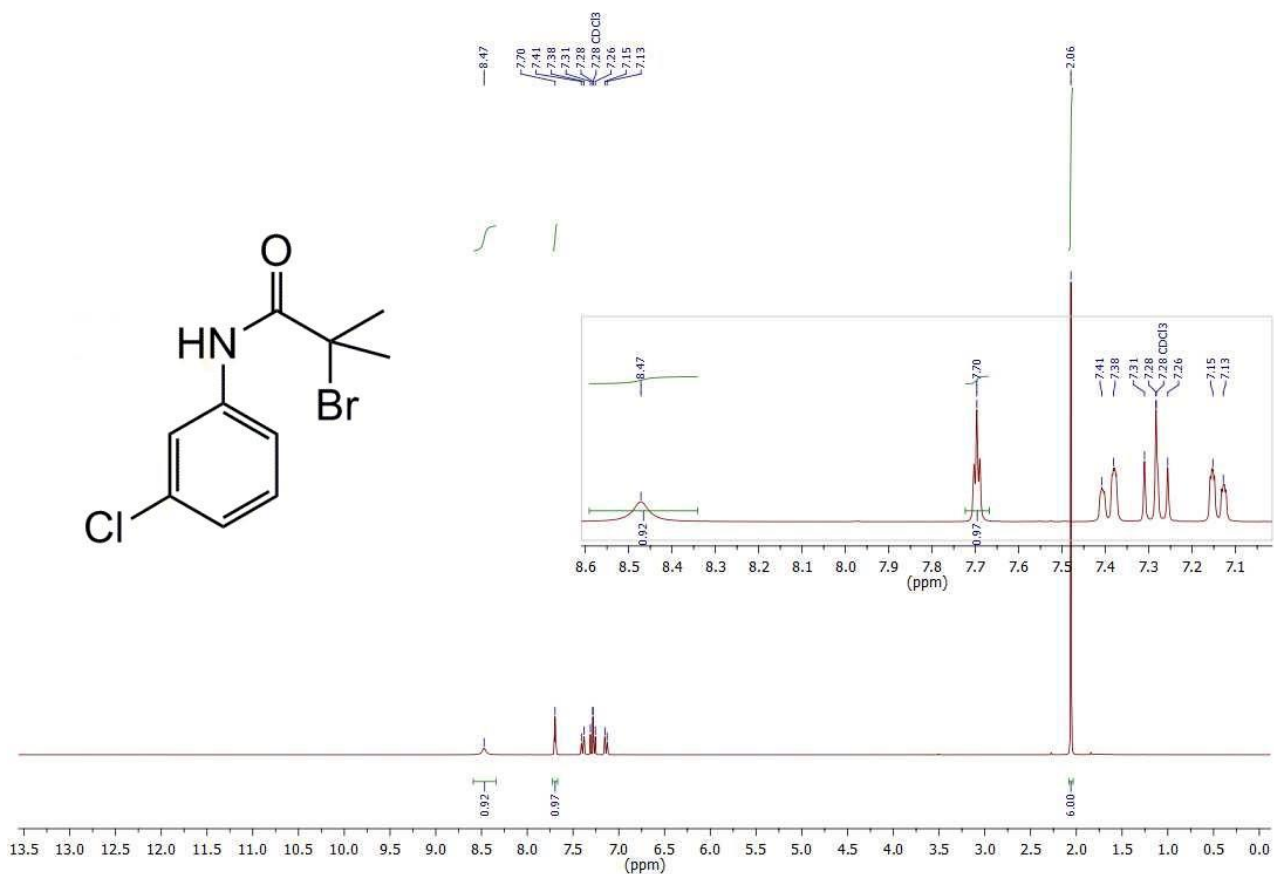

31 mg of **21** in 0.4 mL  $\text{CDCl}_3$ , 300 MHz, 16 scans

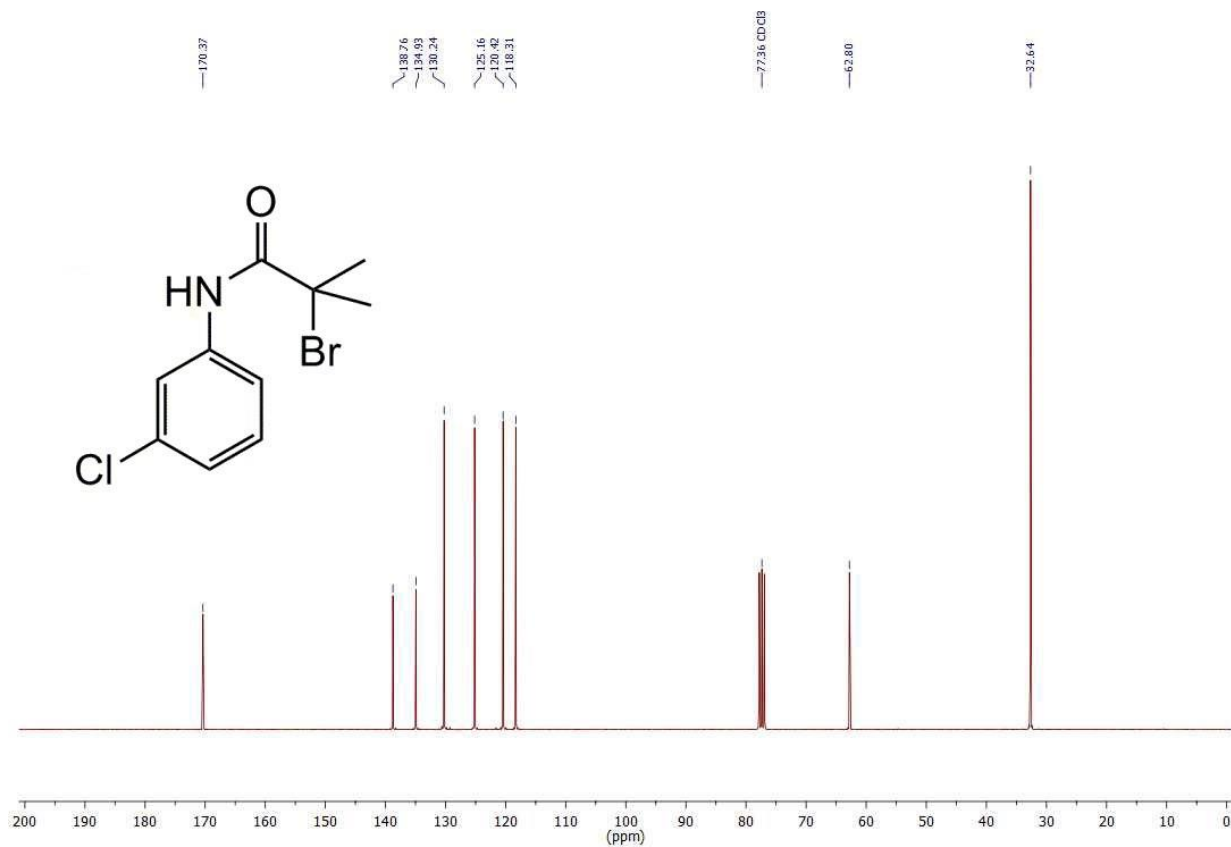

136 mg of **21** in 0.4 mL  $\text{CDCl}_3$ , 75 MHz, 15000 scans

ESI for:

Bromo–nitro substitution on a tertiary  $\alpha$  carbon—a previously uncharacterized facet of the Kornblum substitution

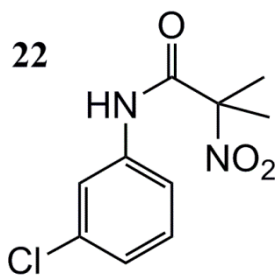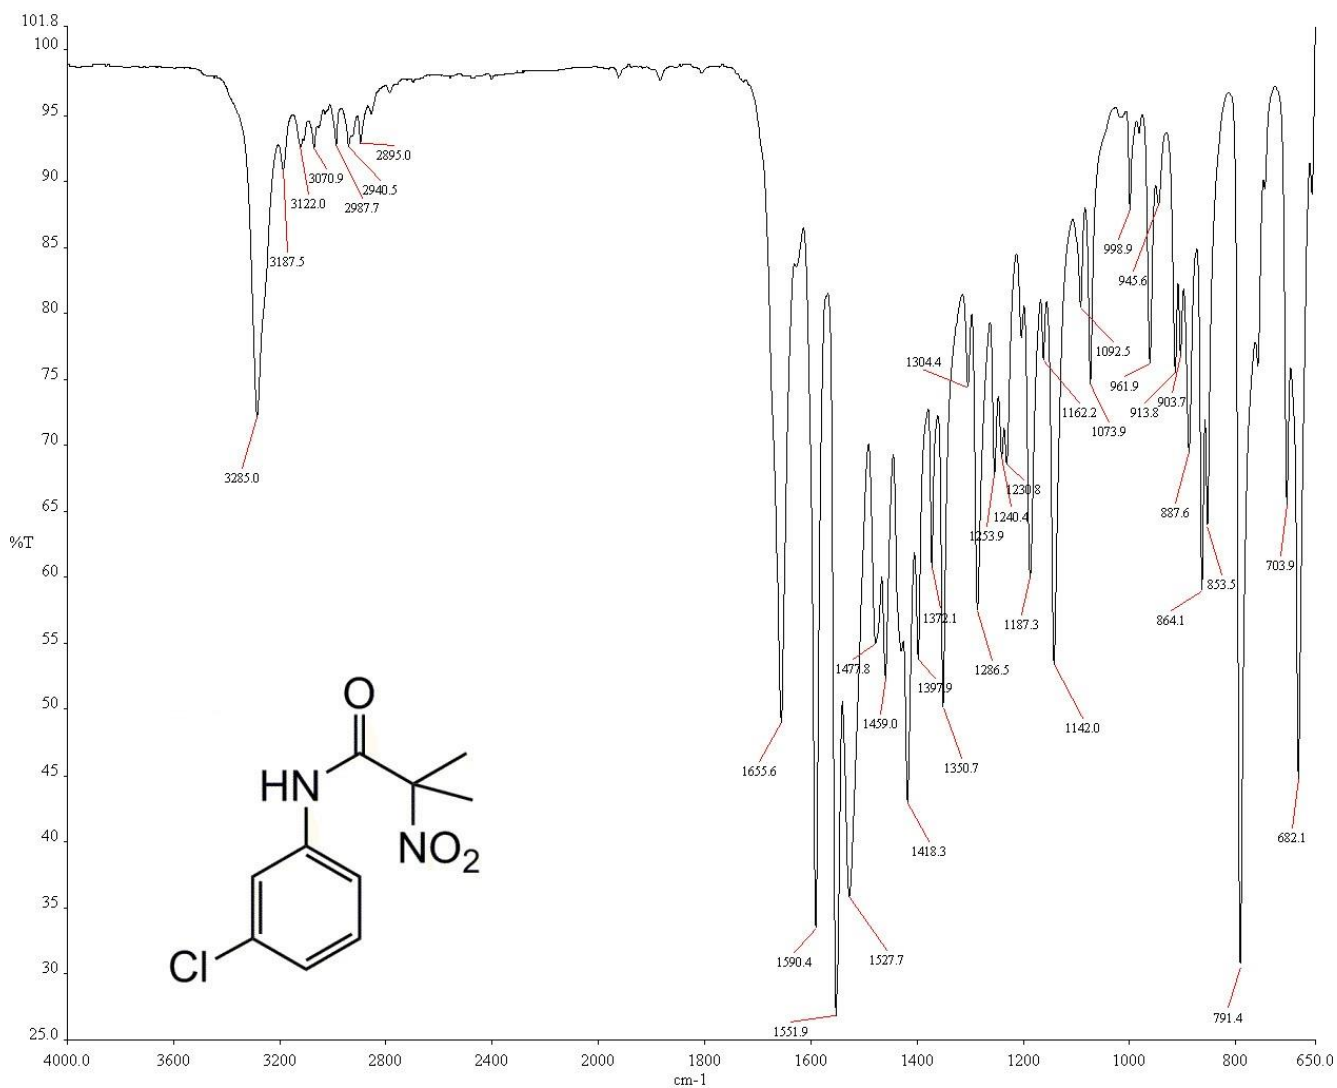

ESI for:

Bromo–nitro substitution on a tertiary  $\alpha$  carbon—a previously uncharacterized facet of the Kornblum substitution

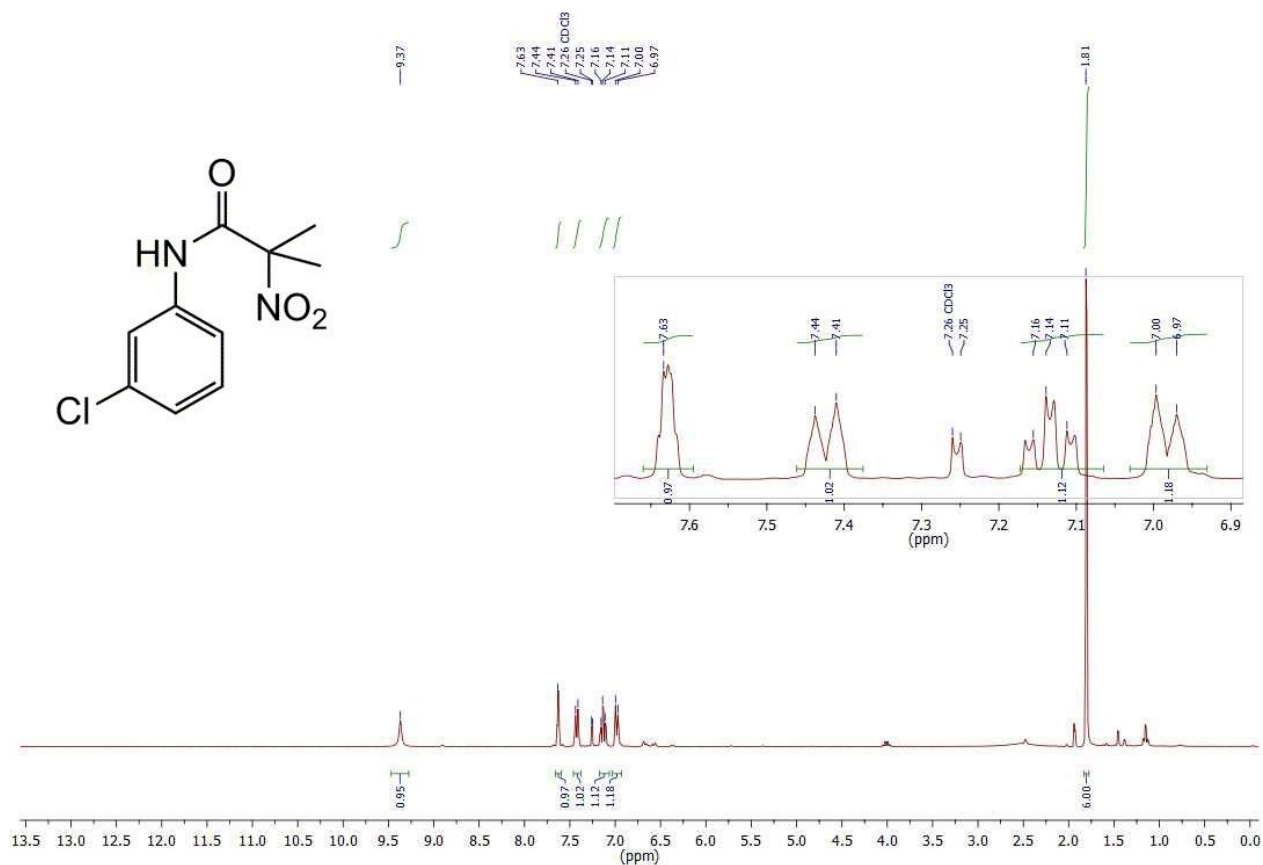

18 mg of **22** in 0.4 mL  $\text{CDCl}_3/2$  drops  $d_6$ -DMSO, 300 MHz, 16 scans

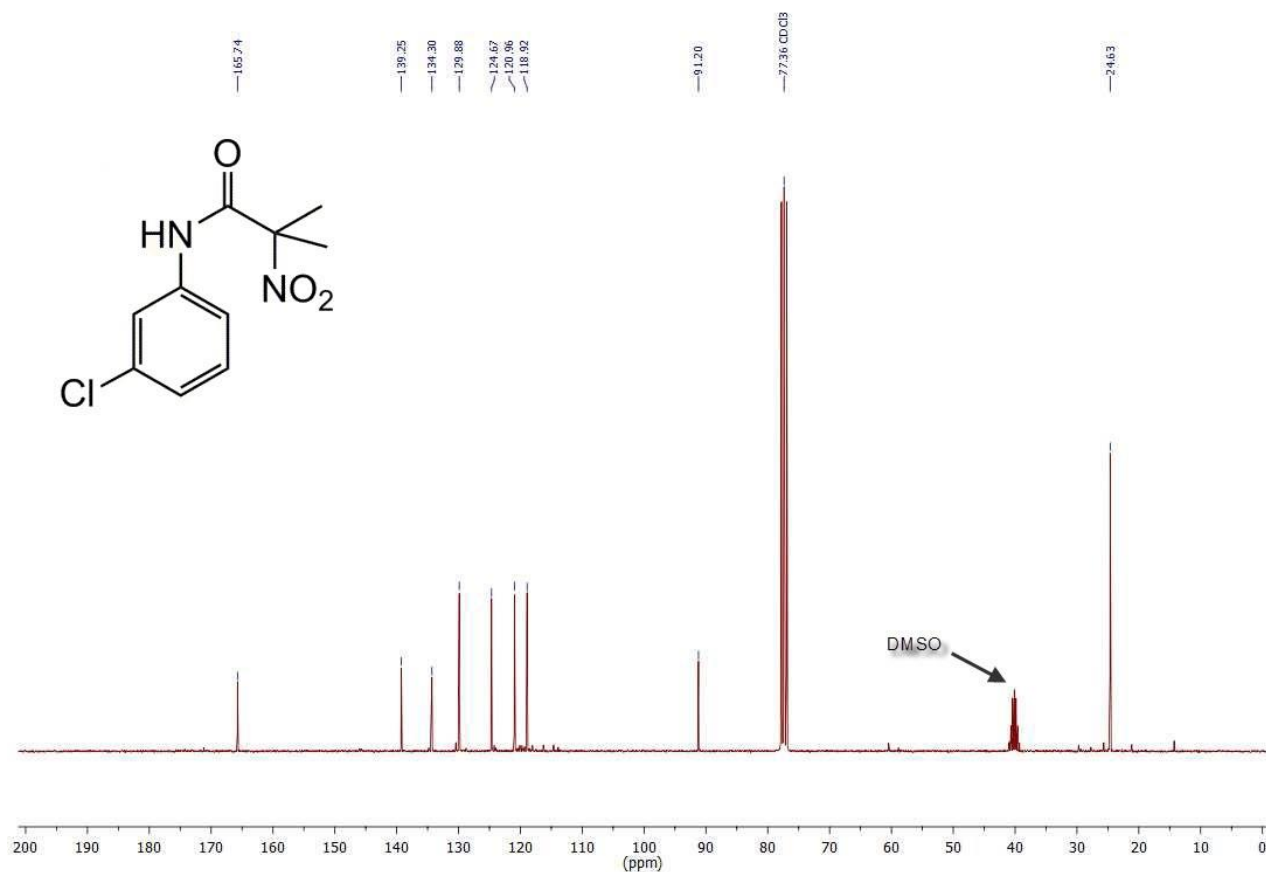

18 mg of **22** in 0.4 mL  $\text{CDCl}_3/2$  drops  $d_6$ -DMSO, 75 MHz, 15000 scans



ESI for:  
Bromo–nitro substitution on a tertiary  $\alpha$  carbon—a previously uncharacterized facet of the Kornblum substitution

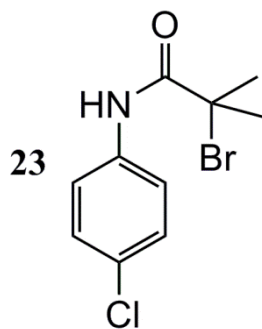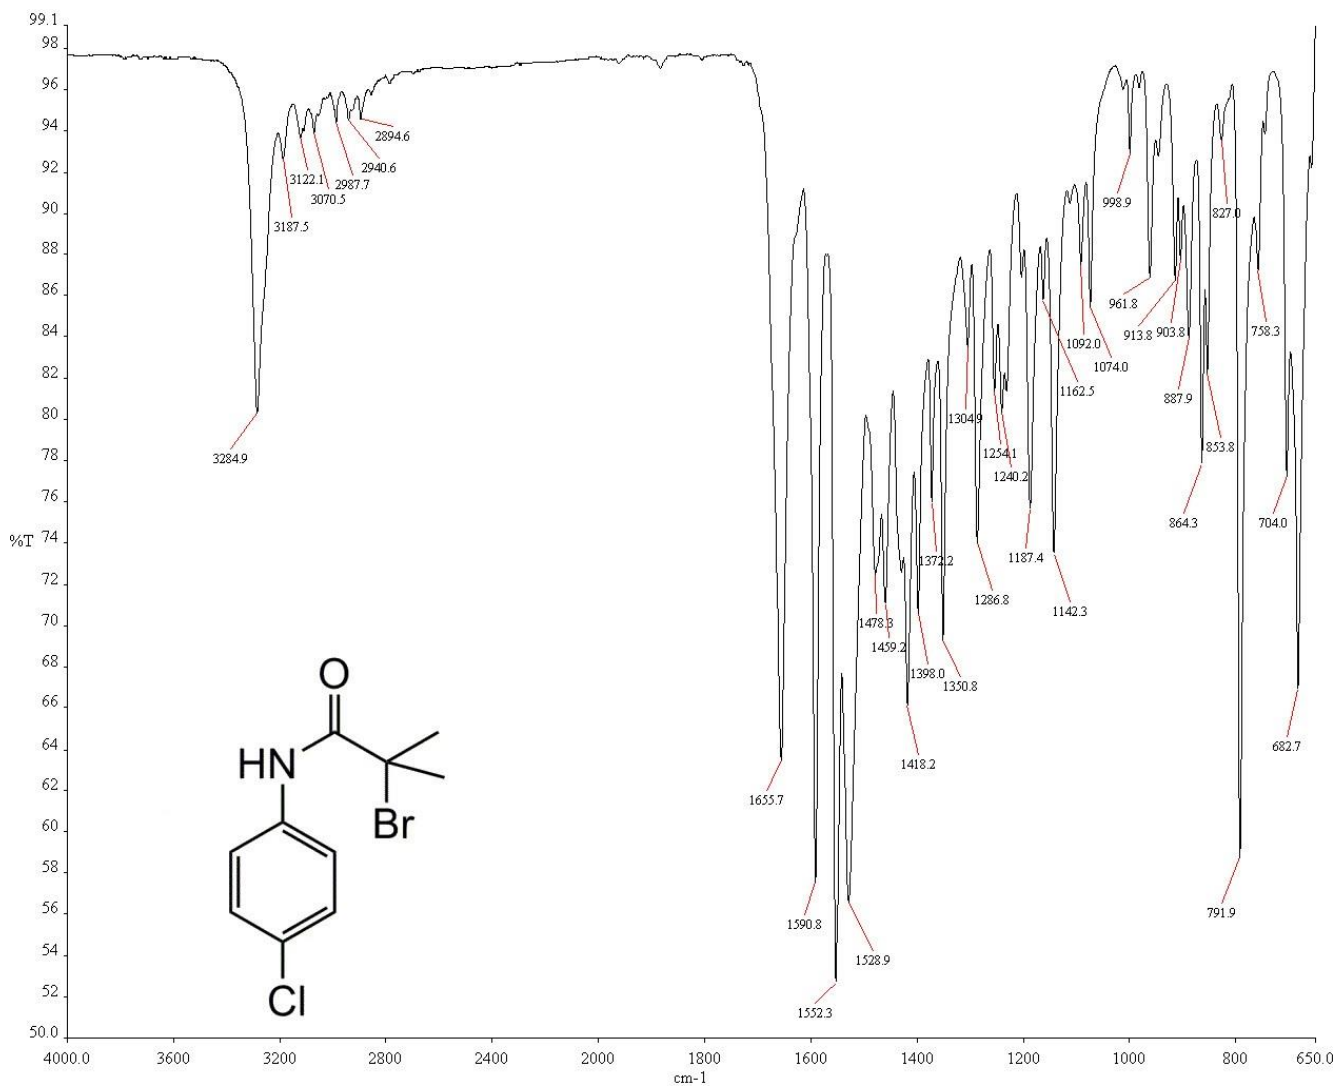

ESI for:

Bromo–nitro substitution on a tertiary  $\alpha$  carbon—a previously uncharacterized facet of the Kornblum substitution

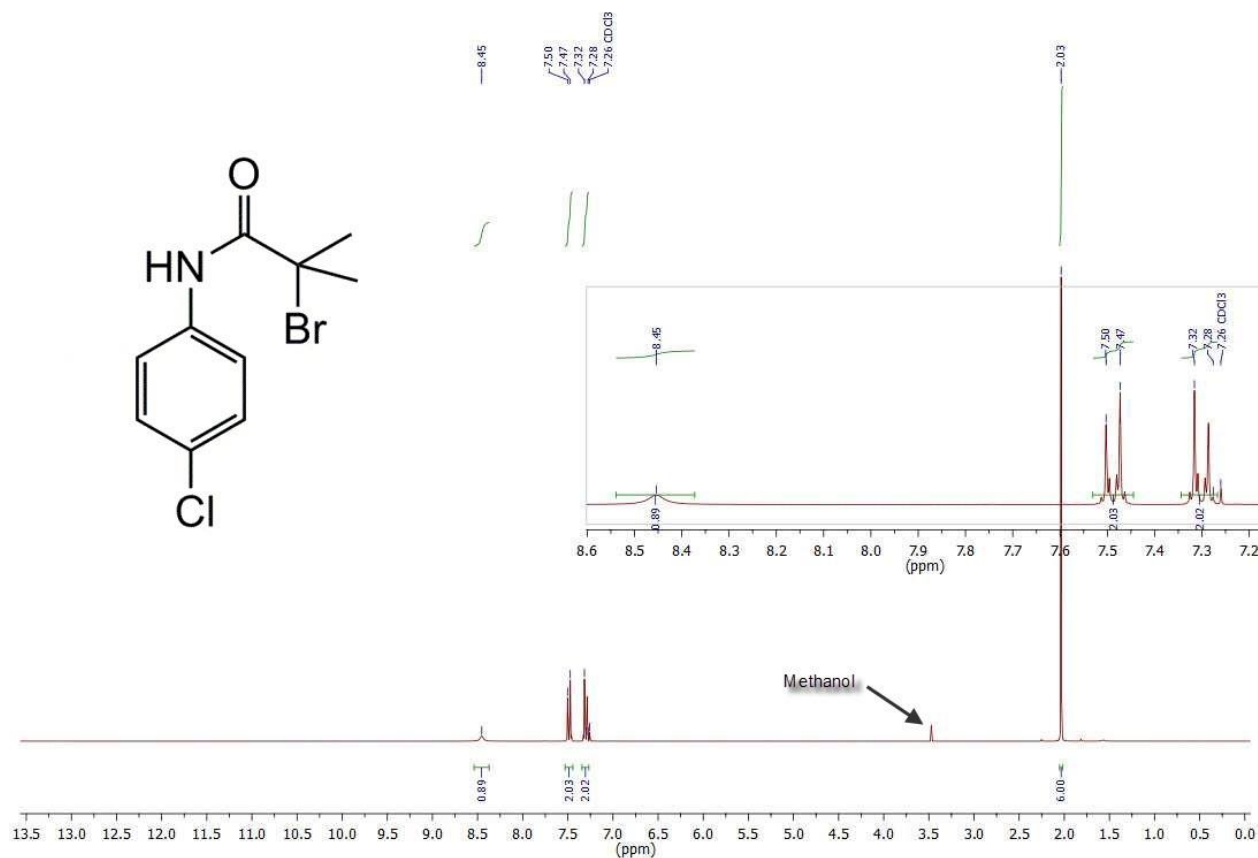

43 mg of **23** in 0.4 mL  $\text{CDCl}_3$ , 300 MHz, 16 scans

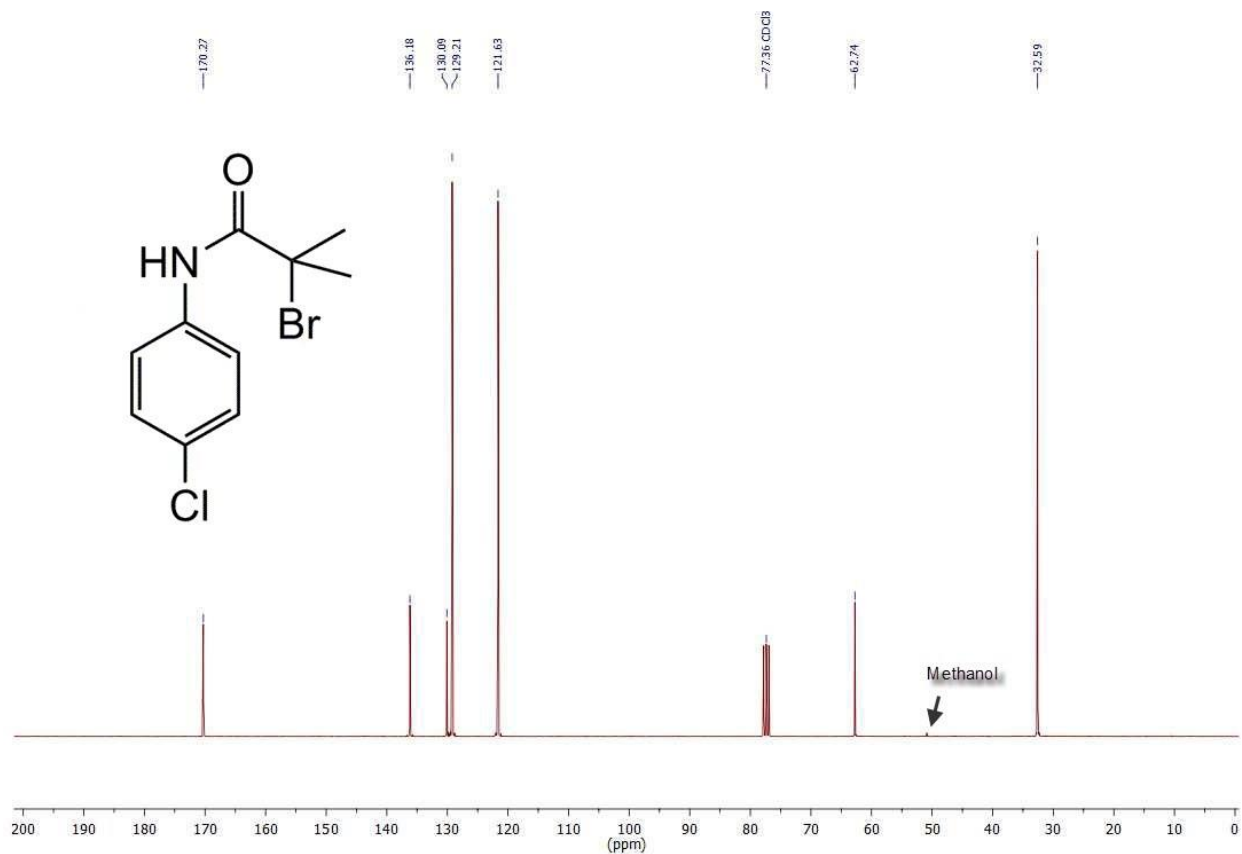

157 mg of **23** in 0.4 mL  $\text{CDCl}_3$ , 75 MHz, 14000 scans

ESI for:

Bromo–nitro substitution on a tertiary  $\alpha$  carbon—a previously uncharacterized facet of the Kornblum substitution

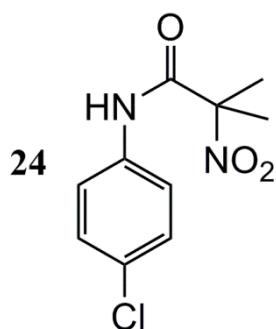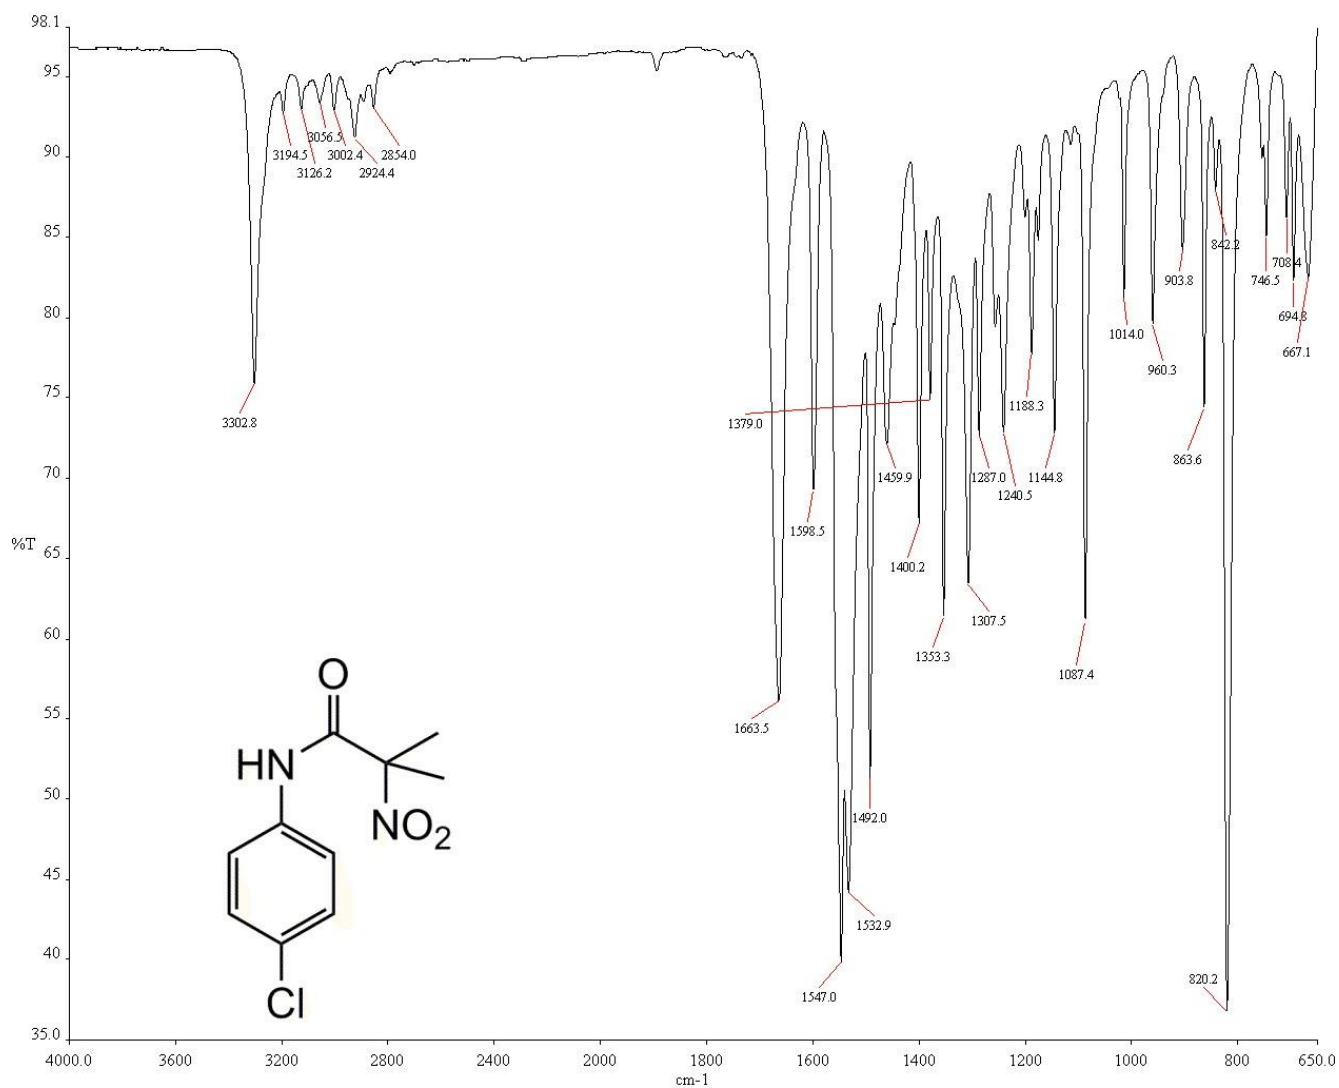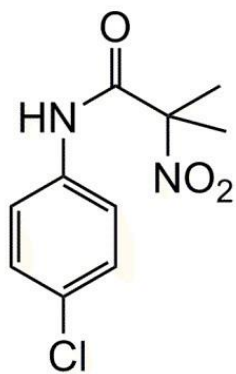

ESI for:

Bromo–nitro substitution on a tertiary  $\alpha$  carbon—a previously uncharacterized facet of the Kornblum substitution

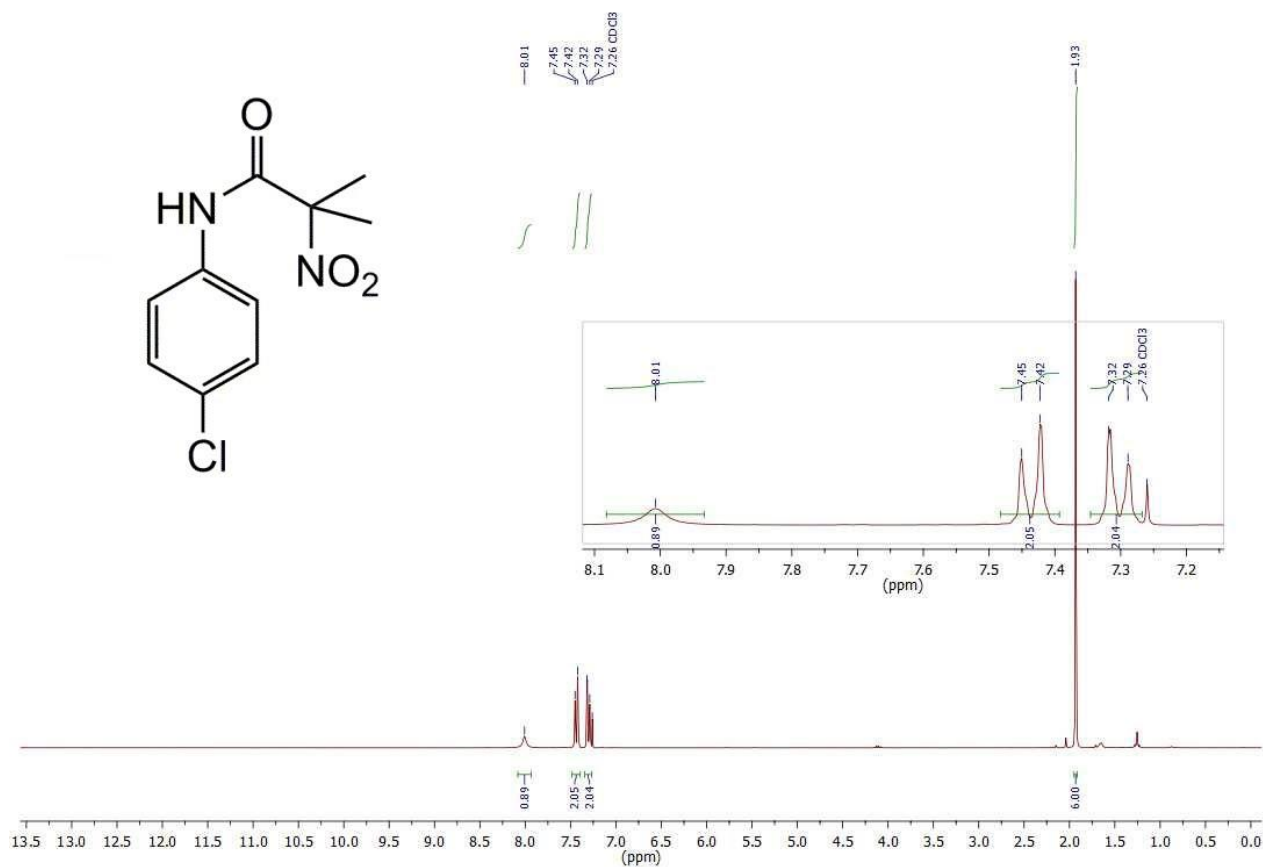

21 mg of **24** in 0.4 mL  $\text{CDCl}_3$ , 300 MHz, 16 scans

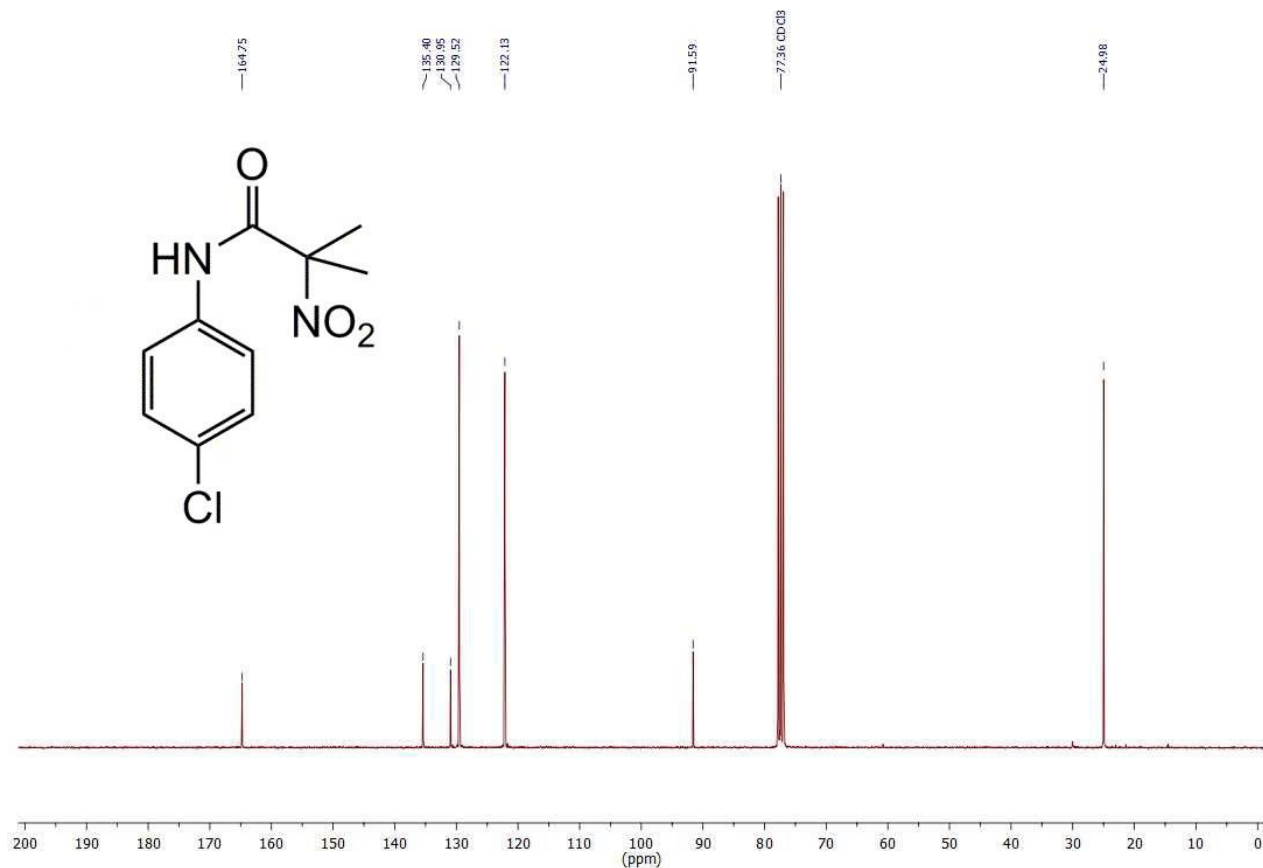

21 mg of **24** in 0.4 mL  $\text{CDCl}_3$ , 75 MHz, 14000 scans

ESI for:

Bromo–nitro substitution on a tertiary  $\alpha$  carbon—a previously uncharacterized facet of the Kornblum substitution

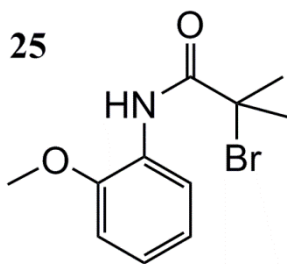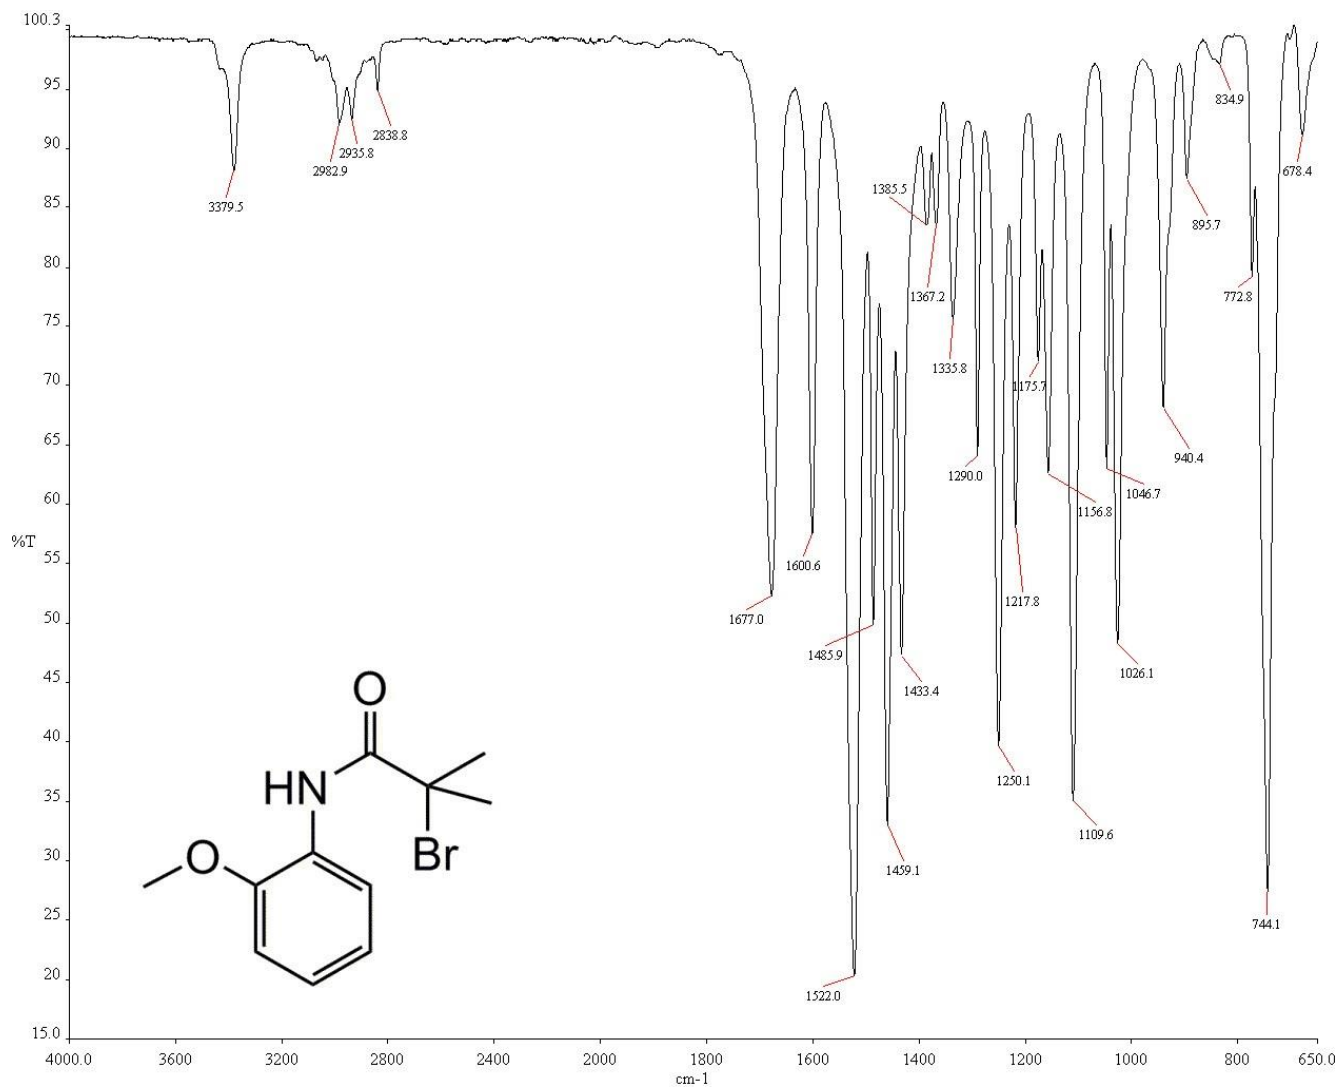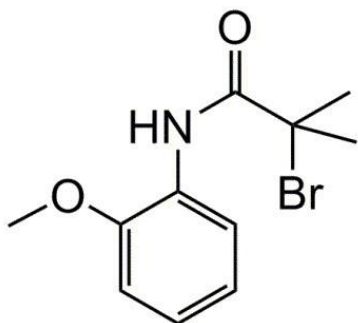

ESI for:

Bromo–nitro substitution on a tertiary  $\alpha$  carbon—a previously uncharacterized facet of the Kornblum substitution

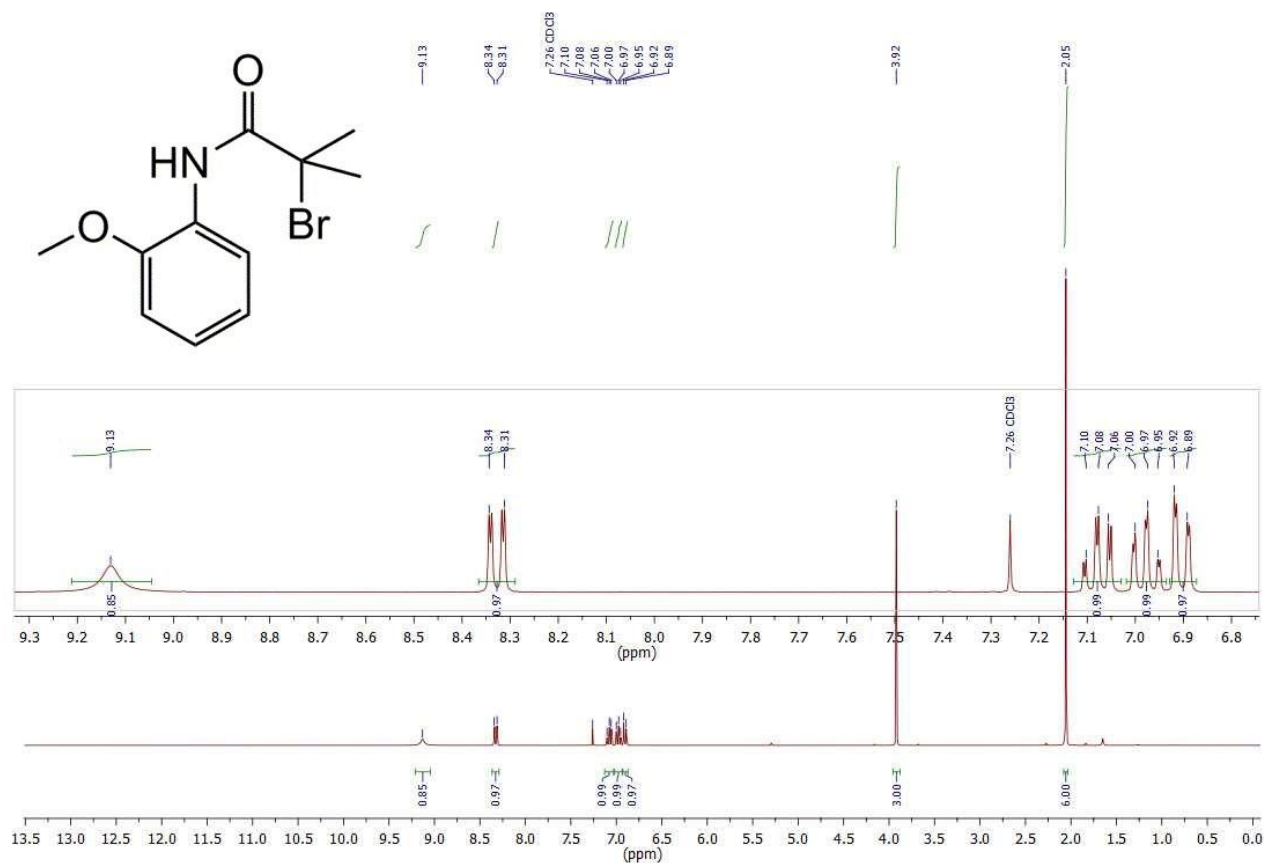

28 mg of **25** in 0.4 mL  $\text{CDCl}_3$ , 300 MHz, 32 scans

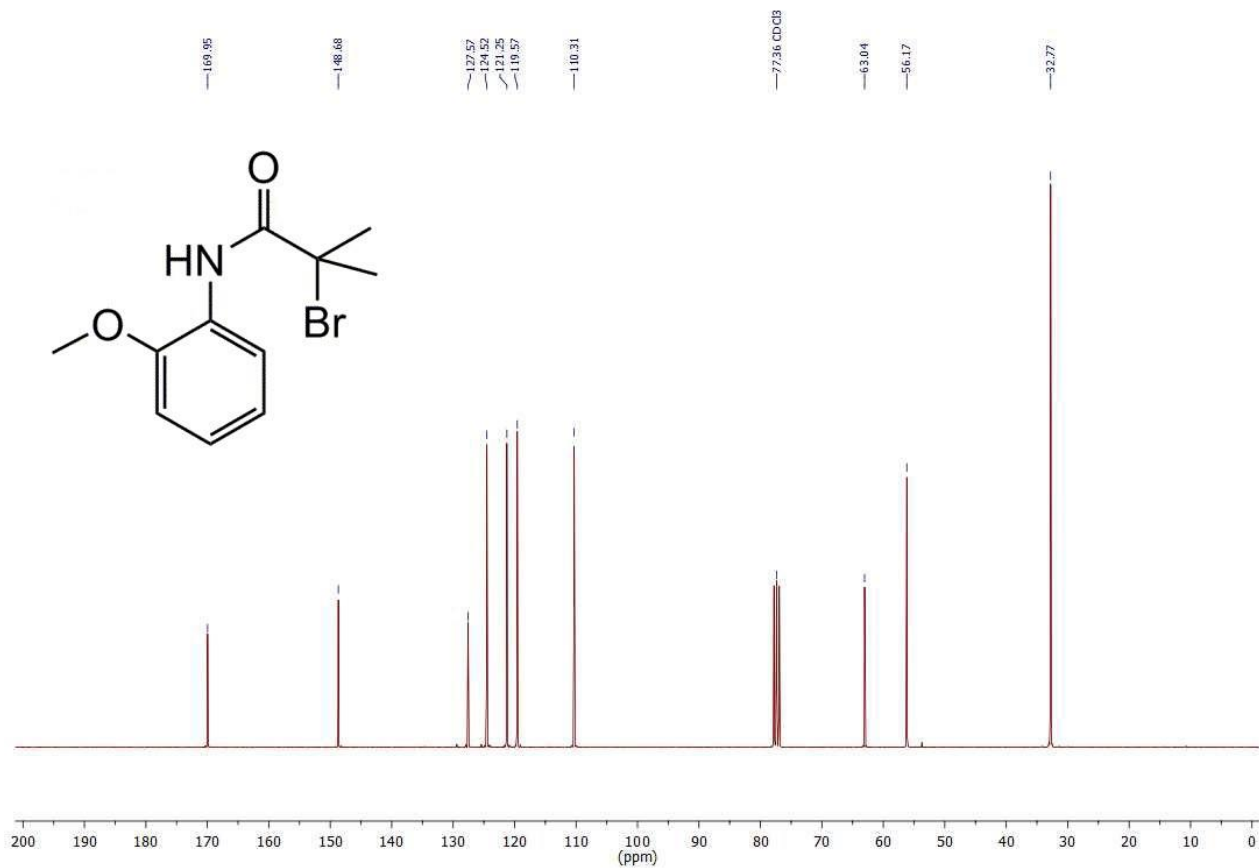

133 mg of **25** in 0.4 mL  $\text{CDCl}_3$ , 75 MHz, 14000 scans

ESI for:  
Bromo–nitro substitution on a tertiary  $\alpha$  carbon—a previously uncharacterized facet of the Kornblum substitution

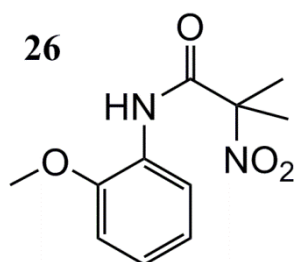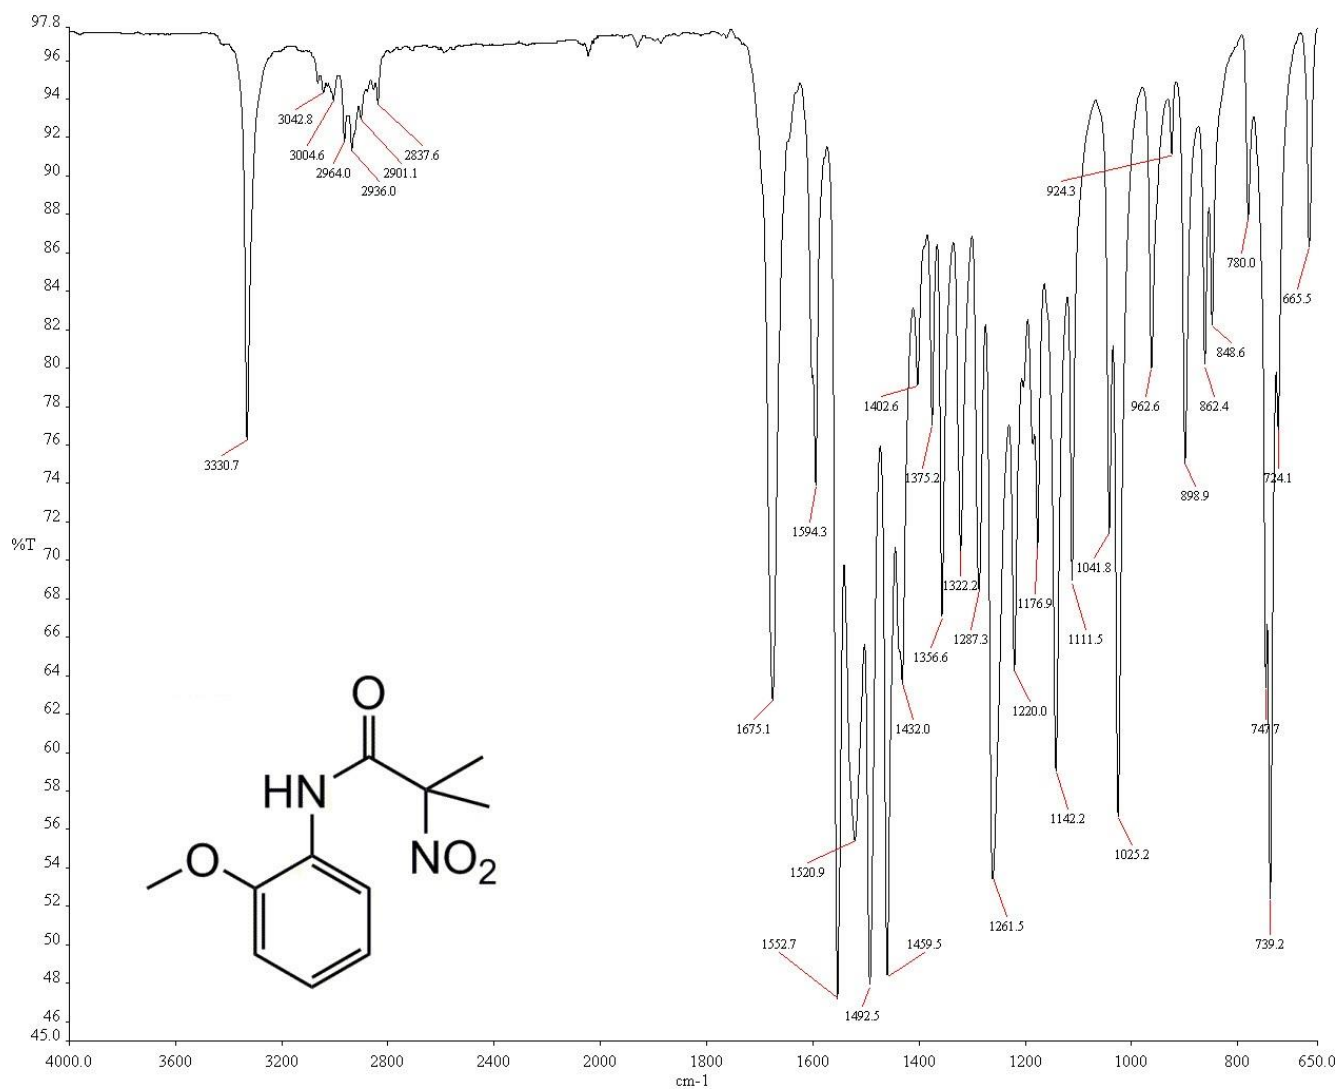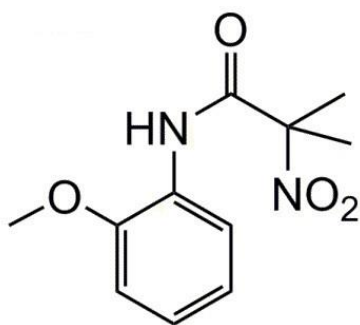

ESI for:

Bromo–nitro substitution on a tertiary  $\alpha$  carbon—a previously uncharacterized facet of the Kornblum substitution

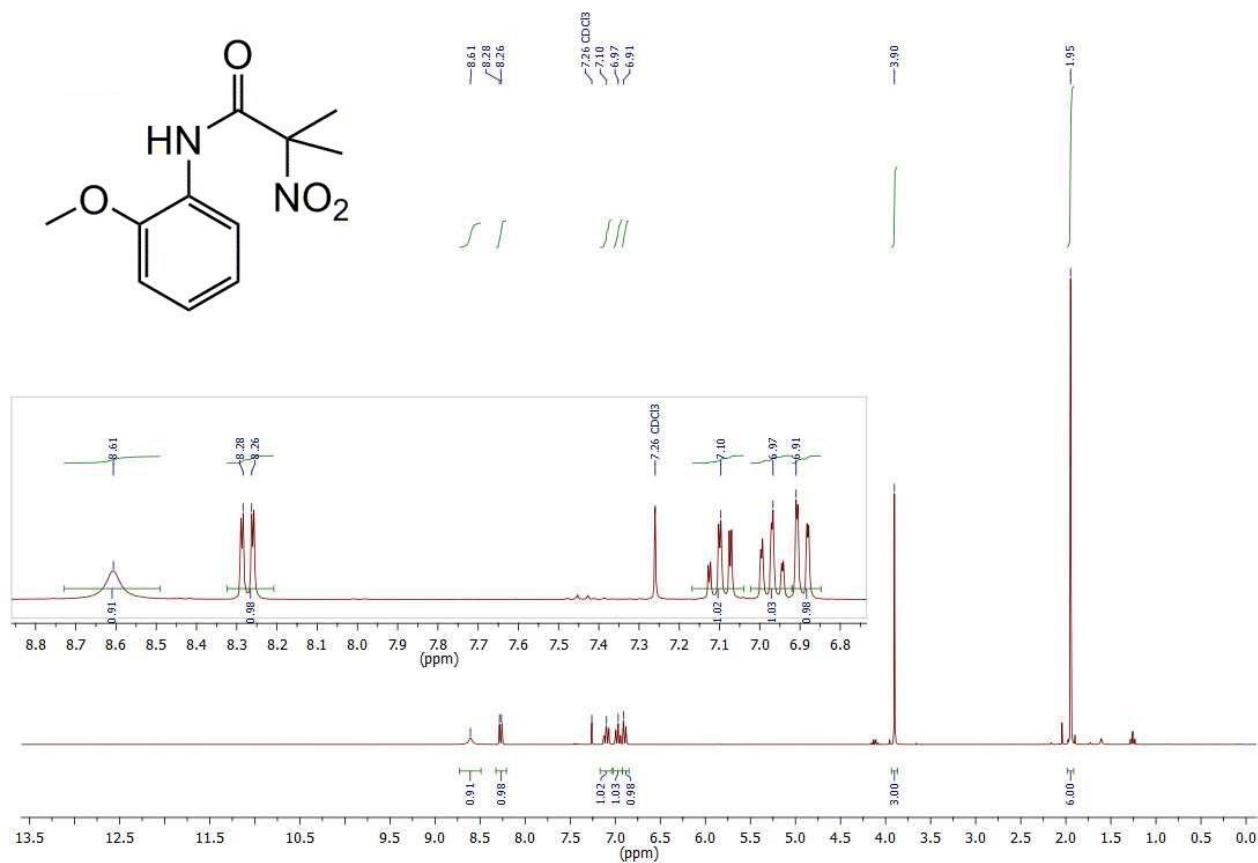

19 mg of **26** in 0.4 mL CDCl<sub>3</sub>, 300 MHz, 16 scans

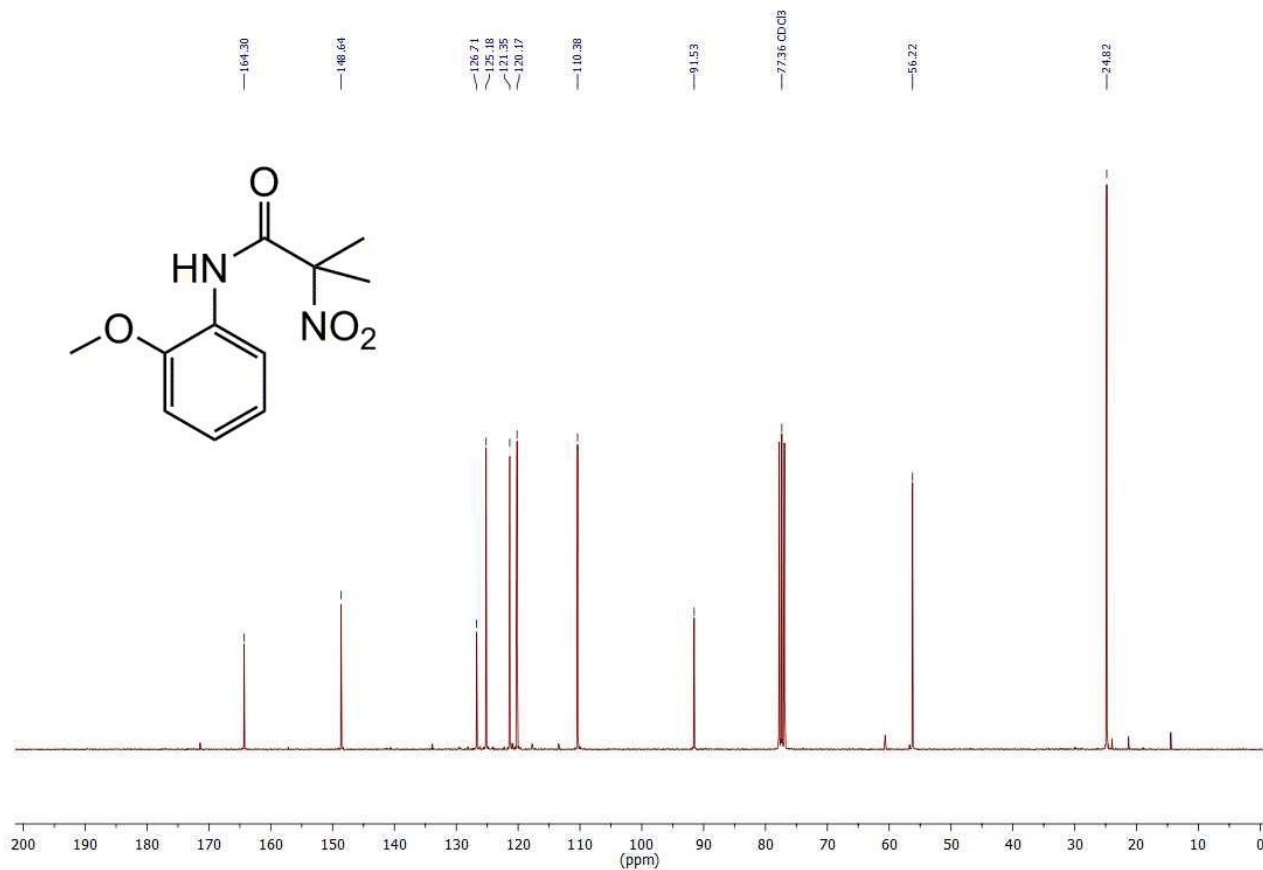

57 mg of **26** in 0.4 mL CDCl<sub>3</sub>, 75 MHz, 14000 scans



ESI for:

Bromo–nitro substitution on a tertiary  $\alpha$  carbon—a previously uncharacterized facet of the Kornblum substitution

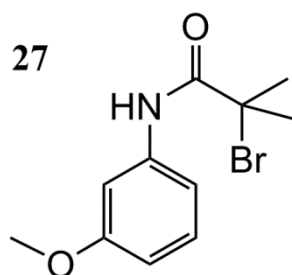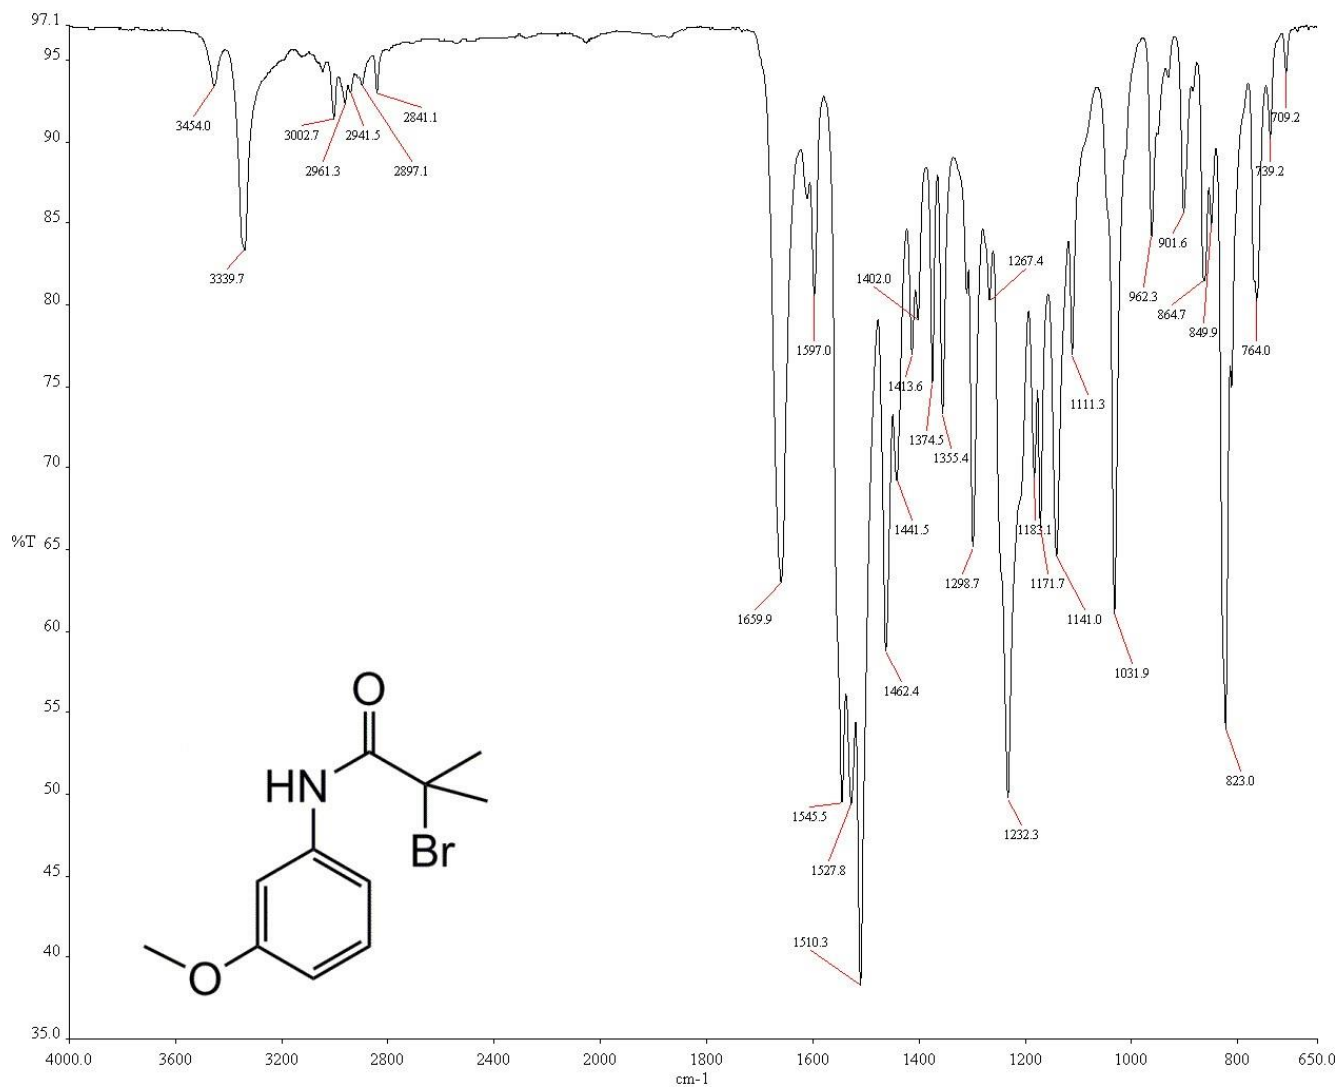

ESI for:

Bromo–nitro substitution on a tertiary  $\alpha$  carbon—a previously uncharacterized facet of the Kornblum substitution

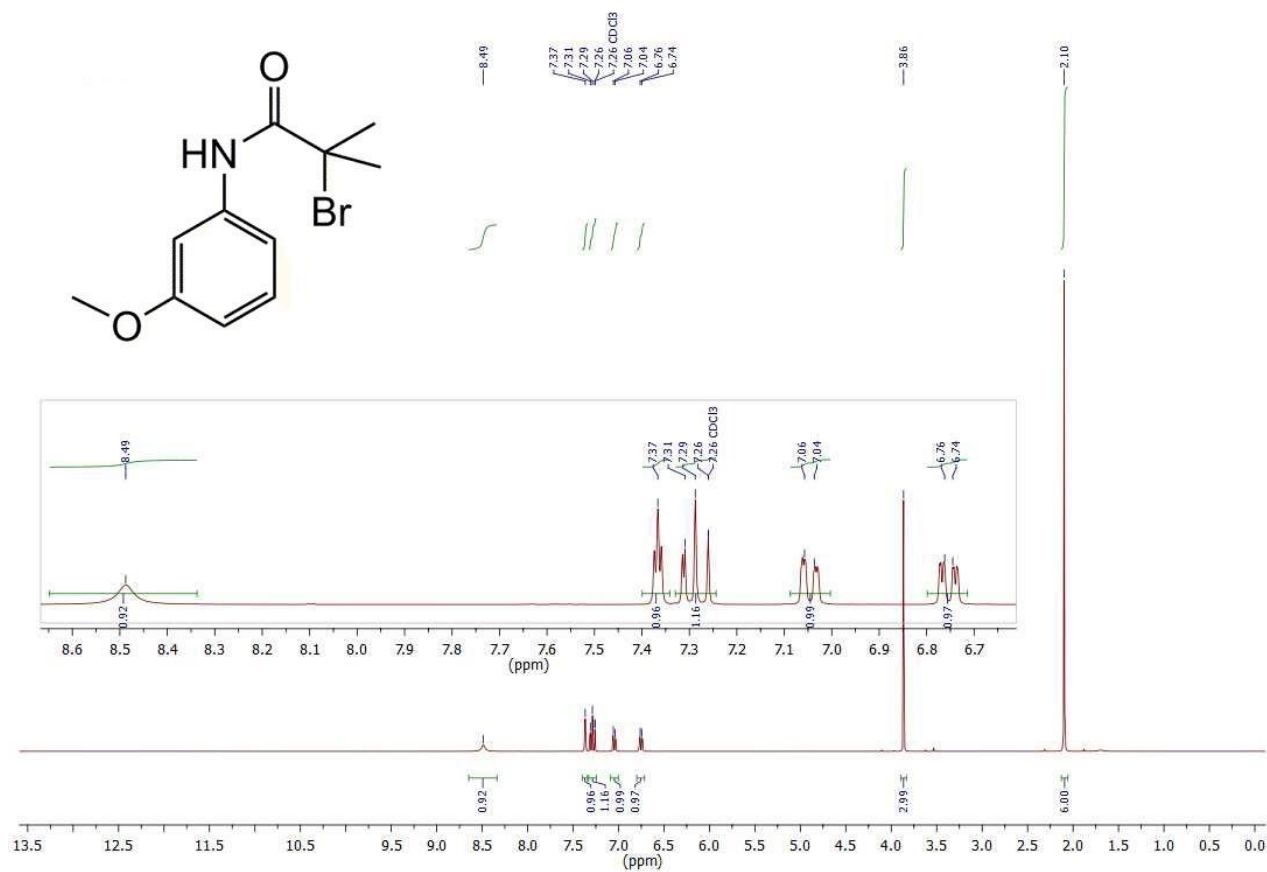

31 mg of **27** in 0.4 mL  $\text{CDCl}_3$ , 300 MHz, 128 scans

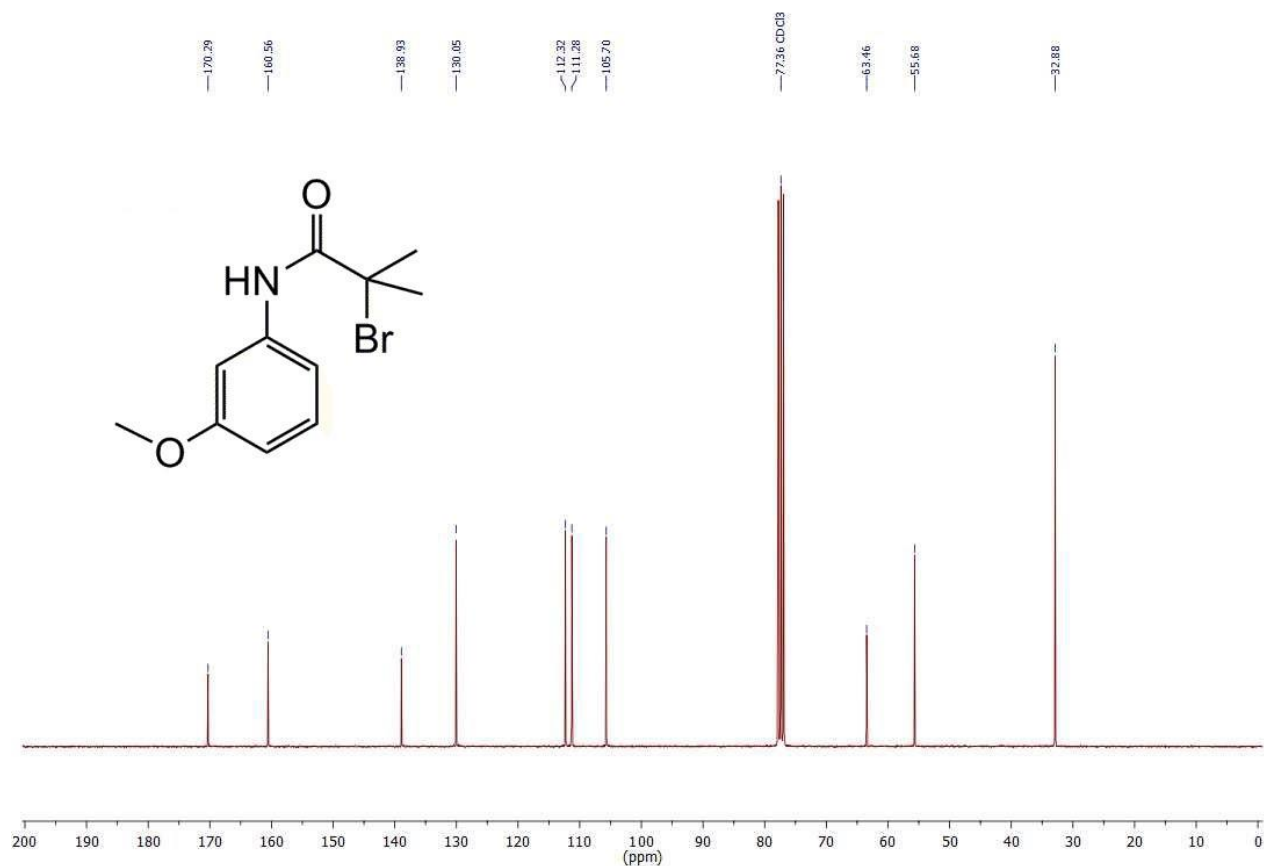

31 mg of **27** in 0.4 mL  $\text{CDCl}_3$ , 75 MHz, 14000 scans

ESI for:

Bromo–nitro substitution on a tertiary  $\alpha$  carbon—a previously uncharacterized facet of the Kornblum substitution

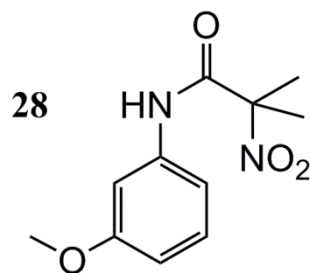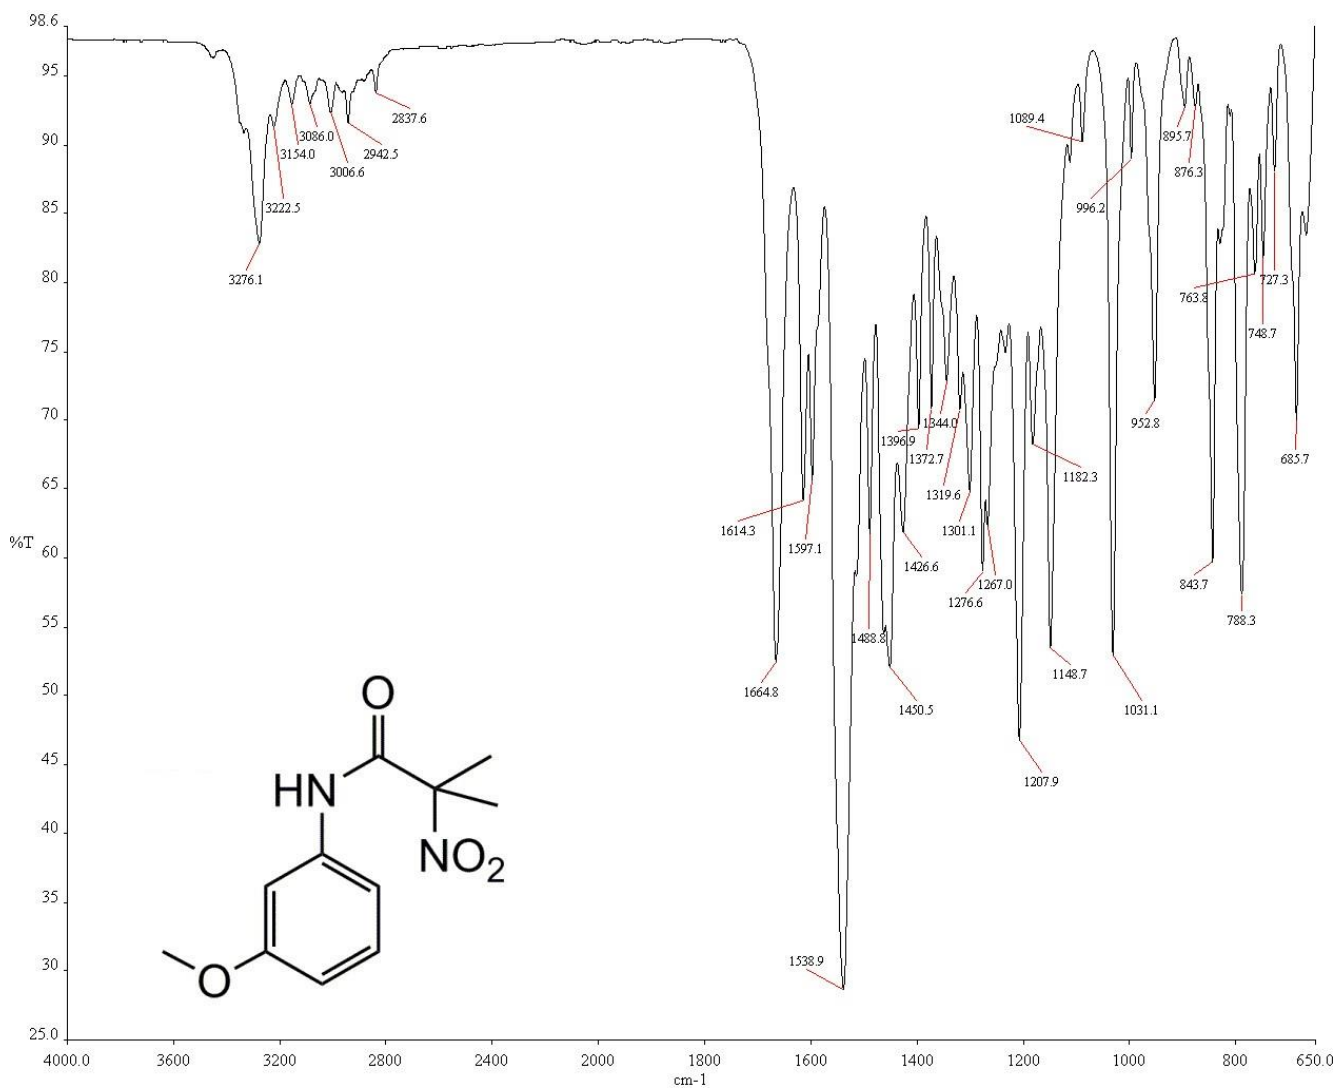

ESI for:

Bromo–nitro substitution on a tertiary  $\alpha$  carbon—a previously uncharacterized facet of the Kornblum substitution

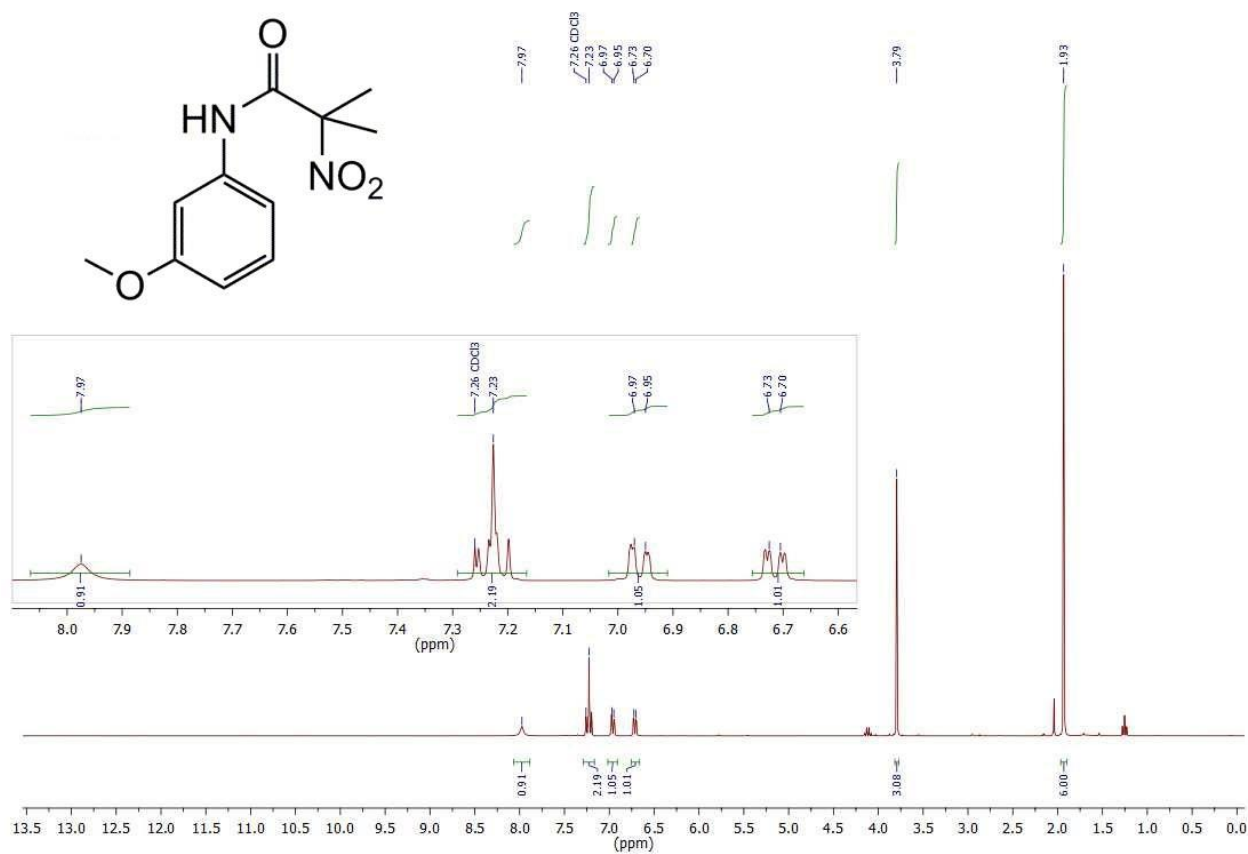

28 mg of **28** in 0.4 mL CDCl<sub>3</sub>, 300 MHz, 16 scans

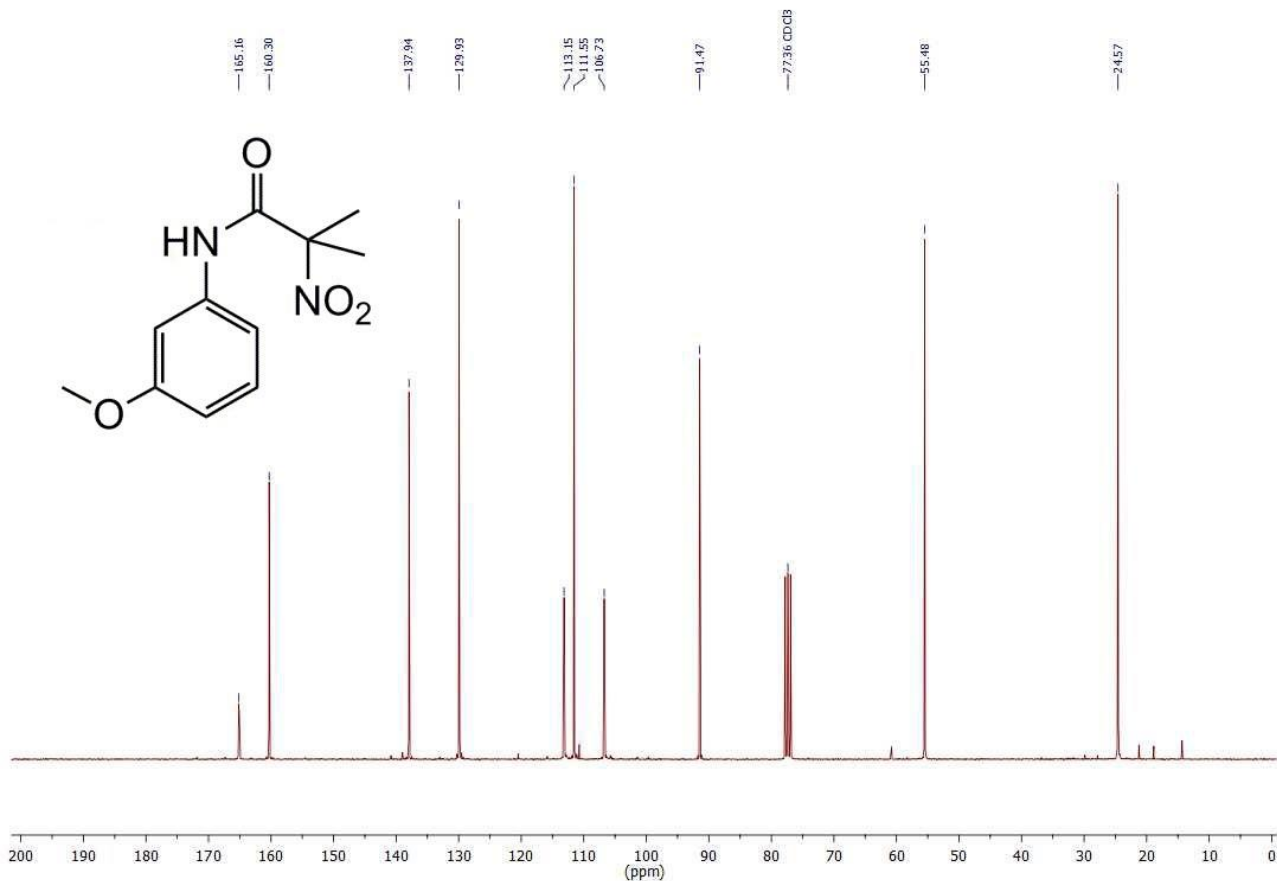

120 mg of **28** in 0.4 mL CDCl<sub>3</sub>, 75 MHz, 15000 scans

ESI for:

Bromo–nitro substitution on a tertiary  $\alpha$  carbon—a previously uncharacterized facet of the Kornblum substitution

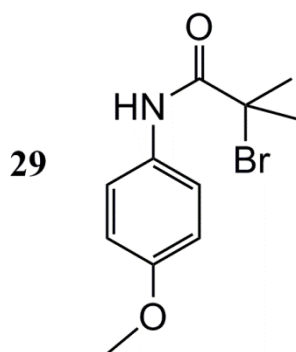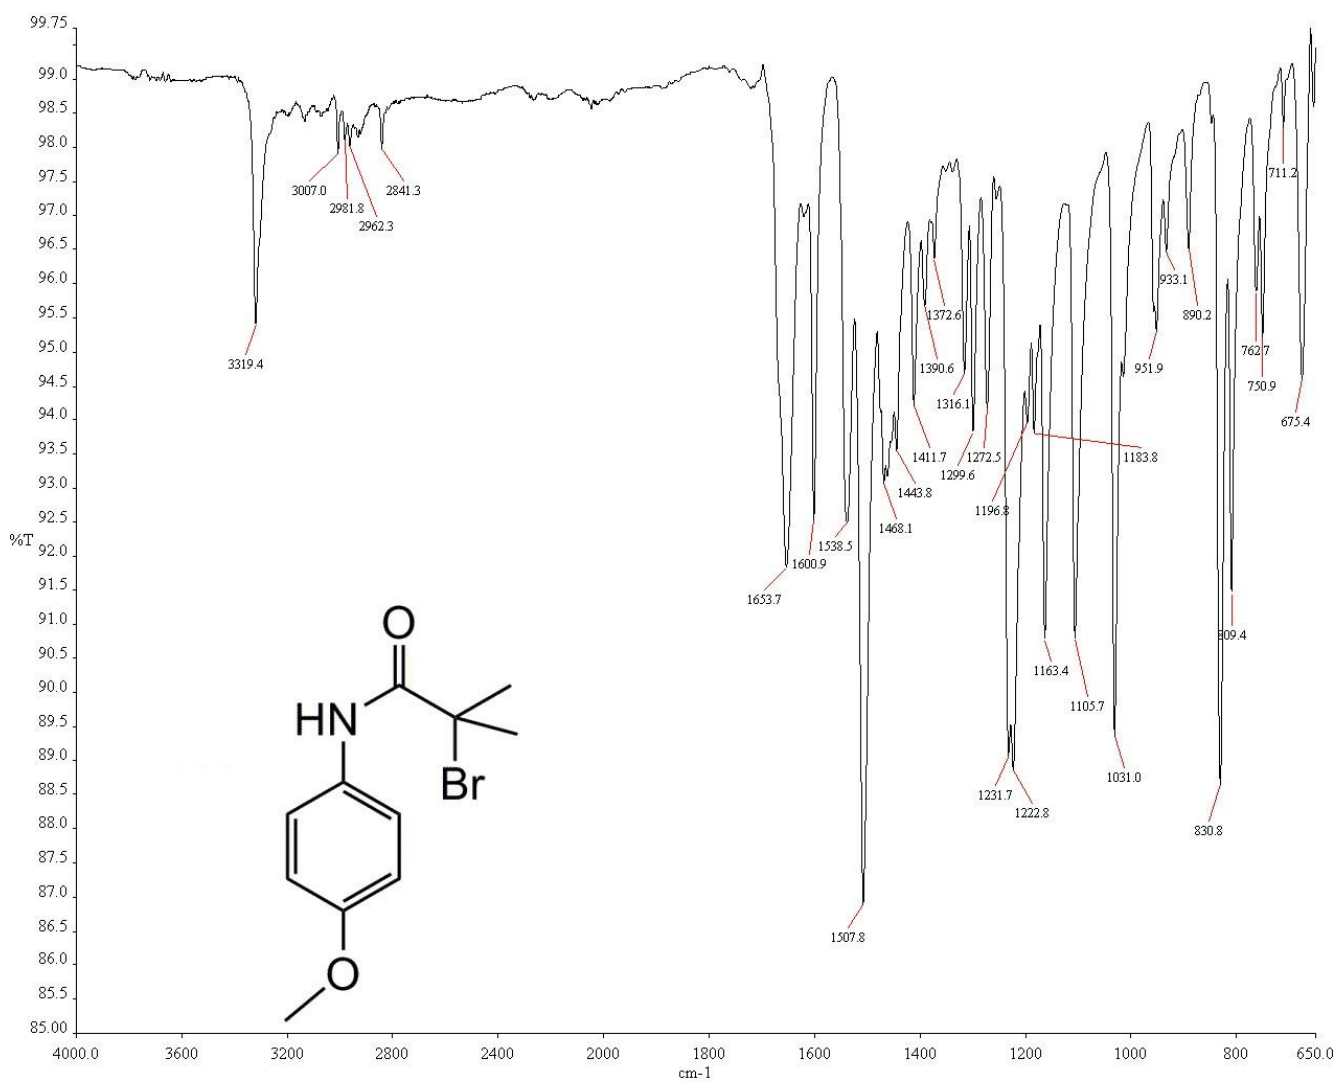

ESI for:

Bromo–nitro substitution on a tertiary  $\alpha$  carbon—a previously uncharacterized facet of the Kornblum substitution

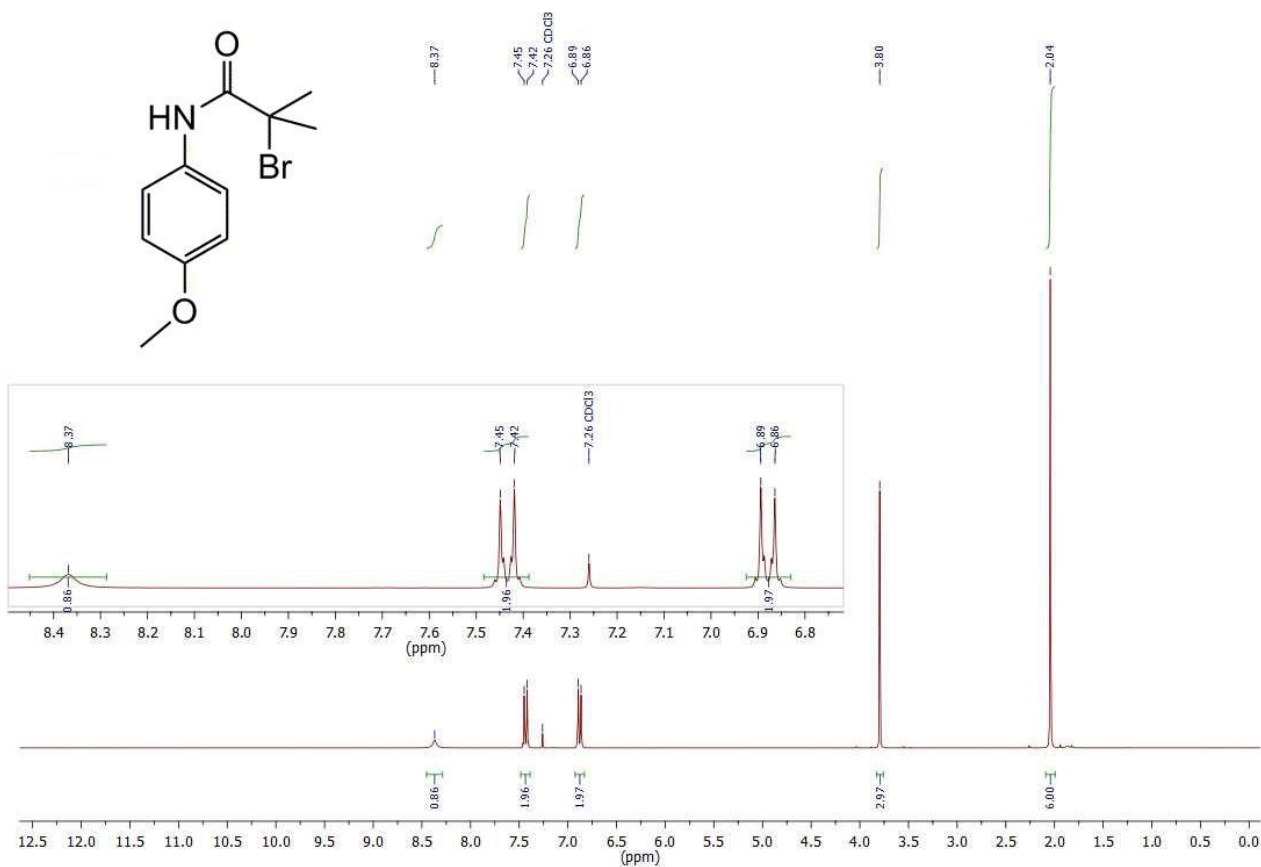

25 mg of **29** in 0.4 mL  $\text{CDCl}_3$ , 300 MHz, 350 scans

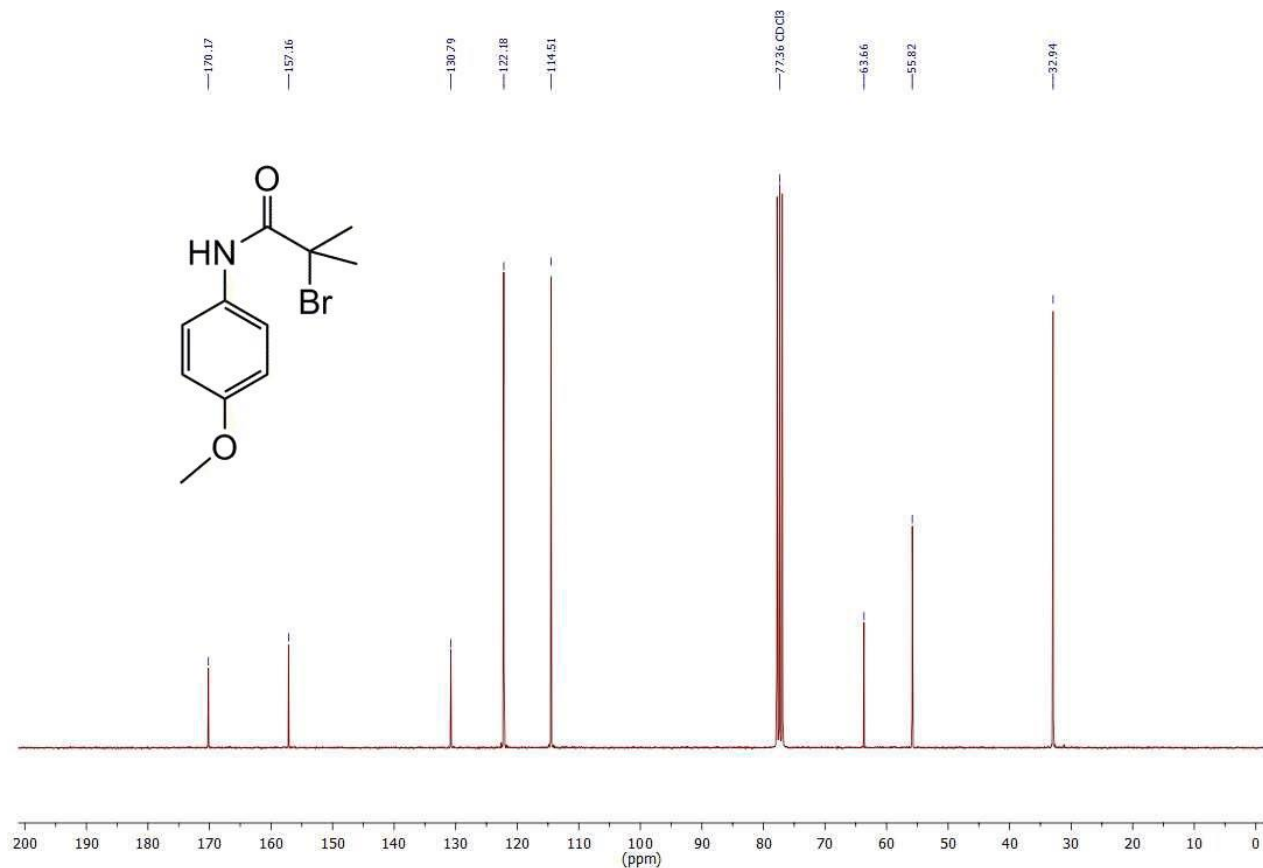

25 mg of **29** in 0.4 mL  $\text{CDCl}_3$ , 75 MHz, 14000 scans

ESI for:  
Bromo–nitro substitution on a tertiary  $\alpha$  carbon—a previously uncharacterized facet of the Kornblum substitution

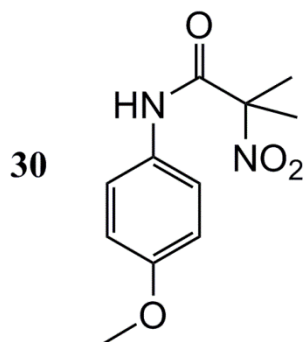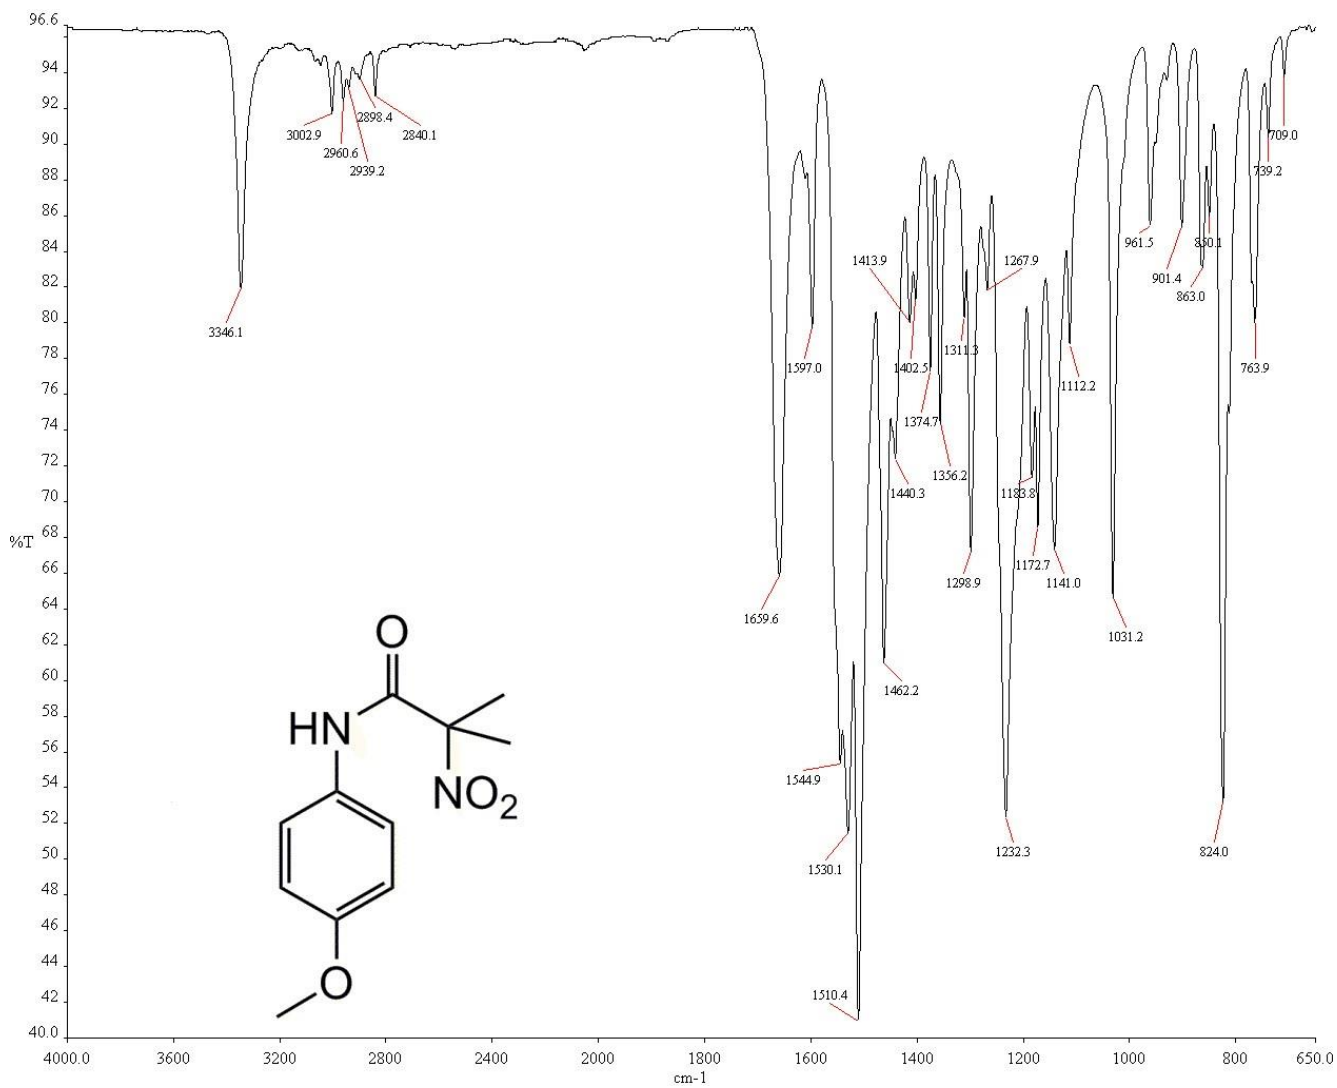

ESI for:

Bromo–nitro substitution on a tertiary  $\alpha$  carbon—a previously uncharacterized facet of the Kornblum substitution

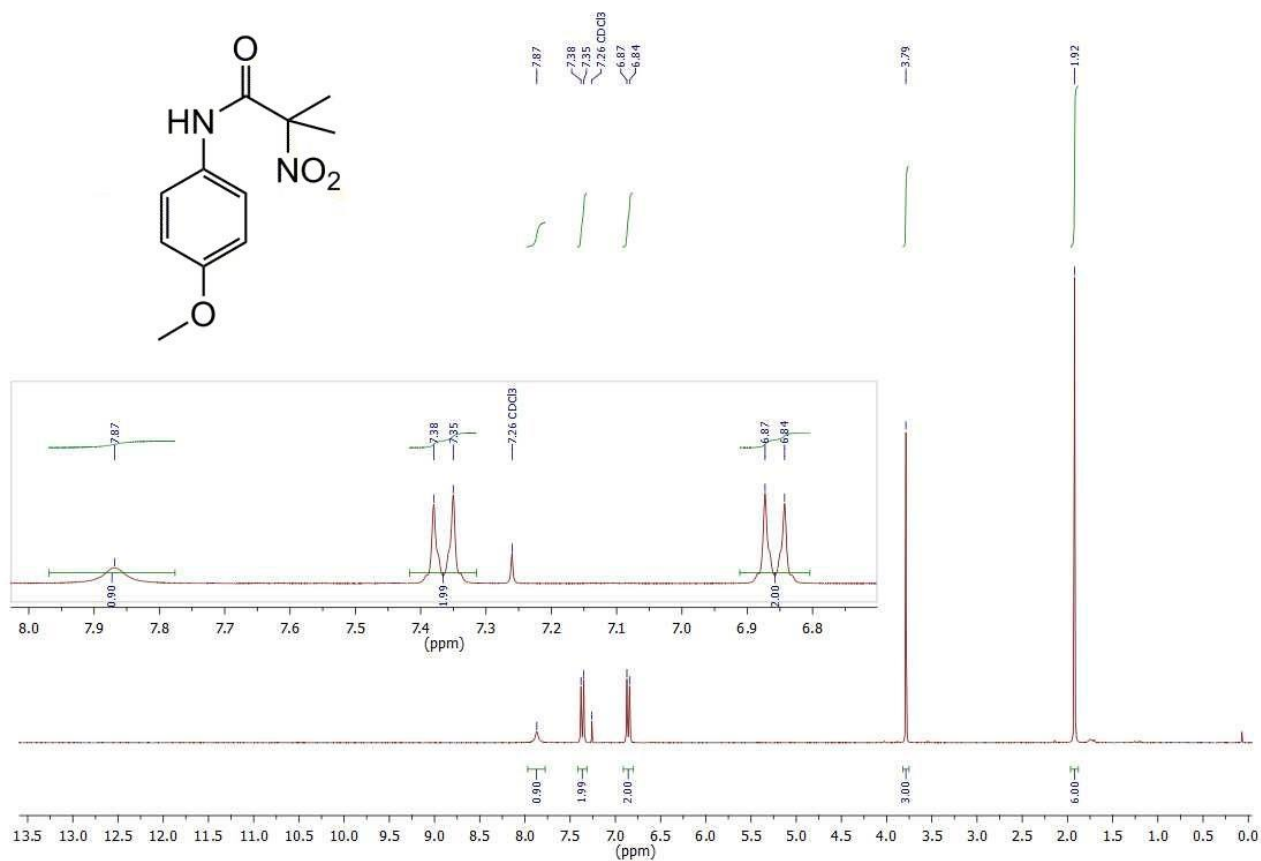

24 mg of **30** in 0.4 mL  $\text{CDCl}_3$ , 300 MHz, 32 scans

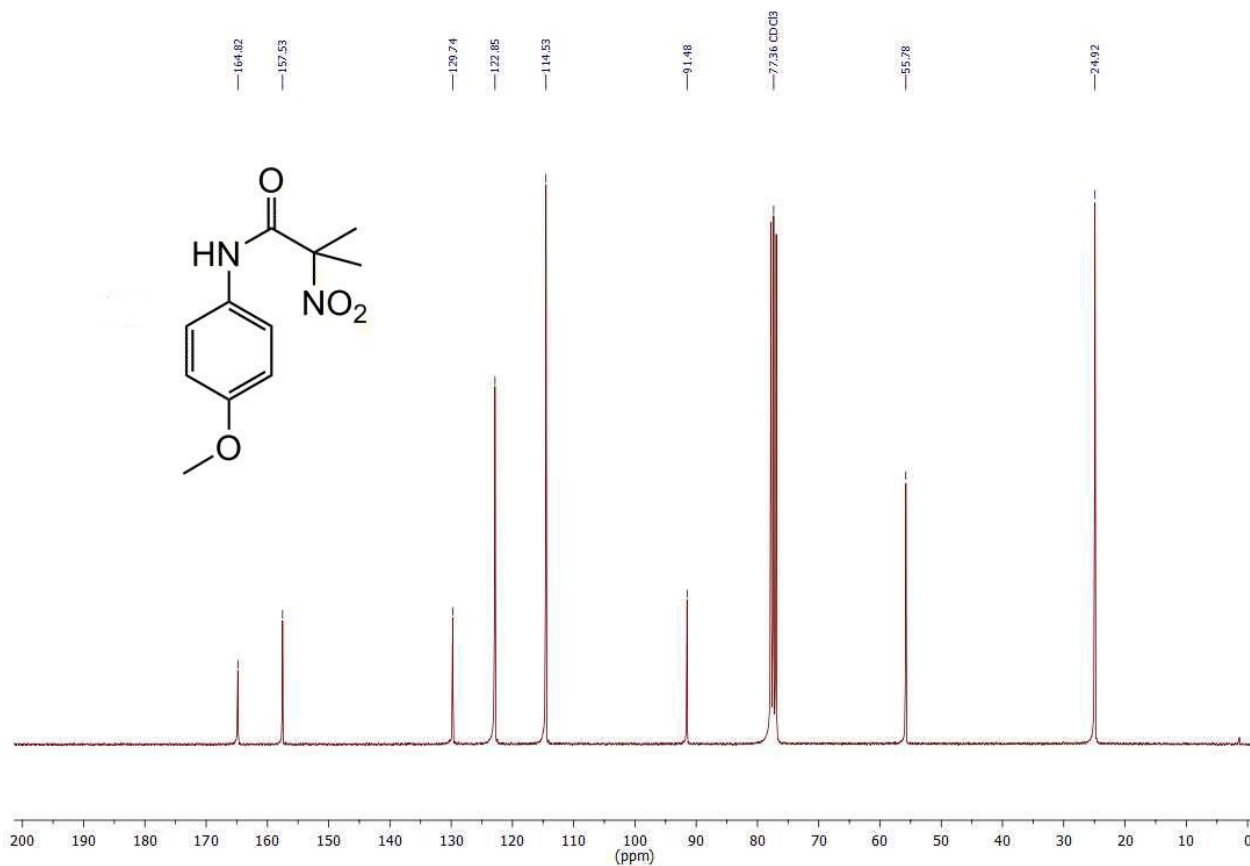

24 mg of **30** in 0.4 mL  $\text{CDCl}_3$ , 75 MHz, 36302 scans



ESI for:

Bromo-nitro substitution on a tertiary  $\alpha$  carbon—a previously uncharacterized facet of the Kornblum substitution

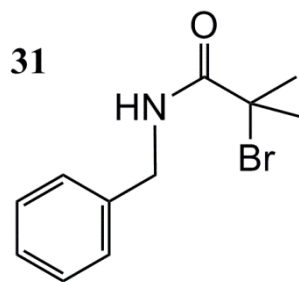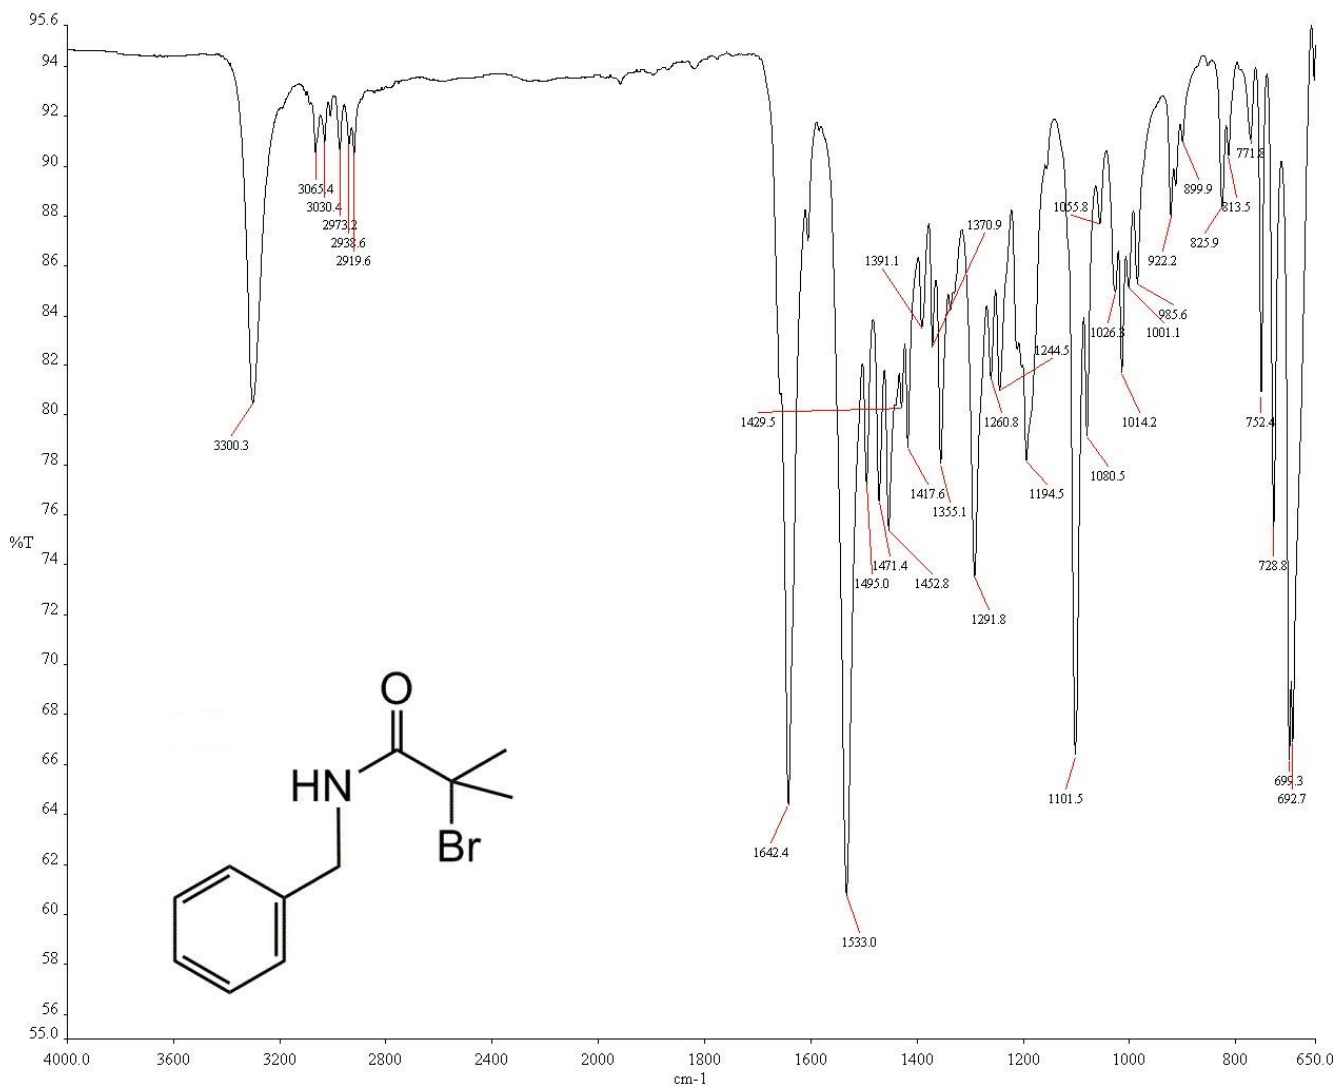

ESI for:

Bromo–nitro substitution on a tertiary  $\alpha$  carbon—a previously uncharacterized facet of the Kornblum substitution

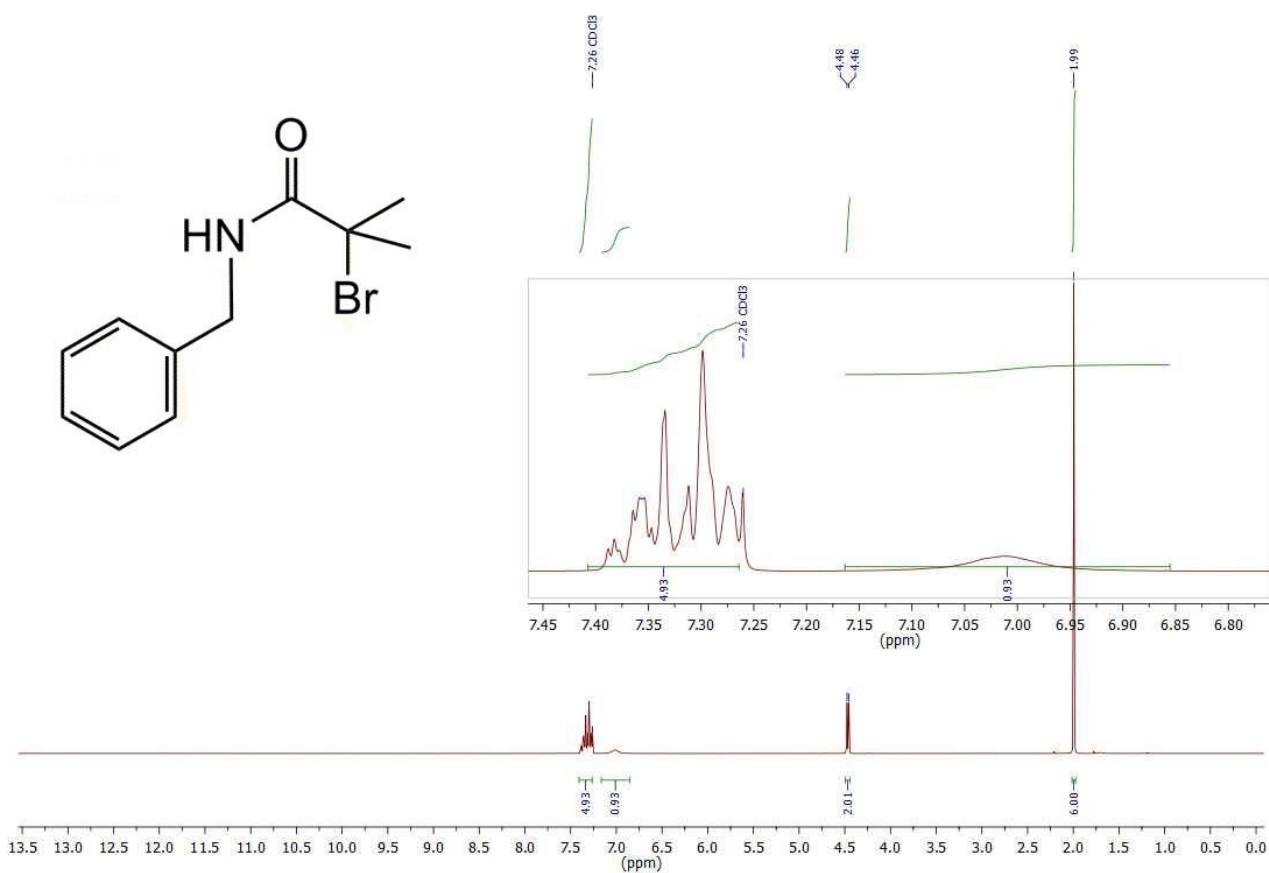

23 mg of **31** in 0.4 mL  $\text{CDCl}_3$ , 300 MHz, 16 scans

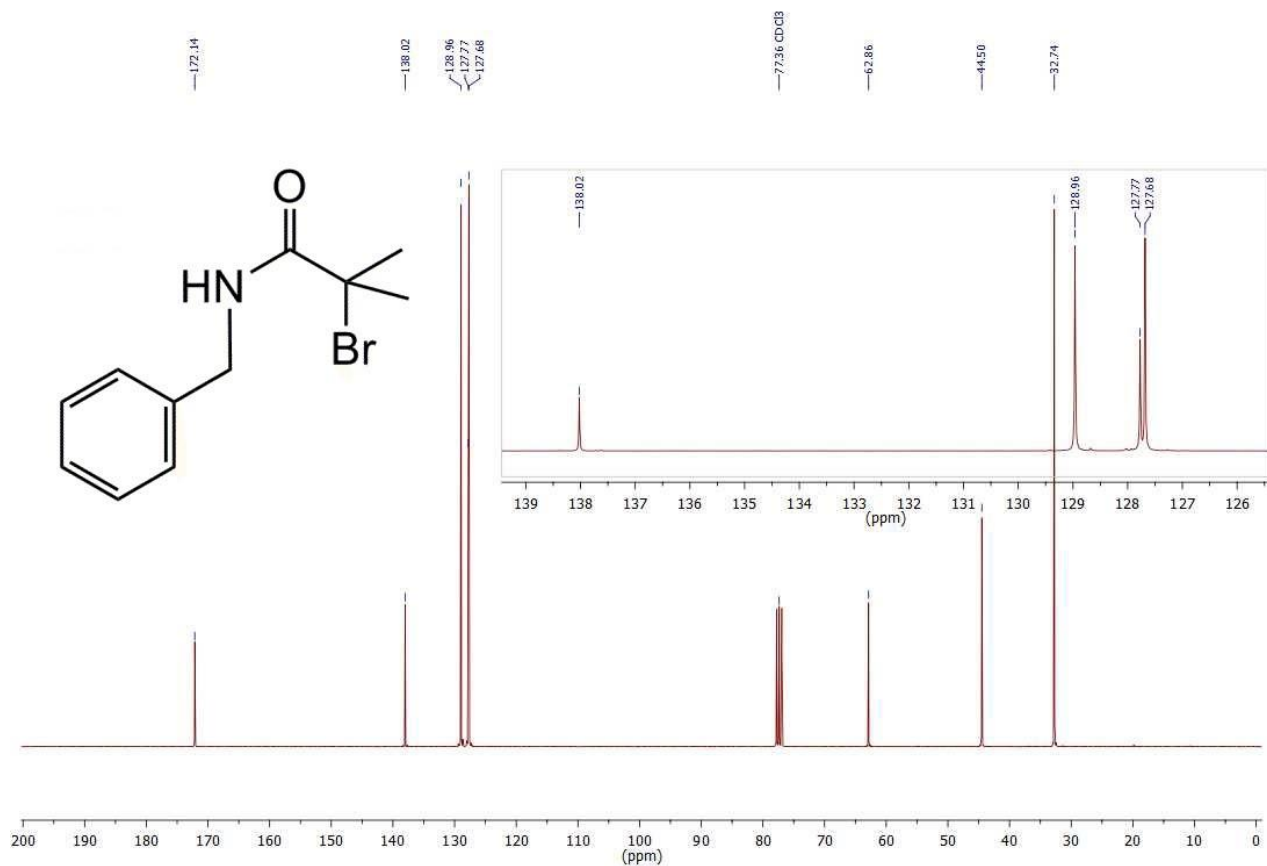

125 mg of **31** in 0.4 mL  $\text{CDCl}_3$ , 75 MHz, 13720 scans

ESI for:  
Bromo–nitro substitution on a tertiary  $\alpha$  carbon—a previously uncharacterized facet of the Kornblum substitution

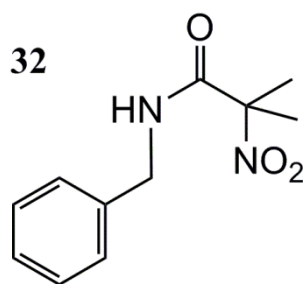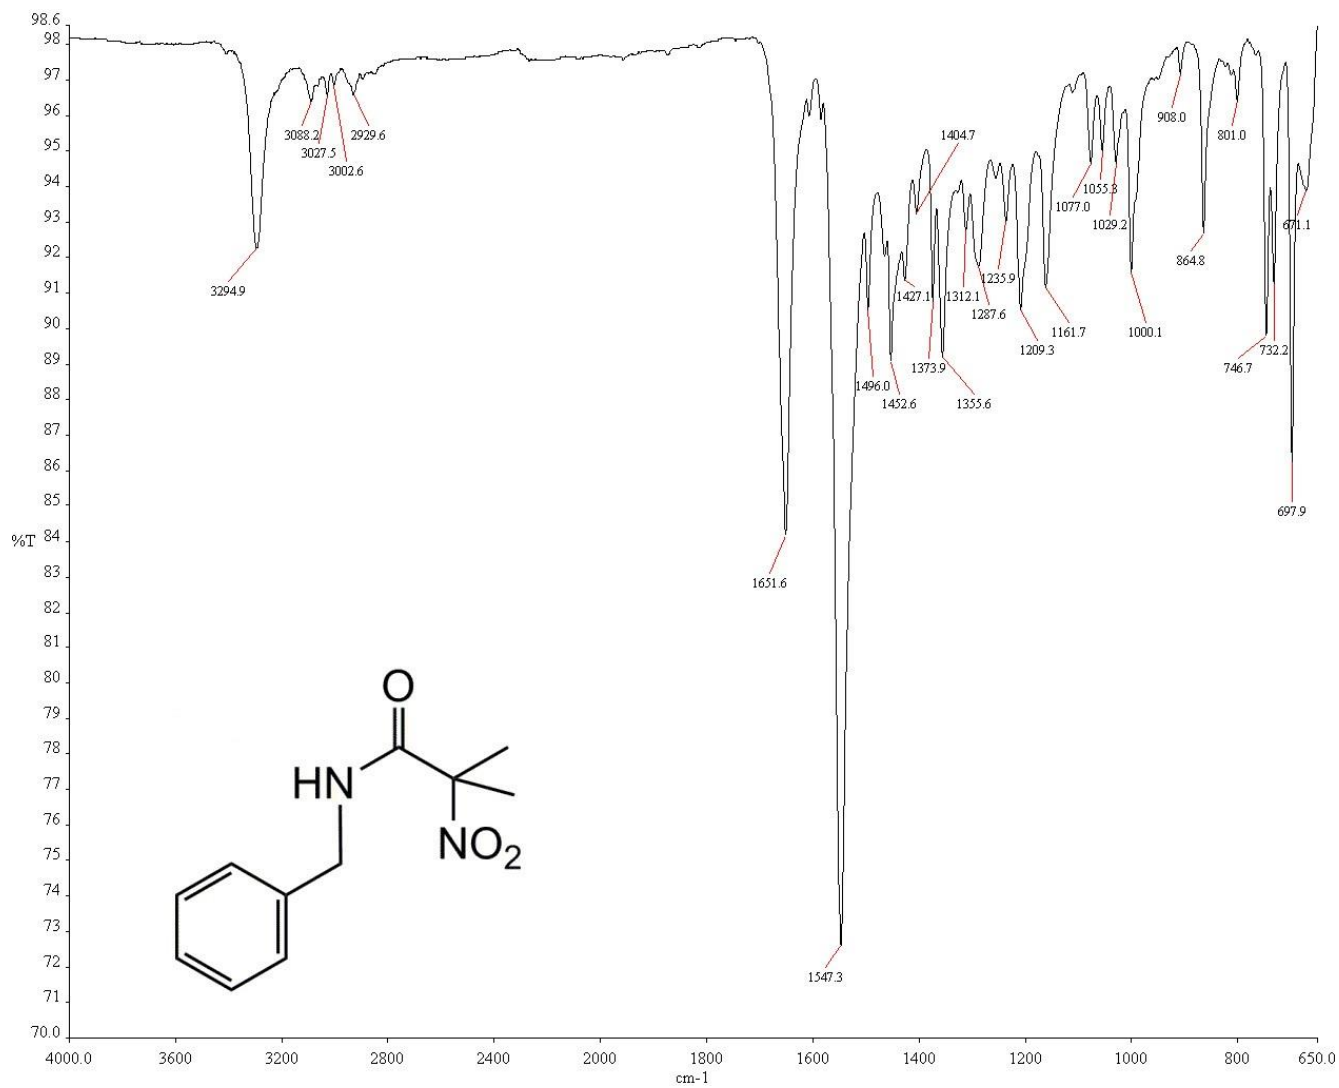

ESI for:

Bromo–nitro substitution on a tertiary  $\alpha$  carbon—a previously uncharacterized facet of the Kornblum substitution

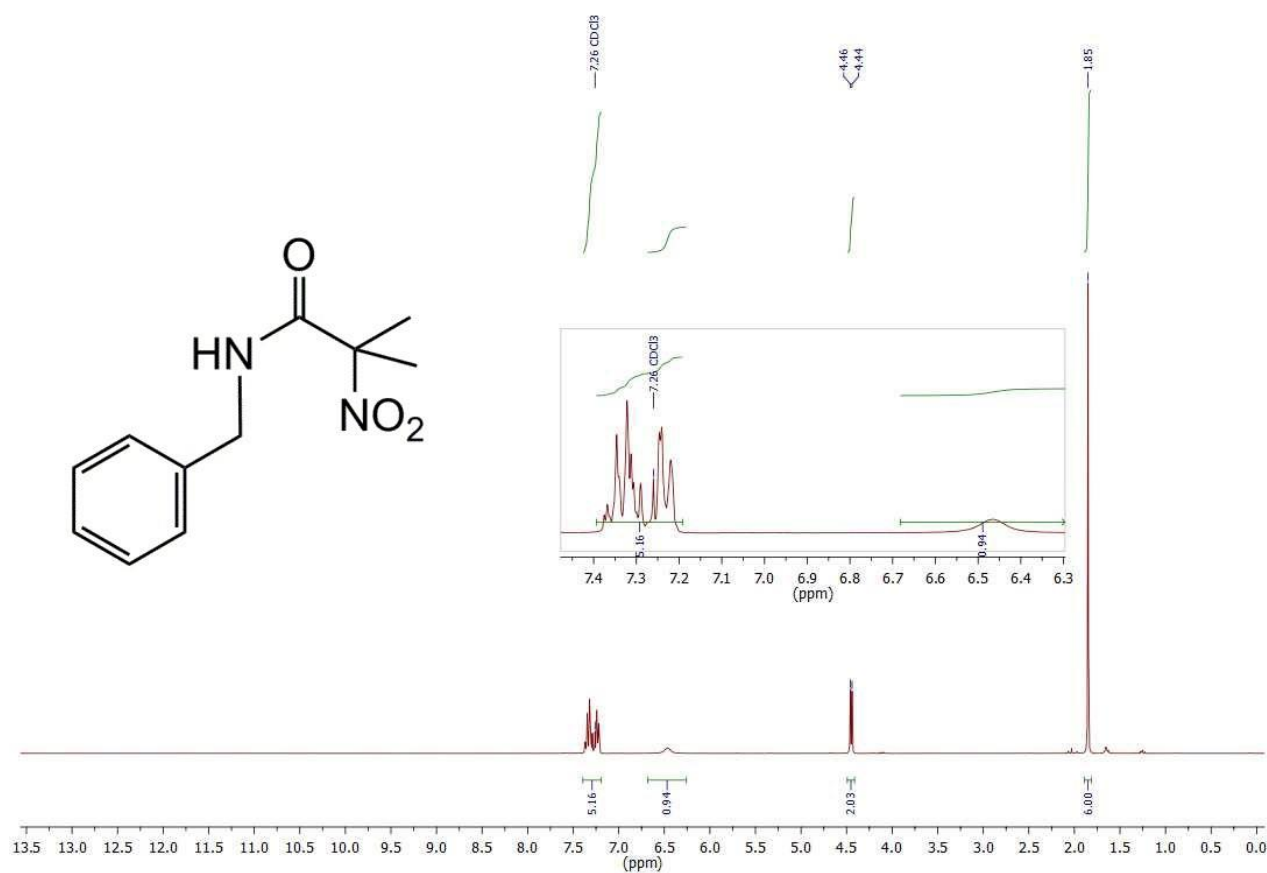

19 mg of **32** in 0.4 mL  $\text{CDCl}_3$ , 300 MHz, 16 scans

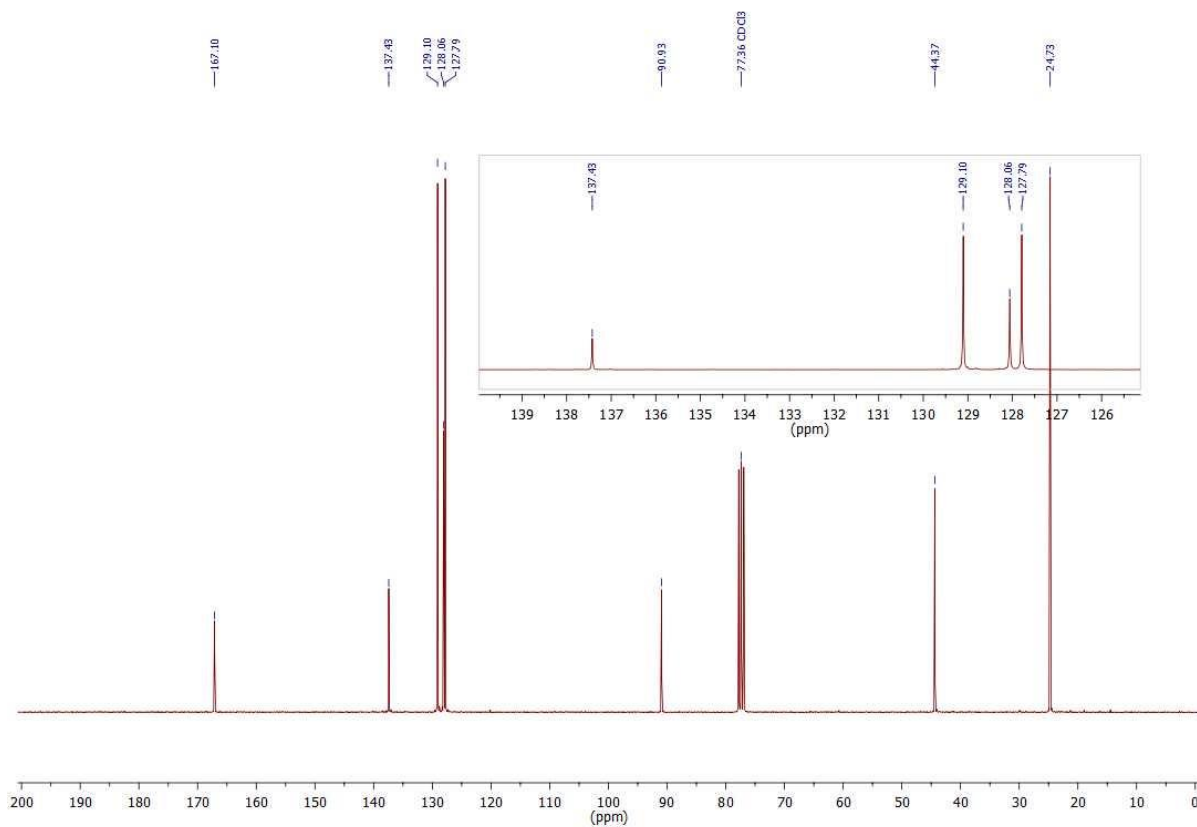

55 mg of **32** in 0.4 mL  $\text{CDCl}_3$ , 75 MHz, 14000 scans

ESI for:  
Bromo–nitro substitution on a tertiary  $\alpha$  carbon—a previously uncharacterized facet of the Kornblum substitution

33

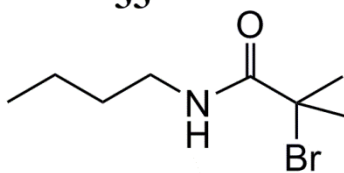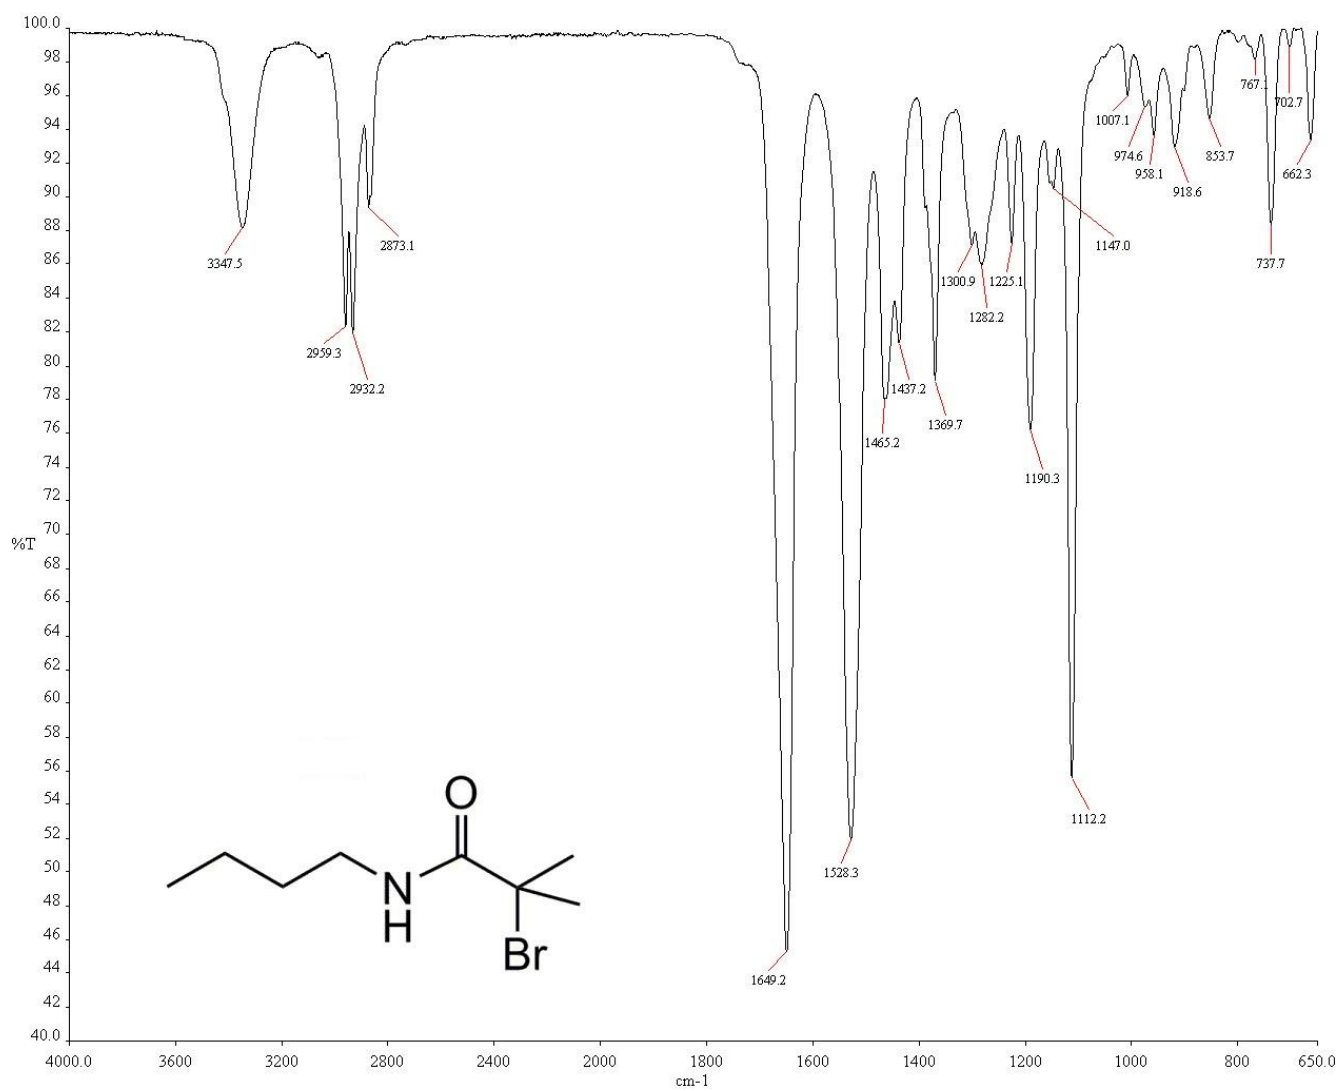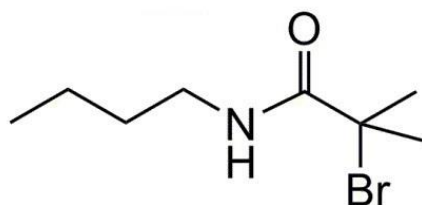

ESI for:

Bromo–nitro substitution on a tertiary  $\alpha$  carbon—a previously uncharacterized facet of the Kornblum substitution

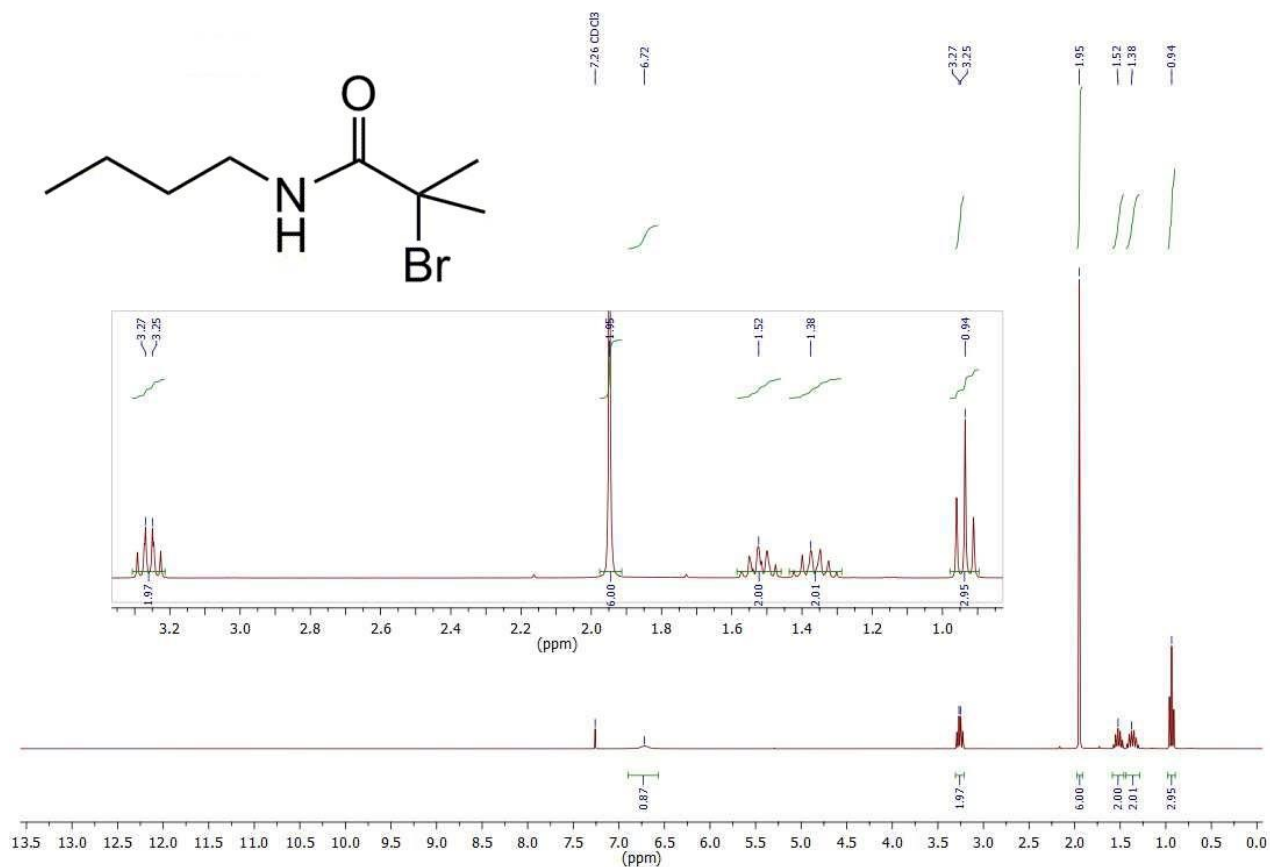

26 mg of **33** in 0.4 mL CDCl<sub>3</sub>, 300 MHz, 65 scans

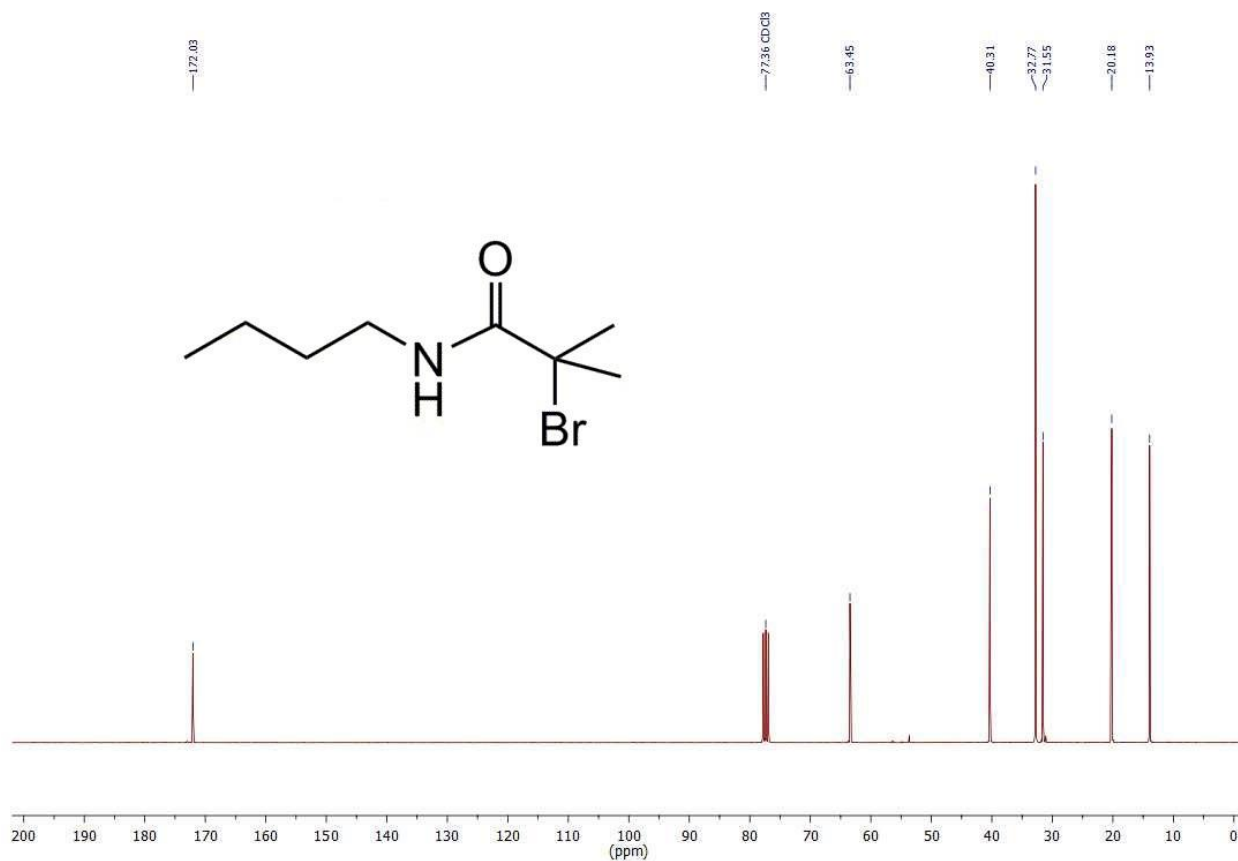

147 mg of **33** in 0.4 mL CDCl<sub>3</sub>, 75 MHz, 14000 scans

ESI for:  
Bromo–nitro substitution on a tertiary  $\alpha$  carbon—a previously uncharacterized facet of the Kornblum substitution

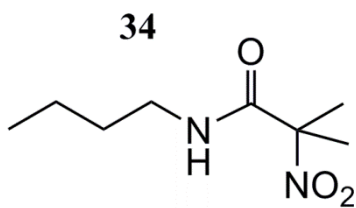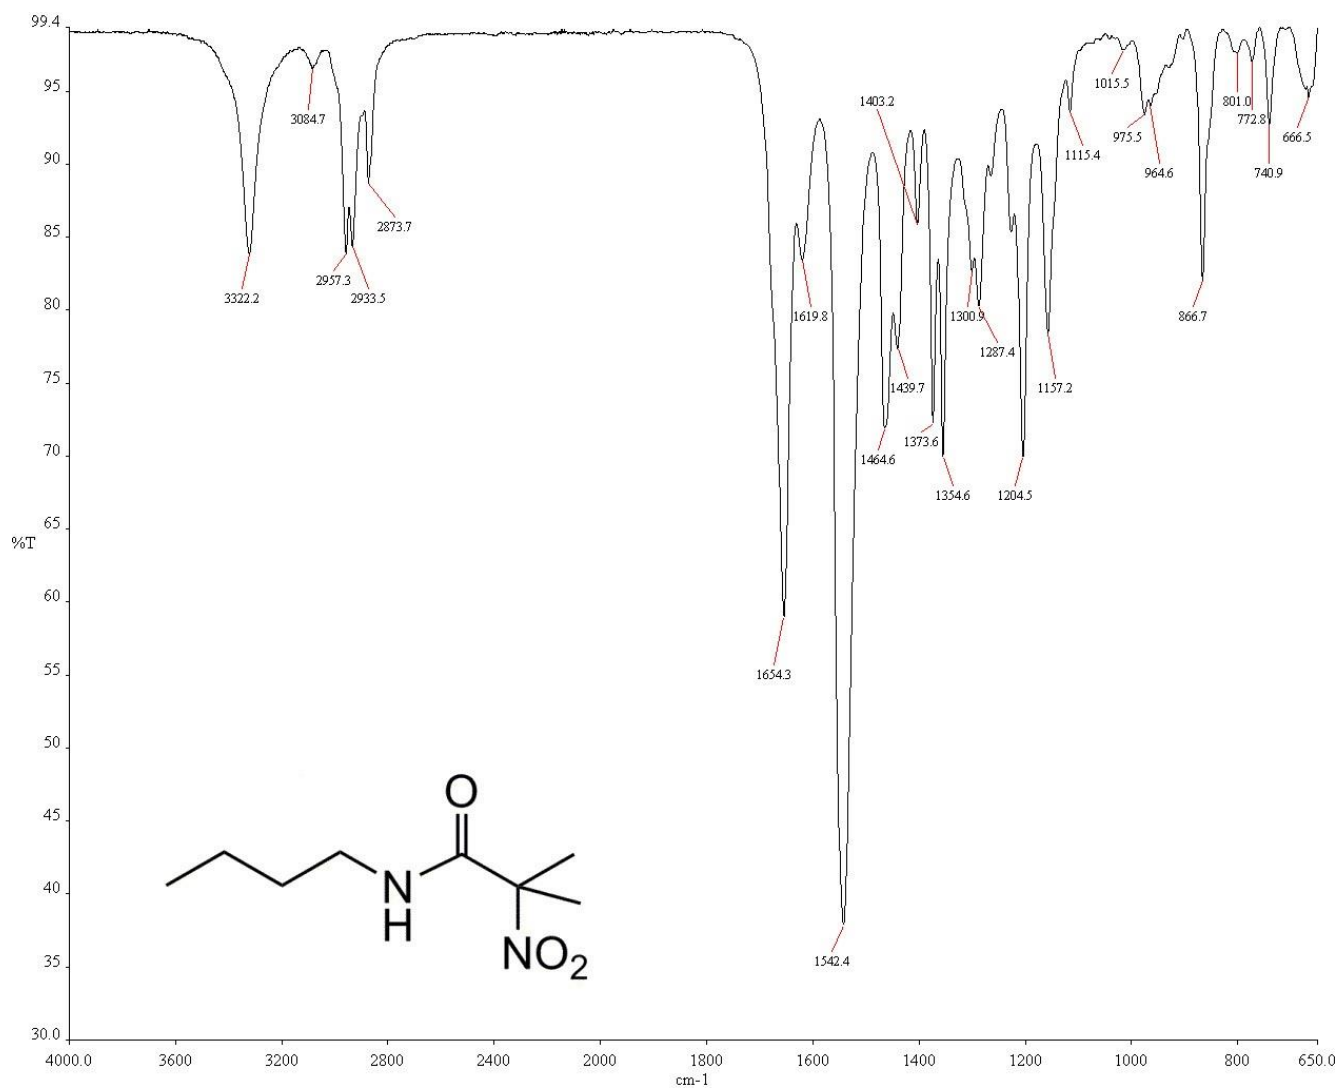

ESI for:

Bromo–nitro substitution on a tertiary  $\alpha$  carbon—a previously uncharacterized facet of the Kornblum substitution

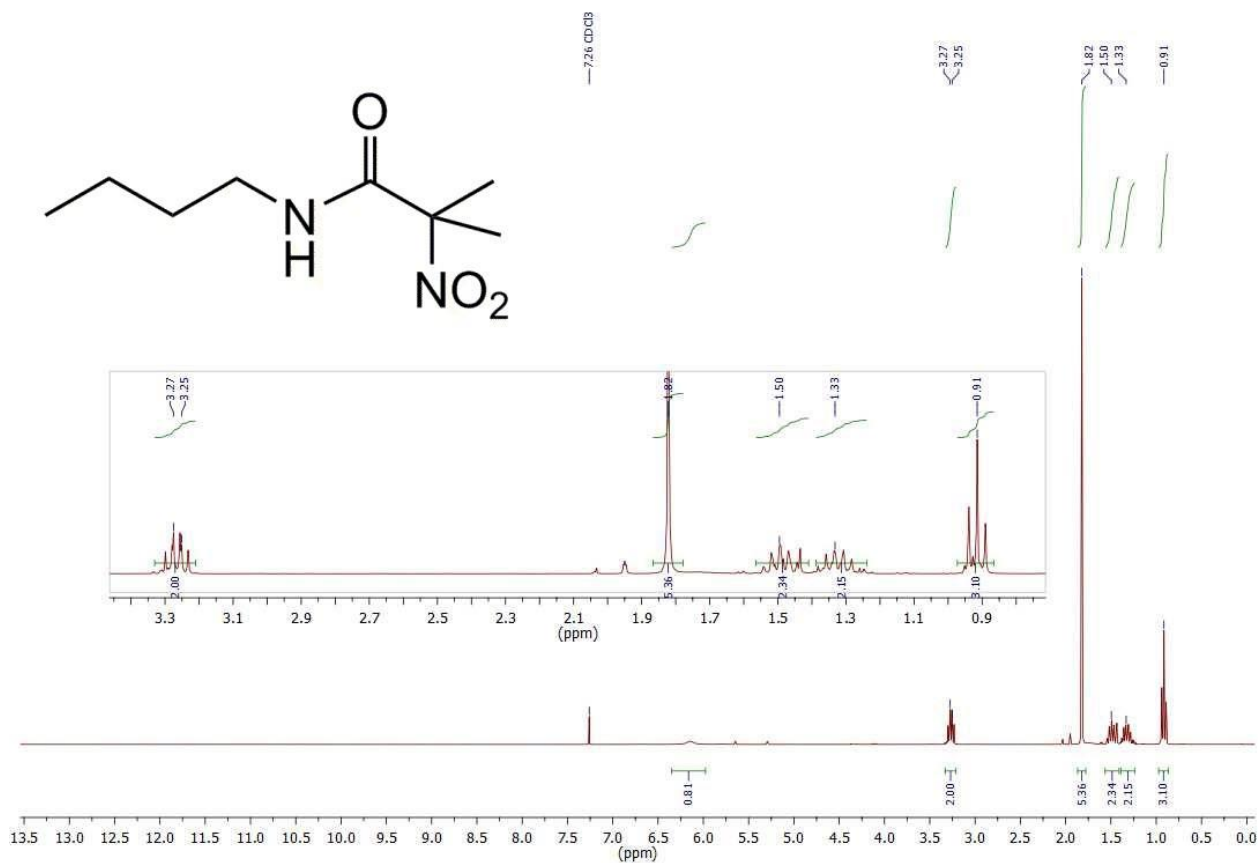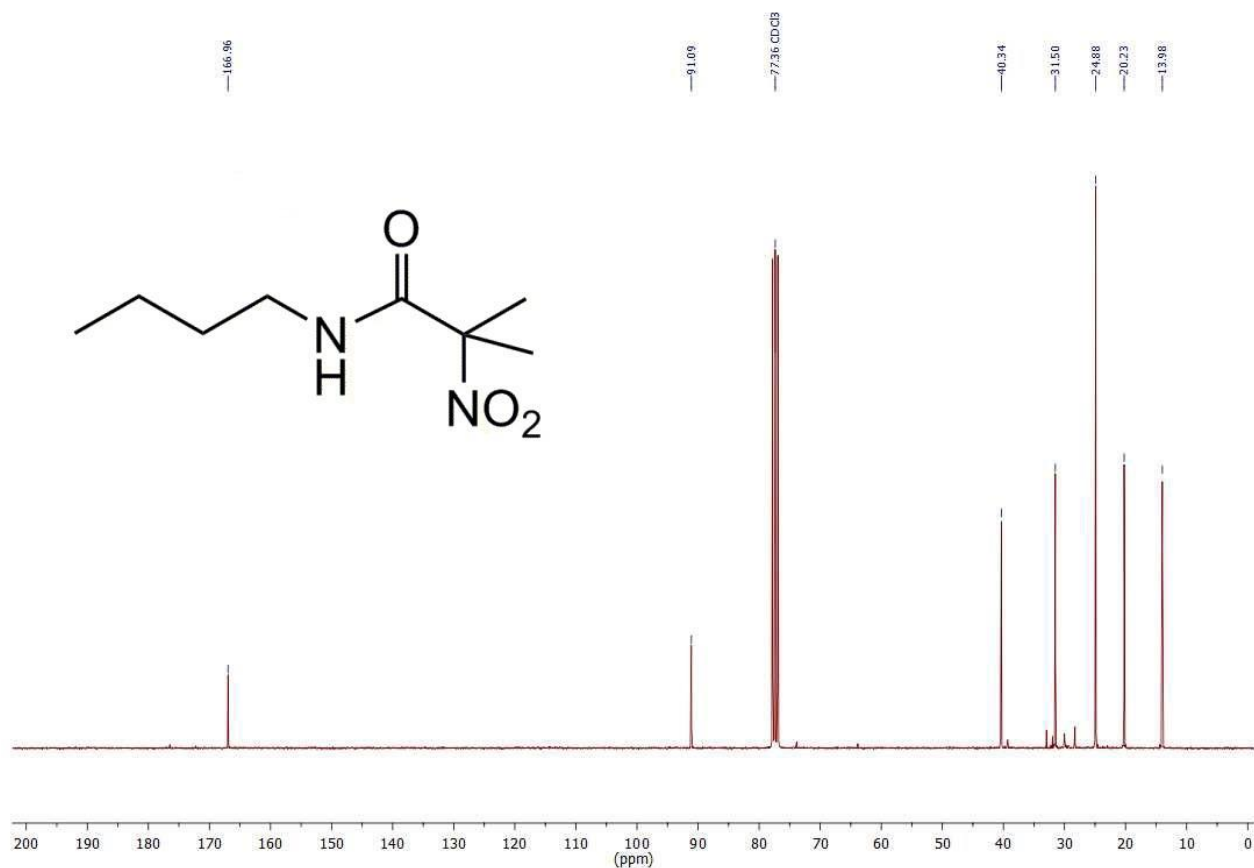

Supplement: c5ra14798k1.pdf [file c5ra14798k1.pdf]
